# Supplementary material
Source: PubMed Central journal article supplement (PMC4152363)
Supplement: rna-11-563-s01.pdf [file rna-11-563-s01.pdf]

## Supplemental Material to:

Omar Torres-Quesada, Jan Reinkensmeier,  
Jan-Philip Schlüter, Marta Robledo, Alexandra Peregrina,  
Robert Giegerich, Nicolás Toro, Anke Becker,  
and Jose I Jiménez-Zurdo

Genome-wide profiling of Hfq-binding RNAs uncovers  
extensive post-transcriptional rewiring of major stress  
response and symbiotic regulons in *Sinorhizobium meliloti*

2014; 11(4)

<http://dx.doi.org/10.4161/rna.28239>

[www.landesbioscience.com/journals/rnabiology/article/28239/](http://www.landesbioscience.com/journals/rnabiology/article/28239/)

**Table S1.** Reads mapping and statistics

|                           | <b>C-wt</b> | <b>C-SinI</b> | <b>Hfq-log</b> | <b>Hfq-stat</b> | <b>Hfq-cold</b> | <b>Hfq-heat</b> | <b>Hfq-salt</b> |
|---------------------------|-------------|---------------|----------------|-----------------|-----------------|-----------------|-----------------|
| <b>Raw reads</b>          | 3,831,151   | 4,160,695     | 4,369,818      | 4,131,614       | 3,902,689       | 3,921,397       | 4,286,578       |
| <b>Mapped reads</b>       | 2,972,437   | 3,881,916     | 4,044,659      | 3,764,945       | 3,674,853       | 3,703,621       | 3,077,688       |
| <b>Unmapped reads</b>     | 858,714     | 278,779       | 325,159        | 366,669         | 227,836         | 217,776         | 1,208,890       |
| <b>Uniq. mapped reads</b> | 1,250,199   | 906,528       | 1,028,776      | 1,155,531       | 1,178,600       | 326,838         | 1,413,343       |

**Table S2.- Hfq-associated sRNAs.**

| sRNA name <sup>1</sup> | CoIP-RNA <sup>2</sup> |         | GenDB annotation <sup>2</sup> |                | Enrichment in CoIP-RNA |         |         |          |          | RPKM values |          |         |          |          |          |          |
|------------------------|-----------------------|---------|-------------------------------|----------------|------------------------|---------|---------|----------|----------|-------------|----------|---------|----------|----------|----------|----------|
|                        | start                 | stop    | S <sup>3</sup>                | R <sup>4</sup> | start                  | stop    | Hfq-log | Hfq-stat | Hfq-cold | Hfq-heat    | Hfq-salt | Hfq-log | Hfq-stat | Hfq-cold | Hfq-heat | Hfq-salt |
| <b><i>asRNAs</i></b>   |                       |         |                               |                |                        |         |         |          |          |             |          |         |          |          |          |          |
| SMa_asRNA_118          | 189091                | 189189  | +                             | A              | 189091                 | 189189  | 14.64   | 1.86     | 33.15    | 25          | 132.09   | 2277.89 | 104.9    | 1885.48  | 1514.36  | 6196.36  |
| SMa_asRNA_140          | 239340                | 239436  | -                             | A              | 239340                 | 239436  | 1.18    | 6.07     | 1.4      | 1.33        | 12.17    | 30.06   | 71.37    | 52.48    | 31.54    | 430.36   |
| <b>SMa_Hfq_asRNA_1</b> | 239740                | 240305  | +                             | A              | 239740                 | 240305  | 27.62   | 8.59     | 13.72    | 13.25       | 8.98     | 501.47  | 59.63    | 272.83   | 281.1    | 146.26   |
| SMa_Hfq_asRNA_2        | 374508                | 374614  | +                             | A              | 374508                 | 374614  | 0.35    | 1.31     | 1.35     | 1.5         | 6.09     | 18.17   | 32.35    | 63.44    | 57.19    | 257.89   |
| <b>SMa_Hfq_asRNA_3</b> | 487642                | 487829  | +                             | A              | 487642                 | 487829  | 2.07    | 17.72    | 5.4      | 9           | 11.26    | 15.51   | 64.44    | 76.72    | 130.2    | 135.49   |
| SMa_Hfq_asRNA_4        | 533706                | 533826  | +                             | A              | 533706                 | 533826  | 4.15    | 4.72     | 6.6      | 1           | 0.46     | 40.17   | 14.3     | 301.52   | 25.29    | 11.69    |
| SMa_asRNA_326          | 589878                | 589974  | -                             | A              | 589878                 | 589974  | 3.67    | 0.2      | 15.6     | 3           | 0.91     | 841.76  | 8.92     | 446.1    | 63.08    | 14.59    |
| SMa_asRNA_335          | 597898                | 597995  | +                             | A              | 597898                 | 597995  | 11.4    | 0.47     | 3.6      | 2           | 0.91     | 1081.13 | 8.83     | 95.24    | 31.22    | 14.44    |
| SMa_asRNA_355          | 632618                | 632715  | -                             | A              | 632618                 | 632715  | 5.51    | 0.49     | 6.6      | 2           | 1.22     | 753.82  | 17.66    | 181.81   | 31.22    | 21.66    |
| SMa_Hfq_asRNA_5        | 706270                | 706376  | -                             | A              | 706270                 | 706376  | 7.05    | 0.94     | 3.9      | 2           | 1.22     | 299.78  | 8.09     | 95.15    | 28.59    | 19.84    |
| SMa_asRNA_407          | 724748                | 724927  | +                             | A              | 724748                 | 724927  | 2.59    | 4.72     | 0.8      | 2           | 8.52     | 21.6    | 14.42    | 14.14    | 34       | 161.16   |
| SMa_asRNA_414          | 734101                | 734197  | -                             | A              | 734101                 | 734197  | 5.96    | 3.54     | 2.2      | 7.11        | 2.5      | 450.94  | 98.14    | 279.91   | 977.82   | 262.59   |
| SmelA053               | 890286                | 890432  | -                             | A              | 890286                 | 890432  | 0.52    | 10.19    | 0.4      | 1           | 0.3      | 46.29   | 400.32   | 40.4     | 104.07   | 24.07    |
| SMa_Hfq_asRNA_6        | 920333                | 920826  | +                             | A              | 920333                 | 920826  | 4.38    | 3.67     | 12.96    | 2.4         | 29.7     | 35.42   | 10.51    | 183.78   | 30.97    | 348.04   |
| SMa_Hfq_asRNA_7        | 1072934               | 1073041 | +                             | A              | 1072934                | 1073041 | 1.66    | 1.89     | 1.2      | 3           | 10.04    | 27      | 8.01     | 23.57    | 56.66    | 209.64   |
| SMa_Hfq_asRNA_8        | 1193706               | 1194042 | +                             | A              | 1193706                | 1194042 | 1       | 0.57     | 7.2      | 0.67        | 2.74     | 77.88   | 15.41    | 178.76   | 9.08     | 54.59    |
| SMa_asRNA_664          | 1253036               | 1253207 | +                             | A              | 1253036                | 1253207 | 3.96    | 19.44    | 8.43     | 1.44        | 14.91    | 847.7   | 1630.18  | 1243.1   | 213.46   | 1809.99  |
| SMa_asRNA_672          | 1256049               | 1256148 | -                             | A              | 1256049                | 1256148 | 2.49    | 1.89     | 11.4     | 6           | 0.91     | 48.6    | 8.65     | 313.93   | 152.98   | 14.15    |
| <b>SMa_asRNA_677</b>   | 1257730               | 1257827 | +                             | A              | 1257730                | 1257827 | 0.69    | 0.94     | 9.6      | 7           | 2.74     | 39.67   | 17.66    | 268.39   | 187.32   | 57.76    |
| SMa_Hfq_asRNA_9        | 1265440               | 1265688 | +                             | A              | 1265440                | 1265688 | 0.5     | 0.94     | 0.8      | 4           | 6.19     | 19.52   | 13.9     | 23.85    | 135.16   | 170.49   |
| SMa_asRNA_687          | 1279352               | 1279450 | -                             | A              | 1279352                | 1279450 | 2.9     | 1.89     | 7.1      | 0.67        | 1.01     | 58.91   | 8.74     | 599.92   | 30.91    | 64.32    |
| SMc_Hfq_asRNA_1        | 161179                | 161355  | -                             | C              | 161179                 | 161355  | 2.76    | 1.84     | 2.49     | 28.57       | 4        | 126.31  | 29.34    | 134.22   | 1711.31  | 179.88   |
| SMc_Hfq_asRNA_2        | 169553                | 169658  | -                             | C              | 169553                 | 169658  | 1.78    | 1.35     | 7.4      | 1.33        | 1.42     | 45.85   | 8.16     | 288.16   | 28.86    | 40.05    |
| SMc_Hfq_asRNA_3        | 198030                | 198330  | -                             | C              | 198030                 | 198330  | 4.15    | 1.89     | 8.1      | 2           | 2.13     | 29.06   | 2.88     | 149.4    | 30.49    | 30.56    |
| SMc_Hfq_asRNA_4        | 323142                | 323356  | +                             | C              | 323142                 | 323356  | 1.15    | 1.05     | 8.1      | 1           | 1.98     | 18.08   | 4.03     | 209.16   | 14.23    | 39.49    |
| SMc_asRNA_1015         | 819242                | 819343  | +                             | C              | 819242                 | 819343  | 1.87    | 15.59    | 1.5      | 1           | 2.59     | 76.24   | 271.5    | 74.86    | 30       | 110.99   |

Table S2. Cont.

| sRNA name <sup>1</sup>  | ColP-RNA <sup>2</sup> |         | GenDB annotation <sup>2</sup> |                |         |         | Enrichment in ColP-RNA |          |          |          |          | RPKM values |           |          |          |           |
|-------------------------|-----------------------|---------|-------------------------------|----------------|---------|---------|------------------------|----------|----------|----------|----------|-------------|-----------|----------|----------|-----------|
|                         | start                 | stop    | S <sup>3</sup>                | R <sup>4</sup> | start   | stop    | Hfq-log                | Hfq-stat | Hfq-cold | Hfq-heat | Hfq-salt | Hfq-log     | Hfq-stat  | Hfq-cold | Hfq-heat | Hfq-salt  |
| SMc_Hfq_asRNA_5         | 852502                | 852767  | +                             | C              | 852502  | 852767  | 0.99                   | 0.41     | 6.6      | 0.67     | 0.3      | 36.54       | 3.25      | 207.33   | 11.5     | 5.32      |
| SMc_Hfq_asRNA_6         | 1100620               | 1100832 | +                             | C              | 1100620 | 1100832 | 2.76                   | 3.15     | 1.8      | 2.67     | 18.87    | 13.69       | 4.06      | 31.87    | 43.09    | 305.61    |
| SMc_Hfq_asRNA_7         | 1124662               | 1124768 | -                             | C              | 1124662 | 1124768 | 2.76                   | 4.72     | 10.8     | 2        | 2.13     | 27.25       | 16.18     | 277.54   | 28.59    | 39.68     |
| SMc_Hfq_asRNA_8         | 1198526               | 1198720 | +                             | C              | 1198526 | 1198720 | 6.22                   | 4.72     | 1        | 1.33     | 11.36    | 24.92       | 4.44      | 17.4     | 15.69    | 199.56    |
| SMc_asRNA_1280          | 1409124               | 1409234 | +                             | C              | 1409124 | 1409234 | 0.41                   | 0.4      | 0.34     | 1.43     | 5.09     | 52.54       | 15.59     | 53.51    | 248.08   | 739.41    |
| SMc_Hfq_asRNA_9         | 1426071               | 1426411 | +                             | C              | 1426071 | 1426411 | 8.29                   | 12.28    | 13.65    | 1.5      | 2.13     | 54.16       | 30.45     | 223.93   | 17.94    | 26.97     |
| SMc_Hfq_asRNA_10        | 1426437               | 1426679 | +                             | C              | 1426437 | 1426679 | 23.85                  | 7.09     | 8.8      | 1.33     | 1.83     | 88          | 7.12      | 150.14   | 12.59    | 23.29     |
| SMc_asRNA_1306          | 1460765               | 1460889 | -                             | C              | 1460765 | 1460889 | 1.38                   | 3.15     | 0.45     | 3.5      | 5.78     | 38.88       | 34.62     | 13.58    | 146.86   | 209.43    |
| SMc_Hfq_asRNA_11        | 1505764               | 1505870 | +                             | C              | 1505764 | 1505870 | 0.52                   | 40.38    | 1        | 2        | 8.32     | 90.84       | 3032.95   | 31.72    | 57.19    | 264.5     |
| SMc_asRNA_1331          | 1517149               | 1517246 | +                             | C              | 1517149 | 1517246 | 6.22                   | 9.45     | 8.85     | 1.5      | 3.35     | 49.59       | 26.49     | 502.15   | 62.44    | 151.62    |
| SMc_Hfq_asRNA_12        | 1577074               | 1577386 | -                             | C              | 1577074 | 1577386 | 4.47                   | 6.91     | 7.8      | 15.33    | 46.26    | 83.85       | 49.77     | 103.01   | 215.05   | 513.14    |
| SMc_asRNA_1392          | 1677067               | 1677165 | +                             | C              | 1677067 | 1677165 | 1.3                    | 1.77     | 7.2      | 1.33     | 0.41     | 39.27       | 17.48     | 299.96   | 30.91    | 7.15      |
| SMc_asRNA_1473          | 1851839               | 1851939 | +                             | C              | 1851839 | 1851939 | 1.68                   | 1.35     | 2.52     | 0.8      | 8.28     | 153.98      | 42.84     | 168.01   | 30.29    | 469.36    |
| SMc_Hfq_asRNA_13        | 1882475               | 1882605 | +                             | C              | 1882475 | 1882605 | 2.9                    | 1.89     | 5.7      | 1        | 0.61     | 44.52       | 6.61      | 239.64   | 23.36    | 16.2      |
| SmelC457                | 1963705               | 1963962 | +                             | C              | 1963705 | 1963962 | 10.19                  | 43.62    | 16.43    | 8.75     | 52.09    | 61026.84    | 102130.97 | 87773.3  | 50578.6  | 228821.38 |
| SMc_Hfq_asRNA_14        | 2054843               | 2055169 | -                             | C              | 2054843 | 2055169 | 6.22                   | 0.86     | 2.4      | 1        | 0.56     | 95.12       | 2.65      | 121.95   | 46.78    | 21.64     |
| SMc_asRNA_1560          | 2060655               | 2060788 | -                             | C              | 2060655 | 2060788 | 0.74                   | 1.01     | 0.45     | 3        | 8.67     | 29.02       | 12.92     | 12.66    | 114.16   | 295.69    |
| SMc_Hfq_asRNA_15        | 2130094               | 2130200 | -                             | C              | 2130094 | 2130200 | 2.07                   | 31.72    | 2.7      | 2        | 11.26    | 54.51       | 372.04    | 63.44    | 28.59    | 238.05    |
| SMc_Hfq_asRNA_16        | 2262599               | 2262713 | -                             | C              | 2262599 | 2262713 | 4.15                   | 1.89     | 5.04     | 1.6      | 0.49     | 76.07       | 7.53      | 302.5    | 79.82    | 18.46     |
| SmelCR256               | 2520774               | 2520857 | +                             | C              | 2520774 | 2520857 | 1.19                   | 6.95     | 1.08     | 1.16     | 0.9      | 694.31      | 1596.87   | 898.97   | 1019.87  | 614.89    |
| SMc_Hfq_asRNA_17        | 2804585               | 2804704 | -                             | C              | 2804585 | 2804704 | 1.38                   | 3.15     | 9.6      | 2        | 1.22     | 8.1         | 7.21      | 197.97   | 25.5     | 23.58     |
| <b>SMc_asRNA_1951</b>   | 2987843               | 2987940 | +                             | C              | 2987843 | 2987940 | 3.96                   | 1.68     | 9.37     | 1.48     | 3.49     | 1428.29     | 229.6     | 3099.49  | 499.53   | 945.8     |
| SMc_Hfq_asRNA_18        | 3030604               | 3030759 | +                             | C              | 3030604 | 3030759 | 1.66                   | 2.83     | 0.96     | 1.6      | 17.77    | 43.62       | 27.74     | 38.07    | 58.84    | 657.65    |
| <b>SmelCR308</b>        | 3109149               | 3109209 | +                             | C              | 3109149 | 3109209 | 2.49                   | 4.72     | 0.45     | 1        | 8.07     | 79.67       | 56.75     | 69.55    | 150.47   | 1217.9    |
| SMc_Hfq_asRNA_19        | 3154182               | 3154287 | -                             | C              | 3154182 | 3154287 | 2.26                   | 0.86     | 7        | 2        | 0.41     | 100.87      | 8.16      | 272.15   | 57.73    | 6.67      |
| SMc_Hfq_asRNA_20        | 3170205               | 3170330 | +                             | C              | 3170205 | 3170330 | 0.47                   | 0.43     | 10.8     | 2        | 0.61     | 30.86       | 6.87      | 235.68   | 24.28    | 5.62      |
| <b>SMc_Hfq_asRNA_21</b> | 3176950               | 3177118 | +                             | C              | 3176950 | 3177118 | 0.5                    | 5.86     | 1.68     | 4        | 1.1      | 69.02       | 337.97    | 65.27    | 162.94   | 33.49     |

Table S2. Cont.

| sRNA name <sup>1</sup> | ColP-RNA <sup>2</sup> |         | GenDB annotation <sup>2</sup> |                | Enrichment in ColP-RNA |         |         |          |          | RPKM values |          |          |          |          |          |           |
|------------------------|-----------------------|---------|-------------------------------|----------------|------------------------|---------|---------|----------|----------|-------------|----------|----------|----------|----------|----------|-----------|
|                        | start                 | stop    | S <sup>3</sup>                | R <sup>4</sup> | start                  | stop    | Hfq-log | Hfq-stat | Hfq-cold | Hfq-heat    | Hfq-salt | Hfq-log  | Hfq-stat | Hfq-cold | Hfq-heat | Hfq-salt  |
| SMc_Hfq_asRNA_22       | 3196375               | 3196780 | +                             | C              | 3196375                | 3196780 | 11.06   | 6.82     | 23.4     | 16          | 7.67     | 232.23   | 53.29    | 407.51   | 293.9    | 115.02    |
| SMc_asRNA_2170         | 3431298               | 3431533 | +                             | C              | 3431298                | 3431533 | 2.95    | 5.97     | 5.1      | 1.27        | 3.15     | 218.29   | 172.35   | 668.7    | 168.54   | 338.78    |
| SMc_asRNA_2194         | 3501869               | 3502070 | +                             | C              | 3501869                | 3502070 | 0.86    | 1.14     | 1.67     | 0.67        | 5.41     | 293.53   | 149.95   | 100.81   | 30.29    | 276.71    |
| SMc_asRNA_2214         | 3548012               | 3548123 | -                             | C              | 3548012                | 3548123 | 4.67    | 3.54     | 6.6      | 1           | 2.03     | 69.43    | 15.45    | 492.41   | 54.64    | 120.03    |
| SMc_asRNA_2215         | 3548232               | 3548328 | -                             | C              | 3548232                | 3548328 | 4.67    | 2.36     | 7.05     | 1.5         | 1.07     | 80.17    | 8.92     | 402.36   | 63.08    | 43.77     |
| <b>SMc_asRNA_2223</b>  | 3568619               | 3568716 | -                             | C              | 3568619                | 3568716 | 0.07    | 0.49     | 4.8      | 2           | 10.14    | 9.92     | 44.15    | 199.13   | 62.44    | 353.77    |
| SMc_asRNA_2239         | 3615739               | 3615976 | +                             | C              | 3615739                | 3615976 | 1.98    | 4.65     | 4.95     | 13          | 13.92    | 245.05   | 225.44   | 231.72   | 655.63   | 541.06    |
| SMB_Hfq_asRNA_1        | 87365                 | 87725   | -                             | B              | 87365                  | 87725   | 5.77    | 256.43   | 8.2      | 9           | 18.7     | 379.66   | 6633.16  | 575.83   | 678.03   | 1081.89   |
| SMB_Hfq_asRNA_2        | 277846                | 278321  | -                             | B              | 277846                 | 278321  | 1.13    | 1.29     | 0.27     | 1.27        | 9.68     | 10.21    | 3.64     | 7.13     | 38.57    | 258.64    |
| SMB_Hfq_asRNA_3        | 369388                | 369450  | -                             | B              | 369388                 | 369450  | 4.15    | 56.7     | 1.2      | 5           | 10.96    | 46.29    | 315.94   | 40.4     | 194.26   | 393.08    |
| SMB_Hfq_asRNA_4        | 405276                | 405337  | -                             | B              | 405276                 | 405337  | 0.69    | 7.87     | 2.8      | 1.33        | 8.12     | 15.68    | 125.62   | 177.9    | 49.35    | 445.07    |
| SMB_asRNA_2537         | 611474                | 611570  | -                             | B              | 611474                 | 611570  | 1.04    | 1.57     | 8.4      | 1.33        | 0.61     | 20.04    | 8.92     | 358.63   | 31.54    | 14.59     |
| SMB_Hfq_asRNA_5        | 635910                | 636057  | +                             | B              | 635910                 | 636057  | 1.9     | 0.79     | 10.5     | 3           | 2.13     | 65.68    | 5.85     | 194.92   | 41.35    | 28.68     |
| SMB_asRNA_2599         | 708857                | 708981  | +                             | B              | 708857                 | 708981  | 5.47    | 2.15     | 14.4     | 5.33        | 4.67     | 217.73   | 27.69    | 481.93   | 171.34   | 124.53    |
| SmelBR041              | 785108                | 785152  | -                             | B              | 785108                 | 785152  | 23.42   | 8.28     | 15.16    | 23.07       | 134.62   | 33394.59 | 4596.25  | 14273.05 | 23457.08 | 104307.46 |
| SMB_asRNA_2627         | 805768                | 805865  | +                             | B              | 805768                 | 805865  | 2.59    | 1.18     | 8.6      | 4           | 1.01     | 138.86   | 17.66    | 363.63   | 156.1    | 28.88     |
| <b>SMB_asRNA_2687</b>  | 936656                | 936755  | +                             | B              | 936656                 | 936755  | 0.46    | 1.05     | 0.15     | 9.25        | 4.41     | 9.72     | 8.65     | 8.48     | 1101.46  | 403.3     |
| SMB_Hfq_asRNA_6        | 956076                | 956255  | +                             | B              | 956076                 | 956255  | 4.74    | 4.05     | 12       | 2           | 2.43     | 81       | 24.04    | 183.83   | 17       | 27.52     |
| SMB_Hfq_asRNA_7        | 998847                | 998967  | -                             | B              | 998847                 | 998967  | 2.59    | 2.36     | 2.6      | 2.67        | 11.77    | 32.13    | 7.15     | 84.15    | 75.86    | 333.31    |
| SMB_asRNA_2767         | 1104414               | 1104510 | -                             | B              | 1104414                | 1104510 | 15.34   | 1.89     | 0.03     | 0.78        | 0.04     | 360.75   | 8.92     | 26.24    | 883.19   | 29.18     |
| SMB_asRNA_2781         | 1116527               | 1116647 | +                             | B              | 1116527                | 1116647 | 0.69    | 32.29    | 0.13     | 1.11        | 1.29     | 8.03     | 286.08   | 7.01     | 101.14   | 105.25    |
| SMB_asRNA_2782         | 1116728               | 1116825 | +                             | B              | 1116728                | 1116825 | 0.57    | 23.19    | 0.36     | 1.2         | 7.18     | 19.84    | 468.02   | 17.32    | 62.44    | 418.75    |
| SMB_Hfq_asRNA_8        | 1284907               | 1285044 | -                             | B              | 1284907                | 1285044 | 1.56    | 12.99    | 0.22     | 0.91        | 5.64     | 14.09    | 62.71    | 18.44    | 88.68    | 517.84    |
| SMB_asRNA_2913         | 1318963               | 1319217 | +                             | B              | 1318963                | 1319217 | 6.92    | 22.19    | 2.91     | 1.58        | 4.95     | 709.01   | 889.16   | 1061.41  | 611.92   | 1487.23   |
| SMB_asRNA_2914         | 1321782               | 1321879 | +                             | B              | 1321782                | 1321879 | 1.04    | 2.36     | 1.35     | 1.5         | 5.63     | 9.92     | 8.83     | 69.26    | 62.44    | 259.91    |
| <b>SmelB128</b>        | 1331218               | 1331295 | +                             | B              | 1331218                | 1331295 | 1.24    | 20.32    | 0.28     | 0.65        | 1.72     | 137.08   | 943.07   | 163.17   | 392.26   | 861.75    |
| SMB_asRNA_2941         | 1381268               | 1381364 | -                             | B              | 1381268                | 1381364 | 1.04    | 4.72     | 0.3      | 4.5         | 9.28     | 10.02    | 26.77    | 8.75     | 252.34   | 437.66    |

Table S2. Cont.

| sRNA name <sup>1</sup>    | ColP-RNA <sup>2</sup> |         | GenDB annotation <sup>2</sup> |                |         |         | Enrichment in ColP-RNA |          |          |          |          | RPKM values |           |           |           |           |
|---------------------------|-----------------------|---------|-------------------------------|----------------|---------|---------|------------------------|----------|----------|----------|----------|-------------|-----------|-----------|-----------|-----------|
|                           | start                 | stop    | S <sup>3</sup>                | R <sup>4</sup> | start   | stop    | Hfq-log                | Hfq-stat | Hfq-cold | Hfq-heat | Hfq-salt | Hfq-log     | Hfq-stat  | Hfq-cold  | Hfq-heat  | Hfq-salt  |
| Smb_asRNA_2951            | 1403234               | 1403330 | -                             | B              | 1403234 | 1403330 | 0.78                   | 6.5      | 0.1      | 0.67     | 6.14     | 20.04       | 89.22     | 8.75      | 94.63     | 875.31    |
| Smb_asRNA_2952            | 1406453               | 1406549 | -                             | B              | 1406453 | 1406549 | 3.87                   | 4.09     | 4.4      | 8.67     | 16.84    | 270.56      | 107.06    | 183.69    | 378.51    | 598.13    |
| Smb_Hfq_asRNA_9           | 1440135               | 1440297 | -                             | B              | 1440135 | 1440297 | 0.52                   | 1.18     | 11.2     | 1.33     | 1.62     | 5.96        | 5.31      | 286.29    | 18.77     | 30.39     |
| <b><i>trans-sRNAs</i></b> |                       |         |                               |                |         |         |                        |          |          |          |          |             |           |           |           |           |
| <b>SmelA001</b>           | 1002                  | 1054    | +                             | A              | 1002    | 1054    | 1.33                   | 0.77     | 3.5      | 0.42     | 5.28     | 1137.09     | 244.93    | 2225.22   | 230.91    | 2763.42   |
| SmelC412 (AbcR1)          | 1698818               | 1698948 | -                             | C              | 1698818 | 1698948 | 21.02                  | 115.33   | 37.3     | 59.32    | 69.43    | 84232.61    | 180604.98 | 293490.92 | 504954.04 | 449094.94 |
| SmelC289                  | 1398278               | 1398426 | -                             | C              | 1398278 | 1398426 | 14.33                  | 30.62    | 7.08     | 19.55    | 39.04    | 379658.83   | 316929.17 | 139837.16 | 417648.36 | 633796.48 |
| SmelC151                  | 843451                | 843524  | +                             | C              | 843451  | 843524  | 5.35                   | 20.15    | 9.41     | 1        | 10.5     | 15263.48    | 22477.09  | 72302.92  | 8269.24   | 66269.94  |
| SmelC073                  | 424110                | 424268  | +                             | C              | 424110  | 424268  | 3.57                   | 177.87   | 11.2     | 10.57    | 18.5     | 22216.06    | 433158.7  | 14434.57  | 14720.81  | 19606.49  |
| SmelC689                  | 3046710               | 3046789 | +                             | C              | 3046710 | 3046789 | 26.5                   | 113.22   | 15.76    | 28.52    | 283.2    | 12721.43    | 21245.64  | 6395.3    | 12506.2   | 94633.79  |
| SmelCR165                 | 1491158               | 1491215 | +                             | C              | 1491158 | 1491215 | 5.71                   | 0.28     | 1.52     | 0.3      | 1.58     | 6167.36     | 104.45    | 3876.6    | 791.28    | 3318.13   |
| SmelC671                  | 2986421               | 2986520 | +                             | C              | 2986421 | 2986520 | 8.51                   | 26.35    | 2.87     | 0.47     | 41.39    | 38832.55    | 46991.38  | 3767.18   | 642.52    | 44737.9   |
| <b>SmelC411 (AbcR2)</b>   | 1698618               | 1698731 | -                             | C              | 1698618 | 1698731 | 2.24                   | 221.46   | 1.06     | 14.37    | 59.55    | 7298.74     | 282865.32 | 3334.32   | 49141.79  | 154840.05 |
| <b>SmelA075</b>           | 1220693               | 1220808 | +                             | A              | 1220693 | 1220808 | 9.29                   | 1.17     | 0.81     | 10.57    | 21.25    | 2882.57     | 134.29    | 3167.11   | 44575.49  | 68137.55  |
| SmelC025                  | 206861                | 206977  | -                             | C              | 206861  | 206977  | 1.35                   | 0.33     | 0.22     | 2.71     | 5.77     | 3755.19     | 347.64    | 3016.76   | 40794.93  | 65934.48  |
| SMc_ncRNA_328             | 3432973               | 3433069 | -                             | C              | 3432973 | 3433069 | 50.06                  | 24.3     | 22.5     | 10.25    | 15.37    | 1683.51     | 312.26    | 2615.37   | 1261.7    | 1466.14   |
| SmelCR249                 | 2436657               | 2436725 | +                             | C              | 2436657 | 2436725 | 4.6                    | 1.31     | 2.92     | 3.6      | 5.11     | 2577.99     | 275.93    | 2385.54   | 3148.3    | 3435.17   |
| SmelC339                  | 1527765               | 1527858 | +                             | C              | 1527765 | 1527858 | 1.79                   | 14.2     | 9.46     | 0.62     | 7.35     | 1954.4      | 6076.23   | 1841.35   | 97.65     | 1174.22   |
| SMc_ncRNA_330             | 3433149               | 3433246 | -                             | C              | 3433149 | 3433246 | 50.29                  | 10.04    | 25.2     | 12       | 19.17    | 1914.3      | 141.29    | 1445.85   | 718.07    | 902.48    |
| SMc_ncRNA_320             | 3406544               | 3406641 | +                             | C              | 3406544 | 3406641 | 8.84                   | 6.22     | 5.79     | 4.57     | 7.39     | 793.49      | 211.94    | 1160.15   | 967.84    | 1220.15   |
| SmelCR154                 | 1402390               | 1402495 | +                             | C              | 1402390 | 1402495 | 1.3                    | 1.21     | 5.27     | 2.14     | 16.35    | 192.57      | 65.31     | 976.53    | 404.1     | 2503.1    |
| SMc_ncRNA_324             | 3413409               | 3413506 | -                             | C              | 3413409 | 3413506 | 1.84                   | 0.79     | 6.66     | 1.6      | 4.38     | 148.78      | 17.66     | 952.36    | 218.54    | 512.61    |
| Smb_ncRNA_373             | 613314                | 613456  | -                             | B              | 613314  | 613456  | 13.35                  | 3.84     | 8.24     | 0.91     | 4.32     | 693.34      | 72.62     | 890       | 85.58     | 380.98    |
| SMc_Hfq_ncRNA_6           | 1825885               | 1826007 | +                             | C              | 1825885 | 1826007 | 0.89                   | 315.91   | 3.66     | 1.9      | 11.33    | 1588.44     | 220628.52 | 876.06    | 472.62    | 2243.43   |
| SmelC181                  | 923658                | 923856  | -                             | C              | 923658  | 923856  | 0.87                   | 34.01    | 1.41     | 0.43     | 3.24     | 1475.14     | 22596.15  | 737.61    | 230.62    | 1397.31   |
| <b>SmelA060</b>           | 1021534               | 1021641 | +                             | A              | 1021534 | 1021641 | 1.69                   | 623.52   | 0.27     | 31.65    | 77.18    | 6201.18     | 894602.34 | 652.06    | 84706.14  | 156995.78 |
| SmelA035                  | 552854                | 552983  | +                             | A              | 552854  | 552983  | 11.46                  | 144.1    | 1.6      | 14.53    | 15.38    | 1644.97     | 8114.82   | 515.61    | 5107.21   | 4120.07   |

Table S2. Cont.

| sRNA name <sup>1</sup> | ColP-RNA <sup>2</sup> |         | GenDB annotation <sup>2</sup> |                |         |         | Enrichment in ColP-RNA |          |          |          |          | RPKM values |           |          |          |          |
|------------------------|-----------------------|---------|-------------------------------|----------------|---------|---------|------------------------|----------|----------|----------|----------|-------------|-----------|----------|----------|----------|
|                        | start                 | stop    | S <sup>3</sup>                | R <sup>4</sup> | start   | stop    | Hfq-log                | Hfq-stat | Hfq-cold | Hfq-heat | Hfq-salt | Hfq-log     | Hfq-stat  | Hfq-cold | Hfq-heat | Hfq-salt |
| SMc_ncRNA_302          | 3367250               | 3367346 | -                             | C              | 3367250 | 3367346 | 12.81                  | 0.26     | 8.55     | 1.5      | 2.28     | 4509.41     | 26.77     | 489.84   | 63.08    | 102.12   |
| SMc_ncRNA_199          | 683509                | 683606  | +                             | C              | 683509  | 683606  | 7.05                   | 1.89     | 6.24     | 0.8      | 0.85     | 158.7       | 8.83      | 441.55   | 31.22    | 43.32    |
| <b>SmelB126</b>        | 1325476               | 1325586 | +                             | B              | 1325476 | 1325586 | 0.36                   | 342.87   | 0.35     | 11.96    | 54.03    | 1961.57     | 737775.55 | 420.41   | 15628.87 | 53741.35 |
| SmelC483               | 2098461               | 2098583 | -                             | C              | 2098461 | 2098583 | 0.34                   | 0.14     | 2.29     | 0.37     | 5.33     | 260.79      | 35.18     | 413.89   | 49.75    | 799.58   |
| SMc_ncRNA_326          | 3430139               | 3430235 | -                             | C              | 3430139 | 3430235 | 8.04                   | 1.77     | 2.51     | 1.45     | 0.66     | 300.63      | 17.84     | 393.62   | 220.8    | 80.24    |
| <b>SmelC165</b>        | 910182                | 910297  | +                             | C              | 910182  | 910297  | 2.61                   | 0.7      | 3.13     | 15.11    | 71.69    | 276.53      | 22.38     | 336.46   | 1767.19  | 6459.37  |
| SmelC435               | 1823103               | 1823231 | +                             | C              | 1823103 | 1823231 | 7.65                   | 178.26   | 0.65     | 5.29     | 41.13    | 2049.55     | 18723.56  | 335.44   | 2988.47  | 17781.8  |
| SMA_ncRNA_83           | 706600                | 706696  | -                             | A              | 706600  | 706696  | 5.8                    | 0.36     | 6.4      | 1.33     | 1.01     | 1082.26     | 17.84     | 271.16   | 31.54    | 29.18    |
| <b>SmelAR018</b>       | 224583                | 224642  | -                             | A              | 224583  | 224642  | 0.91                   | 0.59     | 1.09     | 1.64     | 7.03     | 97.2        | 14.42     | 268.68   | 407.95   | 1485.84  |
| <b>SmelC601</b>        | 2625313               | 2625439 | -                             | C              | 2625313 | 2625439 | 0.04                   | 7.23     | 0.08     | 1.16     | 2.96     | 76.54       | 5662.6    | 253.87   | 4240.1   | 8273.23  |
| <b>SmelA072</b>        | 1161766               | 1161873 | +                             | A              | 1161766 | 1161873 | 1.05                   | 345.81   | 0.17     | 12.53    | 47.15    | 2232.07     | 289709.68 | 243.54   | 20199.16 | 57848.14 |
| SMA_ncRNA_52           | 344734                | 344832  | +                             | A              | 344734  | 344832  | 9.8                    | 5.15     | 1.93     | 8.67     | 7.71     | 500.74      | 96.16     | 239.97   | 1174.4   | 807.6    |
| SmelCR278              | 2761185               | 2761252 | -                             | C              | 2761185 | 2761252 | 3.11                   | 6.3      | 0.67     | 4.11     | 8.52     | 114.36      | 89.09     | 237.07   | 1619.8   | 2611.66  |
| SMc_Hfq_ncRNA_7        | 2241875               | 2242065 | -                             | C              | 2241875 | 2242065 | 0.62                   | 1.89     | 7.2      | 2        | 1.52     | 10.18       | 13.59     | 208.78   | 48.06    | 33.34    |
| SMA_ncRNA_107          | 962683                | 962779  | -                             | A              | 962683  | 962779  | 0.86                   | 1.97     | 4.4      | 6        | 6.9      | 40.08       | 35.69     | 183.69   | 252.34   | 240.71   |
| SMc_Hfq_ncRNA_4        | 1635208               | 1635315 | -                             | C              | 1635208 | 1635315 | 7.47                   | 1.42     | 7.2      | 5        | 6.39     | 315.01      | 16.03     | 180.69   | 113.32   | 131.03   |
| SMc_Hfq_ncRNA_5        | 1734353               | 1734540 | +                             | C              | 1734353 | 1734540 | 1.3                    | 1.18     | 7.2      | 10.67    | 2.23     | 72.39       | 23.02     | 157.96   | 244.12   | 37.64    |
| SMA_Hfq_ncRNA_1        | 198840                | 198991  | -                             | A              | 198840  | 198991  | 1.24                   | 2.83     | 1.93     | 4.67     | 10.62    | 12.79       | 11.39     | 156.3    | 402.58   | 726.16   |
| <b>SmelC570</b>        | 2504181               | 2504263 | -                             | C              | 2504181 | 2504263 | 1.53                   | 7.46     | 0.4      | 1        | 1.14     | 152.25      | 302.37    | 153.34   | 405.49   | 375.08   |
| SMA_ncRNA_167          | 1328352               | 1328451 | +                             | A              | 1328352 | 1328451 | 0.46                   | 0.35     | 1.02     | 0.4      | 6.57     | 77.76       | 17.31     | 135.75   | 30.6     | 757.07   |
| SMA_Hfq_ncRNA_6        | 706407                | 706476  | -                             | A              | 706407  | 706476  | 17.63                  | 2.36     | 3.6      | 2        | 0.61     | 458.24      | 12.36     | 133.33   | 43.71    | 10.11    |
| <b>SmelB075</b>        | 800730                | 800793  | -                             | B              | 800730  | 800793  | 0.96                   | 17.4     | 0.94     | 4.57     | 2.17     | 561.95      | 4070.1    | 132.57   | 717.1    | 265.33   |
| SMc_Hfq_ncRNA_1        | 485164                | 485270  | +                             | C              | 485164  | 485270  | 1.74                   | 6.61     | 2.55     | 1        | 0.76     | 181.69      | 274.99    | 126.87   | 28.59    | 26.45    |
| SmelC434               | 1821211               | 1821366 | +                             | C              | 1821211 | 1821366 | 2.14                   | 6.43     | 0.43     | 1.37     | 2.68     | 1009.41     | 1187.16   | 119.66   | 411.87   | 634.97   |
| SMc_ncRNA_210          | 1099201               | 1099351 | +                             | C              | 1099201 | 1099351 | 0.82                   | 6.01     | 0.15     | 1.49     | 1.15     | 160.93      | 475.69    | 112.38   | 1215.74  | 721.6    |
| SmelC416               | 1718814               | 1718919 | -                             | C              | 1718814 | 1718919 | 0.09                   | 60.02    | 0.1      | 0.91     | 10.86    | 45.85       | 14303.64  | 112.06   | 1154.57  | 10713.26 |
| SmelC466               | 1979801               | 1979975 | -                             | C              | 1979801 | 1979975 | 0.2                    | 0.13     | 0.21     | 0.12     | 7.1      | 72.21       | 14.84     | 111.51   | 52.45    | 3157.66  |

Table S2. Cont.

| sRNA name <sup>1</sup> | CoIP-RNA <sup>2</sup> |         | GenDB annotation <sup>2</sup> |                | Enrichment in CoIP-RNA |         |         |          |          | RPKM values |          |         |          |          |          |          |
|------------------------|-----------------------|---------|-------------------------------|----------------|------------------------|---------|---------|----------|----------|-------------|----------|---------|----------|----------|----------|----------|
|                        | start                 | stop    | S <sup>3</sup>                | R <sup>4</sup> | start                  | stop    | Hfq-log | Hfq-stat | Hfq-cold | Hfq-heat    | Hfq-salt | Hfq-log | Hfq-stat | Hfq-cold | Hfq-heat | Hfq-salt |
| SmelC600               | 2625202               | 2625346 | +                             | C              | 2625202                | 2625346 | 0.65    | 2.98     | 0.67     | 0.78        | 5.68     | 33.52   | 65.65    | 111.18   | 126.6    | 814.89   |
| SmelC092               | 525012                | 525073  | +                             | C              | 525012                 | 525073  | 0.44    | 2.36     | 0.9      | 1           | 15.62    | 31.36   | 83.75    | 109.48   | 98.7     | 1746.03  |
| SMA_ncRNA_6            | 14244                 | 14353   | +                             | A              | 14244                  | 14353   | 4.15    | 18.51    | 0.9      | 2.4         | 0.79     | 203.24  | 361.9    | 107.99   | 305.96   | 77.19    |
| <b>SmelB047</b>        | 545360                | 545471  | -                             | B              | 545360                 | 545471  | 0.81    | 256.41   | 0.07     | 9.58        | 51.12    | 243.01  | 31023.15 | 90.91    | 15024.92 | 61006.57 |
| SmelCR230              | 2237604               | 2237674 | +                             | C              | 2237604                | 2237674 | 1.02    | 18.65    | 0.6      | 1.25        | 16.97    | 492.86  | 3595.69  | 83.65    | 172.37   | 2212.32  |
| SMc_ncRNA_256          | 2070690               | 2070798 | +                             | C              | 2070690                | 2070798 | 1.24    | 1.89     | 2.2      | 1.33        | 8.12     | 17.84   | 7.94     | 77.84    | 28.07    | 253.16   |
| SMA_Hfq_ncRNA_5        | 643567                | 643692  | -                             | A              | 643567                 | 643692  | 8.92    | 0.94     | 2.4      | 2           | 1.42     | 324.01  | 6.87     | 74.07    | 48.57    | 33.69    |
| SMA_Hfq_ncRNA_7        | 989029                | 989149  | +                             | A              | 989029                 | 989149  | 2.37    | 2.02     | 1.32     | 1.2         | 9.74     | 56.23   | 14.3     | 70.12    | 50.57    | 461.95   |
| SmelA052               | 882393                | 882521  | +                             | A              | 882393                 | 882521  | 0.74    | 10.12    | 0.82     | 0.75        | 5.17     | 67.82   | 395.8    | 65.77    | 47.44    | 367.48   |
| SMc_Hfq_ncRNA_8        | 3095011               | 3095064 | -                             | C              | 3095011                | 3095064 | 0.58    | 6.24     | 0.37     | 1.25        | 1.6      | 108     | 512.83   | 62.85    | 226.64   | 262.05   |
| SMc_Hfq_ncRNA_2        | 1184098               | 1184204 | -                             | C              | 1184098                | 1184204 | 0.92    | 1.05     | 2.4      | 3           | 9.74     | 27.25   | 8.09     | 55.51    | 57.19    | 204.99   |
| SMb_Hfq_ncRNA_2        | 476454                | 476505  | +                             | B              | 476454                 | 476505  | 0.96    | 25.08    | 0.27     | 2.44        | 0.61     | 93.46   | 1131.68  | 48.95    | 588.39   | 108.85   |
| SmelC067               | 411084                | 411173  | -                             | C              | 411084                 | 411173  | 0.83    | 1.42     | 0.72     | 1.2         | 5.23     | 32.4    | 19.23    | 47.14    | 67.99    | 330.19   |
| SMc_ncRNA_251          | 1965348               | 1965445 | +                             | C              | 1965348                | 1965445 | 5.53    | 6.3      | 1.2      | 26.67       | 1.62     | 69.43   | 26.49    | 43.29    | 1217.6   | 50.54    |
| SMc_ncRNA_202          | 791769                | 791866  | -                             | C              | 791769                 | 791866  | 0.19    | 0.3      | 1.2      | 1.33        | 6.29     | 19.84   | 8.83     | 43.29    | 31.22    | 216.59   |
| <b>SmelCR205</b>       | 1822907               | 1822965 | +                             | C              | 1822907                | 1822965 | 1.04    | 87.41    | 0.22     | 5.64        | 5.26     | 16.48   | 1070.75  | 43.14    | 1555.74  | 1127.27  |
| SmelCR197              | 1770021               | 1770081 | -                             | C              | 1770021                | 1770081 | 0.24    | 6.63     | 0.4      | 2           | 2.43     | 159.35  | 1858.49  | 41.73    | 250.79   | 266.78   |
| SmelCR070              | 775030                | 775111  | +                             | C              | 775030                 | 775111  | 0.15    | 0.7      | 0.6      | 2.8         | 5.84     | 11.85   | 31.66    | 41.39    | 223.87   | 405.54   |
| <b>SmelB008</b>        | 65071                 | 65147   | +                             | B              | 65071                  | 65147   | 0.39    | 5.46     | 0.01     | 0.47        | 1.96     | 63.12   | 404.6    | 33.06    | 3695.38  | 11853.63 |
| SMA_ncRNA_165          | 1319143               | 1319271 | +                             | A              | 1319143                | 1319271 | 2.76    | 4.72     | 0.22     | 0.25        | 9.09     | 22.61   | 13.42    | 32.89    | 23.72    | 1305.39  |
| SMA_Hfq_ncRNA_4        | 552893                | 553025  | -                             | A              | 552893                 | 553025  | 5.18    | 8.27     | 1.2      | 10.67       | 6.29     | 65.78   | 39.04    | 31.9     | 345.07   | 159.6    |
| <b>SMA_Hfq_ncRNA_3</b> | 240685                | 240791  | +                             | A              | 240685                 | 240791  | 1.04    | 3.15     | 0.75     | 1           | 5.02     | 18.17   | 24.26    | 31.72    | 28.59    | 211.6    |
| SMA_ncRNA_120          | 1021704               | 1021801 | +                             | A              | 1021704                | 1021801 | 1.04    | 7.09     | 1.2      | 3           | 10.96    | 9.92    | 44.15    | 25.97    | 62.44    | 252.69   |
| <b>SMA_Hfq_ncRNA_8</b> | 1086740               | 1086846 | -                             | A              | 1086740                | 1086846 | 1.38    | 11.02    | 0.8      | 4.67        | 7.71     | 9.08    | 48.53    | 23.79    | 171.57   | 244.66   |
| SmelC500               | 2180099               | 2180274 | -                             | C              | 2180099                | 2180274 | 0.67    | 2.81     | 0.75     | 2.5         | 5.48     | 60.75   | 103.26   | 19.28    | 69.54    | 140.7    |
| <b>SmelC781</b>        | 3539507               | 3539650 | +                             | C              | 3539507                | 3539650 | 0.15    | 17.12    | 0.05     | 0.72        | 10.6     | 47.25   | 2367.84  | 17.68    | 382.45   | 4530.24  |
| SMc_ncRNA_263          | 2179479               | 2179575 | -                             | C              | 2179479                | 2179575 | 0.92    | 1.05     | 0.6      | 1.33        | 6.29     | 30.06   | 8.92     | 17.49    | 31.54    | 218.83   |



**Table S2.** Cont.

| sRNA name <sup>1</sup> | CoIP-RNA <sup>2</sup> |         | GenDB annotation <sup>2</sup> |                | Enrichment in CoIP-RNA |         |         |          |          |          | RPKM values |         |          |          |          |          |
|------------------------|-----------------------|---------|-------------------------------|----------------|------------------------|---------|---------|----------|----------|----------|-------------|---------|----------|----------|----------|----------|
|                        | start                 | stop    | S <sup>3</sup>                | R <sup>4</sup> | start                  | stop    | Hfq-log | Hfq-stat | Hfq-cold | Hfq-heat | Hfq-salt    | Hfq-log | Hfq-stat | Hfq-cold | Hfq-heat | Hfq-salt |
| SMb_Hfq_ncRNA_1        | 242108                | 242215  | +                             | B              | 242108                 | 242215  | 0.83    | 31.18    | 0.45     | 4        | 1.98        | 9       | 256.42   | 15.71    | 198.31   | 78.62    |
| SMc_Hfq_ncRNA_3        | 1398540               | 1398649 | +                             | C              | 1398540                | 1398649 | 0.52    | 1.18     | 0.3      | 0.67     | 5.78        | 8.84    | 7.87     | 15.43    | 27.81    | 360.2    |
| <b>SmelC507</b>        | 2206348               | 2206579 | +                             | C              | 2206348                | 2206579 | 0.17    | 52.82    | 0.13     | 2        | 0.42        | 37.71   | 5084.24  | 14.63    | 290.14   | 45.75    |
| SmelC139               | 816486                | 816553  | -                             | C              | 816486                 | 816553  | 0.37    | 45.9     | 0.01     | 3.19     | 2.62        | 57.18   | 3448.89  | 12.48    | 11428.58 | 7158.66  |
| SMc_ncRNA_262          | 2153309               | 2153455 | +                             | C              | 2153309                | 2153455 | 1.99    | 12.99    | 0.03     | 3.43     | 0.15        | 145.47  | 382.66   | 11.54    | 1873.24  | 57.76    |
| SmelA054               | 911299                | 911374  | +                             | A              | 911299                 | 911374  | 0.14    | 0.52     | 0.4      | 5.33     | 9.94        | 25.58   | 45.55    | 11.16    | 281.81   | 446.87   |
| SMc_ncRNA_275          | 2475875               | 2475972 | +                             | C              | 2475875                | 2475972 | 0.46    | 13.39    | 0.6      | 2        | 0.91        | 29.76   | 441.53   | 8.66     | 31.22    | 14.44    |
| SMa_Hfq_ncRNA_2        | 239707                | 239949  | -                             | A              | 239707                 | 239949  | 0.13    | 6.3      | 0.18     | 1.6      | 12.11       | 8       | 224.36   | 6.98     | 88.14    | 576.52   |

<sup>1</sup>New *S. meliloti* sRNAs discovered in this work are shaded. sRNAs with putative RpoH (H1, H2 or H1/2), RpoE2 and RpoN ( $\sigma^{54}$ ) promoters are indicated in blue, red and green color, respectively.

<sup>2</sup>Coordinates according to the annotation of the *S. meliloti* 1021 genome

<sup>3</sup>S, coding strand

<sup>4</sup>R, replicon. A, pSymA; B, pSymB; C, chromosome

**Table S3.-** Hfq-bound mRNAs.

| CoIP-RNA <sup>2</sup>   |         |         |                |           |          | Enrichment in CoIP-RNA               |         |          |          |          |          |
|-------------------------|---------|---------|----------------|-----------|----------|--------------------------------------|---------|----------|----------|----------|----------|
| Gene ID <sup>1</sup>    | Start   | Stop    | S <sup>3</sup> | ORF start | ORF stop | Gene product                         | Hfq-log | Hfq-stat | Hfq-cold | Hfq-heat | Hfq-salt |
| <b><i>Transport</i></b> |         |         |                |           |          |                                      |         |          |          |          |          |
| <b>SMa0081</b>          | 42785   | 43461   | +              | 42785     | 43441    | ABC transporter, permease            | 0.61    | 0.87     | 9.43     | 2.86     | 4.78     |
| <b>SMa0082</b>          | 43471   | 44286   | +              | 43471     | 44286    | ABC transporter, PSBP                | 6.33    | 3.23     | 2.31     | 0.4      | 1.16     |
| <b>SMa0104</b>          | 52944   | 54556   | +              | 52944     | 54536    | ABC transporter, PSBP                | 3.01    | 7.32     | 6.06     | 0.05     | 0.2      |
| <b>SMa0157</b>          | 87263   | 88324   | -              | 87283     | 88287    | ABC transporter, PSBP                | 2.57    | 16.71    | 2.77     | 0.87     | 3.26     |
| <b>SMa0252</b>          | 140349  | 141373  | +              | 140349    | 141353   | TRAP-type PSBP                       | 13.37   | 2.83     | 5.21     | 0.34     | 3.44     |
| <b>SMa0302</b>          | 167410  | 168978  | -              | 167430    | 168956   | ABC transporter, PSBP                | 5.96    | 2.66     | 1.52     | 9.18     | 2.79     |
| <b>SMa0391</b>          | 211227  | 212489  | +              | 211336    | 212469   | ABC transporter, ATP-binding protein | 2.43    | 1.17     | 2.27     | 10.1     | 1.19     |
| <b>SMa0392</b>          | 212503  | 213638  | +              | 212503    | 213618   | ABC transporter, PSBP                | 7.8     | 4.64     | 3.09     | 7.67     | 0.79     |
| <b>SMa0466</b>          | 251991  | 253645  | +              | 252021    | 253625   | ABC transporter, PSBP                | 8.51    | 29.43    | 3.97     | 3.58     | 3.25     |
| <b>SMa0495</b>          | 269279  | 270196  | -              | 269299    | 270117   | ABC transporter, PSBP                | 9.85    | 1.35     | 7.73     | 19.56    | 14.27    |
| <b>SMa0503</b>          | 273422  | 274098  | +              | 273422    | 274078   | ABC transporter, permease            | 0.25    | 1.51     | 1.54     | 1        | 7.74     |
| <b>SMa0709</b>          | 384094  | 385385  | +              | 384120    | 385385   | ABC transporter, PSBP                | 2.49    | 3.78     | 11.8     | 6        | 8.72     |
| <b>SMa0799</b>          | 435861  | 436891  | +              | 435861    | 436871   | ABC transporter, PSBP                | 5.18    | 7.48     | 2.35     | 1.69     | 1.03     |
| <b>SMa1087</b>          | 594293  | 596597  | +              | 594396    | 596597   | Cation transport ATPase              | 0.8     | 0.04     | 7.29     | 2.19     | 0.8      |
| <b>SMa1120</b>          | 609243  | 610181  | +              | 609267    | 610181   | ABC transporter, ATP-binding protein | 90.12   | 0.64     | 23.92    | 3.87     | 1.26     |
| <b>SMa1122</b>          | 610188  | 612551  | +              | 610188    | 612551   | Putative permease                    | 11.44   | 0.32     | 4.27     | 2.25     | 0.46     |
| <b>SMa1155</b>          | 630151  | 632927  | +              | 630205    | 632907   | Cation transport P-type ATPase       | 3.68    | 0.18     | 12.48    | 4        | 3.77     |
| <b>SMa1185</b>          | 652157  | 652984  | +              | 652157    | 652984   | NosY permease                        | 2.6     | 0.13     | 29       | 1.33     | 1.01     |
| <b>SMa1328</b>          | 724513  | 725889  | -              | 724533    | 725855   | Permease                             | 0.54    | 15.11    | 0.49     | 2.79     | 2.17     |
| <b>SMa1337</b>          | 731195  | 732664  | +              | 731337    | 732644   | ABC transporter, PSBP                | 3.11    | 3.85     | 2.3      | 1.89     | 5.13     |
| <b>SMa1374</b>          | 754635  | 755594  | -              | 754635    | 755594   | ABC transporter, permease            | 0.47    | 0.27     | 5.64     | 0.8      | 1.83     |
| <b>SMa1375</b>          | 756573  | 758077  | -              | 756593    | 758077   | ABC transporter, PSBP                | 8.45    | 2.36     | 14.2     | 2.83     | 2.74     |
| <b>SMa1379</b>          | 759671  | 761221  | -              | 759691    | 761166   | ABC transporter, PSBP                | 3.99    | 1.57     | 6.42     | 2.62     | 2.29     |
| <b>SMa1462</b>          | 805568  | 806478  | -              | 805588    | 806478   | ABC transporter, PSBP                | 6.06    | 2.54     | 7.8      | 4.29     | 1.22     |
| <b>SMa1646</b>          | 917347  | 918389  | -              | 917367    | 918389   | ABC transporter, ATP-binding protein | 5.58    | 1.24     | 7.63     | 2        | 10.79    |
| <b>SMa1668</b>          | 934971  | 936563  | +              | 935142    | 936563   | ArcD2 arginine/ornithine antiporter  | 0.37    | 6.41     | 0.29     | 1.15     | 3.41     |
| <b>SMa1755</b>          | 997793  | 998998  | -              | 997813    | 998865   | ABC transporter, PSBP                | 2.91    | 1.65     | 1.8      | 6.58     | 2.19     |
| <b>SMa1860</b>          | 1054935 | 1056565 | +              | 1054935   | 1056545  | ABC transporter, PSBP                | 2.07    | 292.1    | 3.72     | 6.2      | 2.56     |
| <b>SMa1862</b>          | 1056583 | 1057587 | +              | 1056637   | 1057587  | ABC transporter permease             | 2.07    | 63.78    | 0.3      | 2        | 0.91     |
| <b>SMa2127</b>          | 1201708 | 1203258 | -              | 1201708   | 1203258  | ABC transporter, ATP-binding protein | 0.83    | 0.71     | 5.2      | 1.33     | 2.13     |
| <b>SMa2199</b>          | 1231870 | 1232834 | -              | 1231890   | 1232780  | ABC transporter, PSBP                | 4.51    | 2.05     | 6        | 1.75     | 5.86     |
| <b>SMa2337</b>          | 1304774 | 1306139 | +              | 1304824   | 1306119  | RhtX rhizobactin transporter         | 0.41    | 0.94     | 0.37     | 0.46     | 13.34    |

Table S3.- Cont.

| CoIP-RNA <sup>2</sup> |         |         |                |           |          | Enrichment in CoIP-RNA                                                    |         |          |          |          |          |
|-----------------------|---------|---------|----------------|-----------|----------|---------------------------------------------------------------------------|---------|----------|----------|----------|----------|
| Gene ID <sup>1</sup>  | Start   | Stop    | S <sup>3</sup> | ORF start | ORF stop | Gene product                                                              | Hfq-log | Hfq-stat | Hfq-cold | Hfq-heat | Hfq-salt |
| <b>SMa2339</b>        | 1317985 | 1319117 | +              | 1317985   | 1319097  | Siderophore biosynthesis protein                                          | 0.69    | 0.39     | 0.11     | 0.12     | 7.14     |
| <b>SMa2414</b>        | 1315674 | 1317985 | +              | 1315745   | 1317985  | RhtA rhizobactin transporter                                              | 0.55    | 0.31     | 0.1      | 0.08     | 7.18     |
| <b>SMb20015</b>       | 21392   | 22348   | -              | 21392     | 22348    | putative sugar ABC transporter                                            | 0.52    | 0.62     | 7.2      | 2        | 1.95     |
| <b>SMb20018</b>       | 25072   | 26134   | -              | 25092     | 26114    | probable sugar transport ATP-binding protein                              | 1.15    | 3.77     | 9.62     | 0.9      | 1.75     |
| <b>SMb20058</b>       | 68748   | 69548   | +              | 68748     | 69548    | ABC transporter, ATP-binding protein                                      | 2.38    | 0.96     | 5.24     | 0.89     | 0.47     |
| <b>SMb20263</b>       | 268445  | 269344  | +              | 268518    | 269324   | putative ABC transporter periplasmic amino acid- binding protein          | 7       | 0.52     | 12.84    | 0.66     | 3.74     |
| <b>SMb20284</b>       | 288541  | 289707  | -              | 288561    | 289661   | putative ABC transporter periplasmic spermidineputrescine-binding protein | 5.15    | 2.43     | 1.23     | 4.9      | 1.89     |
| <b>SMb20289</b>       | 294213  | 295636  | -              | 294233    | 295582   | putative permease protein                                                 | 0.76    | 0.99     | 3.3      | 1.5      | 6.85     |
| <b>SMb20295</b>       | 301924  | 302915  | +              | 301924    | 302895   | putative ABC transporter                                                  | 5.57    | 8.45     | 2.43     | 1.36     | 5.34     |
| <b>SMb20315</b>       | 316605  | 317769  | +              | 316763    | 317749   | ABC transporter, permease                                                 | 0.44    | 0.25     | 1.05     | 1.33     | 19.43    |
| <b>SMb20316</b>       | 317775  | 318850  | +              | 317829    | 318830   | ABC transporter, PSBP                                                     | 5.83    | 1.35     | 2.17     | 1.48     | 21.75    |
| <b>SMb20370</b>       | 382623  | 383323  | +              | 382623    | 383303   | putative ATP-binding transport protein                                    | 5.18    | 14.65    | 4.54     | 7.43     | 16       |
| <b>SMb20383</b>       | 394220  | 395367  | -              | 394240    | 395313   | putative ABC transporter                                                  | 21.82   | 29.1     | 77.7     | 63.67    | 108.75   |
| <b>SMb20417</b>       | 431083  | 431964  | +              | 431083    | 431964   | probable glycerol-3-phosphate ABC transporter permease protein            | 2.52    | 58.38    | 3.8      | 0.44     | 5        |
| <b>SMb20428</b>       | 443289  | 444160  | +              | 443289    | 444140   | Cystine-binding periplasmic protein precursor                             | 0.78    | 7.68     | 0.71     | 1        | 2.45     |
| <b>SMb20442</b>       | 453269  | 454281  | +              | 453287    | 454261   | TRAP-type PSBP                                                            | 0.88    | 2.36     | 1.96     | 1.26     | 5.41     |
| <b>SMb20484</b>       | 499666  | 500847  | +              | 499835    | 500827   | putative ABC transporter periplasmic sugar- binding protein               | 2.31    | 2.89     | 3.92     | 0.96     | 6.02     |
| <b>SMb20508</b>       | 530432  | 531489  | -              | 530452    | 531435   | probable sugar ABC transporter                                            | 5.36    | 6.3      | 0.6      | 0.43     | 0.48     |
| <b>SMb20538</b>       | 562331  | 563698  | +              | 562392    | 563678   | probable sugar ABC transporter                                            | 2.32    | 8.89     | 1.8      | 0.91     | 5.7      |
| <b>SMb20611</b>       | 1626557 | 1627989 | -              | 1626577   | 1627935  | C4-dicarboxylate transport protein                                        | 7.2     | 0.38     | 0.75     | 0.38     | 1.27     |
| <b>SMb20620</b>       | 1639412 | 1640475 | -              | 1639432   | 1640475  | putative sugar ABC transporter                                            | 2.59    | 1.67     | 5.08     | 0.31     | 0.98     |
| <b>SMb20634</b>       | 1653907 | 1655162 | -              | 1653927   | 1655162  | putative sugar uptake ABC transporter PSBP precursor                      | 1.94    | 3.25     | 7.63     | 0.57     | 1.91     |
| <b>SMb20660</b>       | 1460912 | 1462336 | -              | 1460932   | 1462236  | putative sugar uptake ABC transporter PSBP precursor                      | 1.58    | 15.69    | 5.04     | 0.8      | 1.83     |
| <b>SMb20673</b>       | 1474322 | 1475965 | -              | 1474322   | 1475902  | putative sugar uptake ABC transporter ATP- binding protein                | 3.04    | 7.34     | 0.36     | 6.92     | 10.11    |
| <b>SMb20706</b>       | 1508244 | 1509077 | +              | 1508281   | 1509057  | putative amino acid uptake ABC transporter PSBP precursor                 | 4.75    | 0.94     | 36.34    | 0.53     | 13.06    |
| <b>SMb20714</b>       | 1517030 | 1518129 | +              | 1517084   | 1518109  | ABC transporter, permease                                                 | 13.43   | 24.18    | 2.17     | 1.38     | 26.64    |
| <b>SMb20720</b>       | 1524513 | 1525483 | +              | 1524513   | 1525463  | putative sugar uptake ABC transporter PSBP precursor                      | 2.72    | 1.3      | 5.7      | 0.5      | 1.22     |
| <b>SMb20856</b>       | 1260885 | 1261927 | -              | 1260905   | 1261873  | ABC transporter, PSBP                                                     | 1.48    | 1.01     | 4.89     | 3.43     | 23.04    |
| <b>SMb20893</b>       | 1300065 | 1301299 | -              | 1300085   | 1301299  | ABC transporter, permease                                                 | 2.03    | 2        | 4.23     | 1        | 5.88     |
| <b>SMb20895</b>       | 1303007 | 1304243 | -              | 1303027   | 1304094  | ABC transporter, PSBP                                                     | 0.69    | 0.93     | 1.04     | 1.44     | 7.67     |
| <b>SMb20902</b>       | 1311579 | 1312743 | +              | 1311686   | 1312723  | ABC transporter, PSBP                                                     | 1.44    | 13.08    | 1.09     | 0.62     | 7.61     |
| <b>SMb20931</b>       | 1154816 | 1156074 | +              | 1154870   | 1156054  | ABC transporter, PSBP                                                     | 1.59    | 10.28    | 2.25     | 1        | 1.01     |
| <b>SMb21114</b>       | 755247  | 756592  | -              | 755267    | 756592   | NrtA nitrate transport protein                                            | 0.91    | 1.18     | 0.27     | 5.27     | 1.99     |

Table S3.- Cont.

| CoIP-RNA <sup>2</sup> |         |         |                |           |          | Enrichment in CoIP-RNA                                                      |         |          |          |          |          |
|-----------------------|---------|---------|----------------|-----------|----------|-----------------------------------------------------------------------------|---------|----------|----------|----------|----------|
| Gene ID <sup>1</sup>  | Start   | Stop    | S <sup>3</sup> | ORF start | ORF stop | Gene product                                                                | Hfq-log | Hfq-stat | Hfq-cold | Hfq-heat | Hfq-salt |
| <b>SMB21131</b>       | 770163  | 771044  | -              | 770163    | 771044   | ABC-type sulfate transport system, periplasmic component                    | 0.82    | 8.73     | 1.81     | 0.77     | 1.02     |
| <b>SMB21135</b>       | 774326  | 775258  | +              | 774396    | 775238   | ABC transporter, PSBP                                                       | 8.71    | 1.89     | 0.19     | 4.15     | 0.42     |
| <b>SMB21144</b>       | 888494  | 889496  | +              | 888559    | 889476   | putative choline uptake ABC transporter PSBP precursor                      | 1.1     | 11.66    | 0.69     | 0.86     | 1.35     |
| <b>SMB21151</b>       | 895555  | 896804  | +              | 895555    | 896784   | ABC transporter, PSBP                                                       | 5.66    | 7.19     | 4.76     | 3.87     | 2.43     |
| <b>SMB21196</b>       | 944982  | 946636  | +              | 945018    | 946616   | ABC transporter, PSBP                                                       | 4.52    | 6.37     | 5.78     | 0.38     | 1.64     |
| <b>SMB21215</b>       | 968075  | 969756  | -              | 968095    | 969702   | putative dipeptide uptake ABC transporter PSBP precursor                    | 2.19    | 0.35     | 6.9      | 0.17     | 0.58     |
| <b>SMB21220</b>       | 782613  | 783548  | -              | 782613    | 783494   | ABC transporter, permease                                                   | 0.61    | 0.56     | 1.56     | 1.2      | 7.79     |
| <b>SMB21221</b>       | 783717  | 785029  | -              | 783737    | 784975   | ABC transporter, PSBP                                                       | 14.15   | 1.48     | 4.89     | 4.71     | 7.04     |
| <b>SMB21330*</b>      | 998495  | 998766  | +              | 998537    | 998746   | hypothetical protein with amino acid permeases signature                    | 0.18    | 35.68    | 0.1      | 1.49     | 6.03     |
| <b>SMB21343</b>       | 1008768 | 1009772 | -              | 1008768   | 1009772  | ABC transporter, permease                                                   | 0.52    | 0.47     | 1.4      | 1.33     | 6.9      |
| <b>SMB21353</b>       | 1018467 | 1019464 | -              | 1018487   | 1019464  | ABC transporter, PSBP                                                       | 1.45    | 17.8     | 1.92     | 1.4      | 1.46     |
| <b>SMB21375</b>       | 1039944 | 1040926 | -              | 1039964   | 1040926  | ABC transporter, permease                                                   | 0.41    | 0.94     | 0.11     | 0.36     | 12.28    |
| <b>SMB21376</b>       | 1040923 | 1042488 | -              | 1040923   | 1042434  | ABC transporter, ATP-binding protein                                        | 1.86    | 0.5      | 0.16     | 0.13     | 352.15   |
| <b>SMB21377</b>       | 1042516 | 1043502 | -              | 1042536   | 1043426  | ABC transporter, PSBP                                                       | 9.53    | 5.36     | 0.65     | 2.99     | 555.95   |
| <b>SMB21430</b>       | 1360613 | 1361737 | -              | 1360613   | 1361683  | putative iron ABC transporter permease protein                              | 0.25    | 0.31     | 2.25     | 0.5      | 7.56     |
| <b>SMB21431</b>       | 1361790 | 1362232 | -              | 1361810   | 1362232  | possibly C terminus of iron ABC transporter PSBP                            | 1.17    | 0.59     | 1.48     | 0.27     | 12.13    |
| <b>SMB21432</b>       | 1362235 | 1362965 | -              | 1362235   | 1362942  | putative iron uptake ABC transporter PSBP precursor                         | 0.79    | 0.43     | 0.88     | 0.53     | 8.3      |
| <b>SMB21461</b>       | 1387331 | 1388639 | -              | 1387351   | 1388613  | putative sugar uptake ABC transporter PSBP precursor                        | 4.78    | 3.94     | 0.84     | 7.63     | 2.1      |
| <b>SMB21506</b>       | 1431320 | 1433038 | -              | 1431320   | 1432936  | probable exopolysaccharide transport protein                                | 1.53    | 1.25     | 6.93     | 0.18     | 0.61     |
| <b>SMB21507</b>       | 1433011 | 1433815 | +              | 1433139   | 1433795  | putative amino acid exporter                                                | 0.52    | 3.15     | 0.15     | 1.67     | 5.43     |
| <b>SMB21526</b>       | 1050876 | 1051993 | +              | 1050954   | 1051973  | ABC transporter, PSBP                                                       | 8.55    | 10.34    | 6        | 4        | 8.03     |
| <b>SMB21572</b>       | 1110834 | 1111950 | +              | 1110929   | 1111930  | putative amino acid uptake ABC transporter PSBP precursor                   | 23.7    | 25.84    | 6.04     | 59.65    | 12.8     |
| <b>SMB21604</b>       | 1144842 | 1146157 | -              | 1144862   | 1146124  | putative sugar uptake ABC transporter PSBP precursor                        | 10.26   | 26.36    | 8.82     | 2        | 5.95     |
| <b>SMB21644</b>       | 1672399 | 1674089 | -              | 1672419   | 1674089  | AgpD                                                                        | 1.04    | 1.07     | 5.6      | 2.67     | 2.03     |
| <b>SMB21647</b>       | 1676336 | 1678555 | -              | 1676356   | 1678437  | periplasmic alpha-galactoside binding protein                               | 1.62    | 0.94     | 17.56    | 0.36     | 1.66     |
| <b>SMC00052</b>       | 1087406 | 1087825 | +              | 1087406   | 1087825  | Probable Na(+)/H(+) antiporter                                              | 1.01    | 0.18     | 5.44     | 0.37     | 0.91     |
| <b>SMC00056</b>       | 1090244 | 1090615 | +              | 1090244   | 1090615  | Probable Na(+)/H(+)-antiporter                                              | 1.56    | 0.51     | 7        | 1.33     | 0.81     |
| <b>SMC00078</b>       | 1011516 | 1012711 | -              | 1011536   | 1012642  | Putative methionine ABC transporter, PSBP                                   | 31.67   | 3.36     | 11.82    | 8.28     | 2.42     |
| <b>SMC00139</b>       | 2031433 | 2032386 | +              | 2031583   | 2032386  | Amino acid transport system permease                                        | 7.65    | 0.24     | 11.4     | 2.92     | 2.92     |
| <b>SMC00140</b>       | 2030457 | 2031340 | +              | 2030538   | 2031320  | Putative amino-acid binding periplasmic protein                             | 5.24    | 0.64     | 2.77     | 3.96     | 1.53     |
| <b>SMC00265</b>       | 1833337 | 1834401 | -              | 1833357   | 1834367  | Putative oxobutyric acid and 3-methyl oxovaleric acid ABC transporter, PSBP | 3.19    | 9.75     | 4.5      | 0.13     | 0.95     |
| <b>SMC00245</b>       | 1812104 | 1813815 | -              | 1812104   | 1813690  | Putative ABC transporter ATP-binding protein                                | 21.73   | 4.8      | 25.33    | 11.82    | 2.8      |
| <b>SMC00671</b>       | 2908957 | 2909868 | +              | 2909011   | 2909868  | Histidine ABC transporter, permease                                         | 0.83    | 0.47     | 5.05     | 3.29     | 0.25     |

Table S3.- Cont.

| CoIP-RNA <sup>2</sup> |         |         |                |           |          | Enrichment in CoIP-RNA                                                   |         |          |          |          |          |
|-----------------------|---------|---------|----------------|-----------|----------|--------------------------------------------------------------------------|---------|----------|----------|----------|----------|
| Gene ID <sup>1</sup>  | Start   | Stop    | S <sup>3</sup> | ORF start | ORF stop | Gene product                                                             | Hfq-log | Hfq-stat | Hfq-cold | Hfq-heat | Hfq-salt |
| SMc00672              | 2907840 | 2908894 | +              | 2907840   | 2908874  | Histidine ABC transporter, periplasmic solute- binding protein           | 7.17    | 5.39     | 17.58    | 19.35    | 0.32     |
| SMc00770              | 783174  | 784368  | +              | 783254    | 784348   | Probable putrescine-binding periplasmic protein                          | 9.32    | 2.09     | 4.59     | 3.38     | 3.41     |
| SMc00771              | 784397  | 785611  | +              | 784466    | 785611   | Probable putrescine transport ATP-binding protein                        | 2.65    | 0.67     | 2.97     | 4.86     | 14.46    |
| SMc00784              | 805282  | 806393  | -              | 805302    | 806345   | Fe <sup>3+</sup> ABC transporter                                         | 6.4     | 23.62    | 2.53     | 1.07     | 19.66    |
| SMc01094              | 464397  | 465625  | -              | 464417    | 465625   | Putative multidrug efflux system transmembrane protein                   | 3.93    | 4.72     | 1.64     | 10.77    | 0.42     |
| SMc01496              | 2633056 | 2634427 | -              | 2633076   | 2634386  | Putative C6 polyol ABC transporter, PSBP                                 | 2.47    | 5.45     | 3.3      | 1.07     | 137.46   |
| SMc01497              | 2632014 | 2632960 | -              | 2632014   | 2632886  | Putative C6 polyol ABC transporter, permease component                   | 0.62    | 0.33     | 1        | 0.19     | 10.7     |
| SMc01498              | 2631158 | 2632008 | -              | 2631178   | 2632008  | Putative C6 polyol ABC transporter, permease component                   | 1.95    | 0.29     | 1.25     | 0.67     | 12.78    |
| SMc01499              | 2630146 | 2631147 | -              | 2630146   | 2631147  | Putative C6 polyol ABC transporter, ATP-binding component                | 1.92    | 0.26     | 1.4      | 0.4      | 31.86    |
| SMc01510              | 2619659 | 2620467 | +              | 2619659   | 2620447  | Putative hemin transport system ATP-binding ABC transporter              | 0.3     | 1.01     | 0.13     | 0.44     | 8.12     |
| SMc01511              | 2618550 | 2619650 | +              | 2618550   | 2619650  | Putative hemin transport system permease transmembrane protein           | 1.3     | 1.48     | 0.13     | 0.3      | 5.07     |
| SMc01512              | 2617595 | 2618545 | +              | 2617595   | 2618545  | Putative hemin binding periplasmic transmembrane protein                 | 0.59    | 1.86     | 0.17     | 0.25     | 7.58     |
| SMc01513              | 2616470 | 2617557 | +              | 2616470   | 2617537  | Putative hemin transport protein                                         | 1.63    | 9.74     | 0.11     | 0.11     | 4.61     |
| SMc01525              | 2607411 | 2609109 | -              | 2607431   | 2609071  | Putative dipeptide binding periplasmic protein                           | 25.64   | 2.23     | 10.68    | 8.8      | 9.12     |
| SMc01597              | 2390461 | 2392082 | -              | 2390481   | 2392028  | Putative amino-acid permease                                             | 18.27   | 14.35    | 4.76     | 10.12    | 1.75     |
| SMc01605              | 2394103 | 2395268 | +              | 2394145   | 2395248  | Putative periplasmic binding ABC transporter                             | 7.58    | 11.22    | 6.83     | 5.43     | 1.91     |
| SMc01631              | 2423322 | 2424486 | +              | 2423387   | 2424466  | ABC transporter ATP-binding protein                                      | 3.98    | 13.99    | 5        | 17.05    | 7.88     |
| SMc01632              | 2424518 | 2425701 | +              | 2424518   | 2425681  | Substrate-binding periplasmic protein precursor                          | 2.9     | 16.42    | 2.28     | 7.87     | 2.23     |
| SMc01642              | 2436766 | 2438409 | +              | 2436820   | 2438409  | ABC transporter, PSBP, mediates the uptake of proline betaine            | 7.13    | 2.07     | 3.63     | 2.89     | 2.65     |
| SMc01647              | 2442860 | 2444523 | +              | 2442914   | 2444503  | Probable ABC transporter                                                 | 5.39    | 2.99     | 2.33     | 0.35     | 2.65     |
| SMc01652              | 2449136 | 2450388 | +              | 2449208   | 2450368  | Putative putrescine and agmatine ABC transporter, PSBP                   | 11.83   | 1.84     | 3.71     | 2.59     | 1.61     |
| SMc01657              | 2455049 | 2457272 | +              | 2455078   | 2457252  | Putative ferrichrome-iron receptor precursor protein                     | 1.04    | 1.42     | 0.1      | 0.36     | 11.64    |
| SMc01659              | 2458016 | 2459169 | +              | 2458016   | 2459149  | Putative ABC transporter, periplasmic component                          | 0.55    | 1.74     | 0.18     | 0.31     | 10.49    |
| SMc01826              | 2649289 | 2650178 | +              | 2649289   | 2650158  | Putative uracil and uridine ABC transporter, permease component          | 3.02    | 3.5      | 18.82    | 9.12     | 12.67    |
| SMc01827              | 2650188 | 2651200 | +              | 2650188   | 2651180  | Putative uracil and uridine ABC transporter, ATP- binding component      | 10.18   | 2.8      | 14.38    | 13.41    | 1.13     |
| SMc01869              | 2340687 | 2342158 | +              | 2340828   | 2342138  | Probable MFS permease                                                    | 1.64    | 1.24     | 2.07     | 0.44     | 6.9      |
| SMc01946              | 2668369 | 2669561 | -              | 2668389   | 2669507  | Putative leucine-specific binding protein precursor                      | 11.69   | 3.07     | 28.79    | 6.94     | 2.26     |
| SMc01948              | 2669972 | 2670717 | -              | 2669992   | 2670717  | Probable branched-chain amino acid transport ATP-binding ABC transporter | 2.48    | 0.43     | 11.53    | 1.11     | 1.19     |
| SMc01950              | 2671601 | 2672986 | -              | 2671601   | 2672986  | ABC-type branched-chain amino acid transport system, permease component  | 1.38    | 0.23     | 7.89     | 0.79     | 0.62     |
| SMc01951              | 2672991 | 2674046 | -              | 2672991   | 2673893  | Probable branched-chain amino acid transport permease ABC transporter    | 19.4    | 6.39     | 46.8     | 8.34     | 10.16    |
| SMc01966              | 2688018 | 2689155 | -              | 2688038   | 2689117  | Putative spermidine/putrescine-binding periplasmic ABC transporter       | 2.49    | 2.73     | 2.67     | 6        | 2.37     |
| SMc01977              | 2701474 | 2702756 | +              | 2701474   | 2702736  | Sugar-binding periplasmic protein precursor                              | 4.15    | 8.11     | 2.29     | 8.17     | 1.65     |
| SMc02021              | 2724206 | 2725378 | -              | 2724226   | 2725260  | Putative organic acid ABC transporter, PSBP                              | 1.56    | 11.81    | 0.92     | 0.46     | 1.73     |

Table S3.- Cont.

| CoIP-RNA <sup>2</sup> |         |         |                |           |          | Enrichment in CoIP-RNA                                                   |         |          |          |          |          |
|-----------------------|---------|---------|----------------|-----------|----------|--------------------------------------------------------------------------|---------|----------|----------|----------|----------|
| Gene ID <sup>1</sup>  | Start   | Stop    | S <sup>3</sup> | ORF start | ORF stop | Gene product                                                             | Hfq-log | Hfq-stat | Hfq-cold | Hfq-heat | Hfq-salt |
| SMc02025              | 2728693 | 2730257 | -              | 2728713   | 2730257  | Periplasmic dipeptide transport protein precursor                        | 2.25    | 0.66     | 6.37     | 2.5      | 2.13     |
| SMc02033              | 2738642 | 2739918 | -              | 2738662   | 2739849  | Sugar-binding periplasmic protein precursor.                             | 1.59    | 0.62     | 3.18     | 1.4      | 100.13   |
| SMc02079              | 1635529 | 1636959 | +              | 1635650   | 1636939  | Long-chain fatty acid transport protein precursor                        | 4.6     | 5.44     | 13.11    | 0.58     | 1.33     |
| SMc02084              | 1627335 | 1627760 | +              | 1627335   | 1627760  | Probable biopolymer transport transmembrane protein                      | 0.93    | 0.71     | 0.71     | 0.24     | 6.48     |
| SMc02085              | 1626219 | 1627328 | +              | 1626342   | 1627328  | Probable biopolymer transport transmembrane protein                      | 0.41    | 0.47     | 0.35     | 0.12     | 5.39     |
| SMc02118              | 1592063 | 1593200 | -              | 1592083   | 1593108  | Probable general L-amino acid-binding periplasmic ABC transporter        | 34.66   | 25.47    | 13.29    | 16.44    | 11.86    |
| SMc02119              | 1590785 | 1592032 | -              | 1590785   | 1591978  | Probable general L-amino acid transport permease ABC transporter         | 23.24   | 6.2      | 14.49    | 6.2      | 6.58     |
| SMc02120              | 1589626 | 1590780 | -              | 1589626   | 1590780  | Probable general L-amino acid transport permease ABC transporter         | 5.15    | 0.95     | 12.53    | 2.06     | 7.81     |
| SMc02121              | 1588811 | 1589622 | -              | 1588831   | 1589607  | Probable general L-amino acid transport ATP- binding ABC transporter     | 11.46   | 4.14     | 26.01    | 6.62     | 7.15     |
| SMc02161              | 534624  | 535979  | +              | 534724    | 535959   | Probable MFS permease                                                    | 1.2     | 0.15     | 1.7      | 1.33     | 5.38     |
| SMc02146              | 566599  | 567769  | +              | 566715    | 567749   | Phosphate binding periplasmic protein                                    | 3.49    | 6.25     | 0.37     | 4.62     | 0.5      |
| SMc02167              | 527060  | 527700  | +              | 527060    | 527680   | Putative fructose transport system kinase                                | 0.74    | 1.69     | 0.18     | 0.17     | 5.77     |
| SMc02171              | 523795  | 524937  | +              | 523892    | 524917   | Putative fructose ABC-type transport system, periplasmic component       | 1.33    | 17.97    | 0.09     | 0.35     | 7.55     |
| SMc02219              | 581426  | 582369  | +              | 581426    | 582349   | Putative amino acid-binding periplasmic protein precursor                | 0.19    | 7.96     | 0.07     | 1.69     | 0.09     |
| SMc02258              | 623300  | 624079  | -              | 623300    | 624025   | Amino-acid ABC transporter permease                                      | 3.79    | 0.65     | 6.45     | 6.5      | 4.57     |
| SMc02259              | 624113  | 624915  | -              | 624133    | 624915   | Putative periplasmic binding ABC transporter                             | 10.94   | 1.63     | 14.01    | 29.4     | 3.9      |
| SMc02260              | 624932  | 625829  | -              | 624952    | 625806   | Amino-acid transport ATP-binding protein                                 | 17.52   | 4.56     | 18.23    | 34.11    | 61.37    |
| SMc02324              | 695030  | 696093  | +              | 695084    | 696073   | ABC transporter , periplasmic rhamnase binding protein                   | 2.25    | 5.53     | 3.97     | 0.75     | 3.42     |
| SMc02337              | 2757705 | 2759210 | -              | 2757705   | 2759210  | ABC sugar transporter, fused ATP-binding domains                         | 0.87    | 0.5      | 1        | 2        | 7.3      |
| SMc02356              | 2777440 | 2778686 | +              | 2777494   | 2778666  | Putative branched chain amino acid binding periplasmic ABC transporter   | 3.6     | 2.24     | 21.19    | 7.75     | 4.41     |
| SMc02378              | 1132381 | 1133453 | +              | 1132435   | 1133433  | Probable glycine betaine ABC transporter, PSBP                           | 29.24   | 1.73     | 9.62     | 0.71     | 3.55     |
| SMc02379              | 1133568 | 1134561 | +              | 1133654   | 1134541  | Probable glycine betaine ABC transporter, permease                       | 67.94   | 12.68    | 51.02    | 8.07     | 19.24    |
| SMc02417              | 2789060 | 2790811 | +              | 2789229   | 2790791  | Putative allantoin and other purine derivative ABC transporter, PSBP     | 3.28    | 1.97     | 7.8      | 10       | 14.61    |
| SMc02471              | 3325288 | 3326675 | -              | 3325308   | 3326612  | Putative periplasmic binding ABC transporter                             | 2.43    | 6.19     | 2.56     | 0.84     | 3.81     |
| SMc02484              | 3310806 | 3311506 | -              | 3310806   | 3311450  | Amino acid efflux protein                                                | 1.49    | 0.38     | 8.23     | 1.71     | 1.22     |
| SMc02514              | 3277157 | 3278941 | +              | 3277197   | 3278921  | Putative glycerol- 3-phosphate and glycerol ABC transporter, PSBP        | 2.43    | 32.48    | 1.21     | 1.9      | 2.27     |
| SMc02518              | 3273913 | 3274983 | +              | 3273913   | 3274983  | Putative glycerol- 3-phosphate and glycerol ABC transporter, ATP-binding | 11.06   | 17.72    | 6.17     | 17.71    | 9.74     |
| SMc02519              | 3272819 | 3273909 | +              | 3272819   | 3273889  | Putative glycerol- 3-phosphate and glycerol ABC transporter, ATP-binding | 4.47    | 3.63     | 1.85     | 6.36     | 1.83     |
| SMc02616              | 109181  | 110598  | -              | 109201    | 110598   | Amino acid transporter                                                   | 0.69    | 12.86    | 0.82     | 0.5      | 0.53     |
| SMc02737              | 2591057 | 2592119 | +              | 2591143   | 2592099  | Putative choline ABC transporter, PSBP                                   | 18.48   | 1.52     | 6.97     | 2.11     | 2.52     |
| SMc02772              | 22130   | 23124   | +              | 22130     | 23104    | Putative D-fucose, pyruvic acid or L-fucose ABC transporter, permease    | 1.31    | 6.71     | 1.2      | 0.31     | 2.29     |
| SMc02774              | 19363   | 20451   | +              | 19442     | 20431    | Putative D-fucose, pyruvic acid or L-fucose ABC transporter, PSBP        | 10.37   | 20.72    | 15.23    | 2.54     | 20.88    |
| SMc02832              | 180119  | 182085  | -              | 180139    | 181998   | Putative taurine, valine, isoleucine and leucine ABC transporter, PSBP   | 4.88    | 4.98     | 2.45     | 2.44     | 7.2      |

Table S3.- Cont.

| CoIP-RNA <sup>2</sup>                                                              |         |         |                |           |          | Enrichment in CoIP-RNA                                                |         |          |          |          |          |
|------------------------------------------------------------------------------------|---------|---------|----------------|-----------|----------|-----------------------------------------------------------------------|---------|----------|----------|----------|----------|
| Gene ID <sup>1</sup>                                                               | Start   | Stop    | S <sup>3</sup> | ORF start | ORF stop | Gene product                                                          | Hfq-log | Hfq-stat | Hfq-cold | Hfq-heat | Hfq-salt |
| SMc02871                                                                           | 226852  | 227691  | -              | 226852    | 227691   | Putative ABC transporter                                              | 13.43   | 7.19     | 6.31     | 2        | 2.27     |
| SMc02873                                                                           | 228900  | 230231  | -              | 228920    | 230179   | Probable ABC transporter                                              | 14.88   | 7.38     | 5.14     | 1.85     | 0.75     |
| SMc03061                                                                           | 757652  | 759152  | +              | 757756    | 759132   | Alpha-glucosides ABC transporter, PSBP                                | 2.35    | 0.69     | 7.72     | 0.24     | 0.43     |
| SMc03062                                                                           | 759311  | 760394  | +              | 759384    | 760394   | Alpha-glucosides ABC transporter, permease component                  | 0.78    | 0.04     | 5.12     | 0.14     | 0.24     |
| SMc03065                                                                           | 763243  | 764351  | +              | 763243    | 764331   | Alpha-glucosides ABC transporter, ATP binding component               | 2.49    | 0.07     | 14       | 0.15     | 0.43     |
| SMc03196                                                                           | 3159884 | 3160735 | +              | 3159930   | 3160715  | Putative molybdate-binding periplasmic ABC transporter                | 2.19    | 5.1      | 0.61     | 2.96     | 0.93     |
| SMc03807                                                                           | 3471607 | 3472982 | +              | 3471607   | 3472962  | Probable ammonium transporter                                         | 8.9     | 5        | 4.42     | 4.5      | 38.88    |
| SMc03269                                                                           | 3386367 | 3387985 | +              | 3386367   | 3387965  | Periplasmic dipeptide transport protein precursor                     | 8.07    | 3.02     | 5.07     | 1.86     | 3.42     |
| SMc03813                                                                           | 3480131 | 3481164 | -              | 3480151   | 3481164  | Putative periplasmic binding ABC transporter                          | 1.58    | 7.09     | 3.9      | 1.75     | 6.16     |
| SMc03972                                                                           | 2967677 | 2968972 | -              | 2967677   | 2968834  | Putative multidrug efflux system transmembrane protein                | 2.39    | 0.62     | 2.54     | 0.85     | 7.84     |
| SMc03814                                                                           | 3481183 | 3482210 | -              | 3481203   | 3482210  | Sugar transport system permease                                       | 1.12    | 6.54     | 0.75     | 1.3      | 1.95     |
| SMc03991                                                                           | 2988000 | 2989888 | +              | 2988054   | 2989868  | Probable ABC transporter ATP-binding transmembrane protein            | 6.93    | 0.27     | 11.63    | 0.69     | 0.96     |
| SMc04036                                                                           | 3038922 | 3040625 | +              | 3038922   | 3040625  | Putative amino acid or peptide ABC transporter, ATP-binding component | 1.56    | 9.3      | 3.75     | 5.75     | 5.55     |
| SMc04037                                                                           | 3040644 | 3042158 | +              | 3040644   | 3042158  | Putative amino acid or peptide ABC transporter, PSBP                  | 2.45    | 17.16    | 3.17     | 8.22     | 1.52     |
| SMc04087                                                                           | 3626509 | 3628033 | +              | 3626622   | 3628013  | MFS-type transport protein                                            | 0.68    | 1.89     | 5.26     | 0.35     | 1.93     |
| SMc04127                                                                           | 147683  | 149342  | +              | 147807    | 149342   | Sugar ABC transporter, ATP-binding protein                            | 3.19    | 2.27     | 5.51     | 3.8      | 4.64     |
| SMc04135                                                                           | 136542  | 137892  | -              | 136542    | 137825   | Putative amino acid or peptide ABC transporter, PSBP                  | 1       | 3.97     | 1.01     | 2.21     | 8.39     |
| SMc04251                                                                           | 2077346 | 2078650 | -              | 2077366   | 2078472  | Probable periplasmic mannitol-binding protein                         | 5.41    | 5.03     | 11.19    | 0.33     | 1.21     |
| SMc04147                                                                           | 121668  | 123596  | +              | 121792    | 123576   | Putative amino-acid permease                                          | 2.19    | 12.6     | 7.27     | 5.25     | 4.72     |
| SMc04259                                                                           | 2087727 | 2089009 | -              | 2087747   | 2088982  | Putative gentiobiose, salicin, and cellobiose ABC transporter, PSBP   | 0.72    | 13.69    | 0.97     | 0.37     | 0.99     |
| SMc04289                                                                           | 2209107 | 2210396 | -              | 2209127   | 2210266  | Solute-binding protein                                                | 2.51    | 17.8     | 1.5      | 2.5      | 3.2      |
| SMc04293                                                                           | 2110798 | 2112414 | -              | 2110798   | 2112414  | Putative peptide-binding periplasmic ABC transporter                  | 2.65    | 19.7     | 12.35    | 2.35     | 0.93     |
| SMc04294                                                                           | 2112436 | 2113376 | -              | 2112456   | 2113376  | Putative peptide ABC transporter                                      | 1.08    | 4.52     | 9.47     | 1.11     | 4.19     |
| SMc04407                                                                           | 3613811 | 3615828 | -              | 3613831   | 3615780  | MFS-type transport protein                                            | 1.56    | 297.33   | 1.22     | 1.36     | 5.09     |
| SMc04439                                                                           | 2130901 | 2131868 | +              | 2130955   | 2131848  | Putative ABC-transporter ATP-binding protein                          | 19.98   | 1.17     | 5.31     | 0.62     | 2.61     |
| <b><i>Small and macromolecule metabolism. Energy production and conversion</i></b> |         |         |                |           |          |                                                                       |         |          |          |          |          |
| SMa0005                                                                            | 4454    | 5446    | +              | 4454      | 5446     | formate dehydrogenase-O, iron-sulfur subunit                          | 2.47    | 26.43    | 0.72     | 0.8      | 0.61     |
| SMa0034                                                                            | 19453   | 21178   | -              | 19453     | 21108    | Serralysin-like metalloprotease                                       | 5.99    | 0.93     | 2.12     | 0.46     | 0.56     |
| SMa0059                                                                            | 30703   | 31488   | -              | 30703     | 31488    | dehydrogenase related to short chain alcohol dehydrogenases           | 0.75    | 1.72     | 1.8      | 1.5      | 11.41    |
| SMa0101                                                                            | 51213   | 52907   | +              | 51262     | 52887    | Amidohydrolase                                                        | 3.8     | 9.28     | 9.79     | 0.15     | 0.31     |
| SMa0187                                                                            | 102630  | 103622  | +              | 102649    | 103602   | dehydrogenase related to short chain alcohol dehydrogenases           | 1.09    | 35.81    | 1.12     | 2.31     | 1.35     |
| SMa0233                                                                            | 129280  | 130741  | -              | 129300    | 130691   | OtsA trehalose-6-phosphate synthase                                   | 0.76    | 9.95     | 0.1      | 0.76     | 1.76     |
| SMa0680                                                                            | 364033  | 366401  | -              | 364053    | 366401   | decarboxylase (lysine, ornithine, arginine)                           | 3.07    | 0.34     | 5.6      | 2        | 1.01     |

Table S3.- Cont.

| CoIP-RNA <sup>2</sup> |         |         |                |           |          | Enrichment in CoIP-RNA                                        |         |          |          |          |          |
|-----------------------|---------|---------|----------------|-----------|----------|---------------------------------------------------------------|---------|----------|----------|----------|----------|
| Gene ID <sup>1</sup>  | Start   | Stop    | S <sup>3</sup> | ORF start | ORF stop | Gene product                                                  | Hfq-log | Hfq-stat | Hfq-cold | Hfq-heat | Hfq-salt |
| <b>SMa0693</b>        | 375551  | 376957  | +              | 375708    | 376937   | ArcA1 arginine deiminase                                      | 1       | 0.03     | 15.3     | 2        | 4.57     |
| <b>SMa0695</b>        | 376973  | 377977  | +              | 376973    | 377977   | ArcB, ornithine carbamoyltransferase, catabolic               | 6.55    | 0.87     | 3.86     | 1.14     | 2.09     |
| <b>SMa0697</b>        | 377980  | 378974  | +              | 377980    | 378954   | ArcC carbamate kinase                                         | 8.84    | 0.41     | 4.8      | 1.67     | 1.22     |
| <b>SMa0943</b>        | 526345  | 528126  | +              | 526469    | 528106   | arylsulfatase                                                 | 15.21   | 28       | 33.97    | 2.25     | 3.5      |
| <b>SMa1084</b>        | 591045  | 593494  | -              | 591065    | 593440   | phosphoketolase                                               | 6.48    | 0.1      | 20.7     | 2        | 1.13     |
| <b>SMa1126</b>        | 613754  | 614892  | -              | 613774    | 614892   | Protease                                                      | 3.02    | 0.04     | 17.31    | 2.57     | 0.43     |
| <b>SMa1128</b>        | 614926  | 616295  | -              | 614946    | 616274   | DegP4 protease like protein                                   | 3.35    | 0.04     | 127.8    | 19       | 4.87     |
| <b>SMa1131</b>        | 616449  | 618092  | -              | 616469    | 618064   | Metallo-beta-lactamase superfamily protein                    | 0.96    | 0.01     | 18.07    | 4        | 0.68     |
| <b>SMa1156</b>        | 632953  | 634100  | -              | 632973    | 634046   | Alcohol dehydrogenase, Zn-dependent class III                 | 3.29    | 0.11     | 12.18    | 0.92     | 1.03     |
| <b>SMa1166</b>        | 639848  | 640965  | +              | 639902    | 640945   | Protein containing an alpha/beta hydrolase fold               | 0.59    | 0.03     | 6.69     | 2.29     | 0.78     |
| <b>SMa1182</b>        | 647969  | 649888  | +              | 647969    | 649888   | NosZ nitrous oxide reductase                                  | 12.18   | 0.11     | 115      | 7.33     | 5.07     |
| <b>SMa1183</b>        | 649888  | 651249  | +              | 649888    | 651249   | NosD nitrous oxidase accessory protein                        | 6.83    | 0.1      | 17.28    | 1.33     | 0.85     |
| <b>SMa1184</b>        | 651246  | 652160  | +              | 651246    | 652160   | NosF ATPase                                                   | 2.96    | 0.11     | 38.8     | 2.67     | 1.62     |
| <b>SMa1186</b>        | 652981  | 653538  | +              | 652981    | 653538   | NosL copper chaperone                                         | 6.32    | 0.24     | 5.91     | 0.57     | 0.96     |
| <b>SMa1188</b>        | 653531  | 654555  | +              | 653531    | 654535   | NosX accessory protein                                        | 4.67    | 0.26     | 8.8      | 1.33     | 2.03     |
| <b>SMa1232</b>        | 676000  | 676721  | -              | 676020    | 676721   | NapC membrane-bound tetraheme cytochrome c subunit            | 0.42    | 2.67     | 11.8     | 3.33     | 1.42     |
| <b>SMa1233</b>        | 676725  | 677228  | -              | 676725    | 677228   | NapB periplasmic nitrate reductase cytochrome c- type subunit | 1.66    | 6.07     | 3.48     | 1.6      | 0.61     |
| <b>SMa1236</b>        | 677198  | 679702  | -              | 677198    | 679702   | NapA periplasmic nitrate reductase                            | 1.99    | 12.53    | 6.93     | 1.41     | 1.29     |
| <b>SMa1239</b>        | 679677  | 679964  | -              | 679677    | 679964   | NapD component of periplasmic nitrate reductase               | 7.41    | 2.92     | 5        | 1.33     | 1.22     |
| <b>SMa1243</b>        | 680890  | 681394  | -              | 680910    | 681353   | Azu1 pseudoazurin                                             | 23.42   | 0.22     | 46.35    | 3.75     | 2.51     |
| <b>SMa1269</b>        | 693888  | 695803  | -              | 693908    | 695803   | NorD accessory protein for nitric oxide reductase             | 5.3     | 0.87     | 2.1      | 0.75     | 1.14     |
| <b>SMa1272</b>        | 695808  | 696626  | -              | 695808    | 696626   | NorQ accessory protein for nitric oxide reductase             | 5.88    | 0.47     | 0.6      | 1.43     | 0.43     |
| <b>SMa1283</b>        | 700220  | 700926  | +              | 700220    | 700906   | NnrU-like protein                                             | 2.77    | 0.08     | 5.55     | 0.5      | 0.53     |
| <b>SMa1296</b>        | 706835  | 707950  | -              | 706855    | 707877   | Alcohol dehydrogenase, Zn-dependent class III                 | 2.83    | 0.04     | 12.12    | 1.2      | 0.85     |
| <b>SMa1353</b>        | 740057  | 741046  | -              | 740057    | 740944   | Isomerase                                                     | 2.65    | 17.48    | 1.9      | 1.22     | 1.52     |
| <b>SMa1450</b>        | 799175  | 800385  | -              | 799195    | 800385   | Thiolase                                                      | 1.73    | 0.31     | 5.55     | 0.2      | 0.68     |
| <b>SMa1495</b>        | 824518  | 825724  | +              | 824592    | 825704   | Aminotransferase                                              | 4.03    | 9.45     | 7.26     | 0.6      | 0.91     |
| <b>SMa1593</b>        | 887977  | 889161  | -              | 887977    | 889107   | oxidoreductase, fragment                                      | 0.45    | 1.64     | 0.26     | 0.57     | 9.3      |
| <b>SMa1670</b>        | 936579  | 937858  | +              | 936579    | 937838   | ArcA2 arginine deiminase                                      | 0.33    | 7.16     | 0.39     | 0.71     | 0.17     |
| <b>SMa1727</b>        | 974581  | 975536  | +              | 974626    | 975516   | alpha/beta hydrolase fold protein                             | 5.08    | 0.71     | 6.75     | 4.17     | 3.2      |
| <b>SMa1857</b>        | 1053951 | 1054885 | +              | 1054005   | 1054865  | hydrolase                                                     | 1.87    | 105.36   | 2.23     | 4        | 5.83     |
| <b>SMa1939</b>        | 1101611 | 1103220 | -              | 1101631   | 1103166  | oxidoreductase                                                | 1.46    | 7.83     | 2.29     | 2.37     | 2.95     |
| <b>SMa2033</b>        | 1149810 | 1150732 | +              | 1149915   | 1150712  | Transglycosylase                                              | 0.41    | 0.93     | 0.54     | 1.26     | 6.7      |



Table S3.- Cont.

| CoIP-RNA <sup>2</sup> |         |         |                |           |          | Enrichment in CoIP-RNA                                               |         |          |          |          |          |
|-----------------------|---------|---------|----------------|-----------|----------|----------------------------------------------------------------------|---------|----------|----------|----------|----------|
| Gene ID <sup>1</sup>  | Start   | Stop    | S <sup>3</sup> | ORF start | ORF stop | Gene product                                                         | Hfq-log | Hfq-stat | Hfq-cold | Hfq-heat | Hfq-salt |
| <b>SMa2141</b>        | 1210145 | 1211025 | -              | 1210165   | 1211025  | formyltetrahydrofolate deformylase                                   | 1.51    | 1.72     | 1.65     | 6        | 5.02     |
| <b>SMa2217</b>        | 1241610 | 1242935 | +              | 1241610   | 1242935  | decarboxylase                                                        | 2.44    | 1.11     | 0.22     | 7.31     | 0.61     |
| <b>SMa2219</b>        | 1242938 | 1243531 | +              | 1242938   | 1243531  | decarboxylase                                                        | 1.08    | 0.52     | 0.9      | 5.14     | 0.74     |
| <b>SMa2349</b>        | 1323007 | 1323708 | +              | 1323061   | 1323708  | oxidoreductase                                                       | 0.49    | 8.34     | 0.26     | 2.29     | 1.65     |
| <b>SMa2351</b>        | 1323705 | 1324655 | +              | 1323705   | 1324655  | oxidoreductase                                                       | 1.04    | 42.52    | 0.23     | 0.46     | 1.12     |
| <b>SMa2353</b>        | 1324660 | 1326878 | +              | 1324660   | 1326858  | oxidoreductase                                                       | 0.76    | 12.6     | 0.4      | 0.57     | 1.36     |
| <b>SMa2400</b>        | 1306158 | 1307591 | +              | 1306236   | 1307591  | RhbA rhizobactin biosynthesis protein                                | 0.52    | 1.18     | 0.05     | 0.31     | 6.67     |
| <b>SMa2402</b>        | 1307588 | 1309075 | +              | 1307588   | 1309075  | RhsB L-2,4-diaminobutyrate decarboxylase                             | 0.65    | 1.77     | 0.07     | 0.17     | 5.2      |
| <b>SMa2404</b>        | 1309062 | 1310819 | +              | 1309062   | 1310819  | RhbC rhizobactin biosynthesis protein                                | 0.89    | 0.84     | 0.09     | 0.36     | 7.59     |
| <b>SMa2406</b>        | 1310812 | 1311402 | +              | 1310812   | 1311402  | RhbD rhizobactin biosynthesis protein                                | 2.76    | 6.3      | 0.5      | 0.67     | 7.81     |
| <b>SMa2408</b>        | 1311399 | 1312769 | +              | 1311399   | 1312769  | RhbE rhizobactin biosynthesis protein                                | 0.74    | 0.67     | 0.29     | 0.38     | 5.91     |
| <b>SMb20019</b>       | 26186   | 27342   | -              | 26206     | 27342    | dihydropolypyllysine-residue succinyltransferase                     | 0.95    | 9.48     | 3.94     | 1.39     | 0.53     |
| <b>SMb20020</b>       | 27345   | 29444   | -              | 27345     | 29423    | pyruvate dehydrogenase (acetyl-transferring)                         | 1.31    | 39.59    | 1.23     | 1.45     | 0.15     |
| <b>SMb20059</b>       | 69552   | 70331   | +              | 69552     | 70331    | SAM-dependent methyltransferase                                      | 1.28    | 0.29     | 6.14     | 1.24     | 0.75     |
| <b>SMb20076</b>       | 83911   | 85001   | +              | 83965     | 84981    | 3-oxoacyl-[acyl-carrier-protein] reductase                           | 0.28    | 62.37    | 0.02     | 0.58     | 1.93     |
| <b>SMb20094*</b>      | 101390  | 103018  | -              | 101410    | 102993   | phospholipase D                                                      | 0.22    | 29.72    | 0.07     | 2.72     | 3.54     |
| <b>SMb20103</b>       | 113255  | 115096  | +              | 113274    | 115076   | probable FAD-dependent oxidoreductase                                | 0.79    | 5.31     | 6.32     | 0.27     | 0.61     |
| <b>SMb20115</b>       | 126376  | 128169  | -              | 126396    | 128117   | putative dihydroxy-acid dehydratase protein                          | 1.81    | 9.6      | 1.8      | 4.75     | 6.54     |
| <b>SMb20170</b>       | 188359  | 189533  | +              | 188406    | 189533   | probable glutathione-dependent formaldehyde dehydrogenase protein    | 6.53    | 4.49     | 6.94     | 1.14     | 0.52     |
| <b>SMb20171</b>       | 189530  | 190372  | +              | 189530    | 190372   | carboxylesterase                                                     | 7.04    | 1.73     | 4.96     | 0.16     | 0.08     |
| <b>SMb20172</b>       | 190386  | 190816  | +              | 190386    | 190796   | putative cytochrome c protein                                        | 4.04    | 5.3      | 13.75    | 0.67     | 0.71     |
| <b>SMb20173</b>       | 190920  | 192799  | +              | 190974    | 192779   | putative methanol dehydrogenase protein, large subunit               | 2.9     | 12.11    | 4.04     | 0.23     | 0.38     |
| <b>SMb20174</b>       | 192804  | 193388  | +              | 192858    | 193388   | putative cytochrome c protein                                        | 7.07    | 8.92     | 3.19     | 0.53     | 0.32     |
| <b>SMb20196</b>       | 204389  | 205324  | -              | 204389    | 205324   | probable CbbX protein                                                | 0.4     | 14.36    | 0.35     | 0.74     | 0.58     |
| <b>SMb20197</b>       | 205336  | 205725  | -              | 205336    | 205725   | putative ribulose-1,5-bisphosphate carboxylase small subunit protein | 0.3     | 12.49    | 3        | 2.67     | 2.43     |
| <b>SMb20198</b>       | 205747  | 207227  | -              | 205767    | 207227   | putative ribulose-1,5-bisphosphate carboxylase large subunit protein | 0.78    | 30.42    | 1        | 1        | 1.22     |
| <b>SMb20199</b>       | 207240  | 208339  | -              | 207260    | 208339   | putative fructose-1,6-bisphosphate aldolase protein                  | 0.83    | 24.25    | 1.5      | 1.5      | 0.46     |
| <b>SMb20200</b>       | 208342  | 210426  | -              | 208342    | 210426   | putative transketolase protein                                       | 0.57    | 21.26    | 1.3      | 1        | 0.41     |
| <b>SMb20202</b>       | 211317  | 212420  | -              | 211317    | 212366   | putative D-fructose-1,6-bisphosphatase protein                       | 0.34    | 6.7      | 4.3      | 1        | 1.32     |
| <b>SMb20204</b>       | 213638  | 213807  | +              | 213692    | 213787   | putative pyrroloquinoline quinone synthesis protein A                | 3.33    | 6.73     | 2.8      | 0.57     | 1.04     |
| <b>SMb20207</b>       | 215504  | 215800  | +              | 215504    | 215800   | putative pyrroloquinoline quinone synthesis protein D                | 2.76    | 26.77    | 6.45     | 1.5      | 1.37     |
| <b>SMb20216</b>       | 224060  | 225180  | +              | 224114    | 225160   | epoxide hydrolase                                                    | 1.01    | 6.45     | 1.5      | 1.5      | 1.22     |
| <b>SMb20238</b>       | 242383  | 243197  | -              | 242403    | 243197   | 3-demethylubiquinone-9 3-O-methyltransferase                         | 0.44    | 30.04    | 0.2      | 1.24     | 0.87     |

Table S3.- Cont.

| CoIP-RNA <sup>2</sup> |         |         |                |           |          | Enrichment in CoIP-RNA                                        |         |          |          |          |          |
|-----------------------|---------|---------|----------------|-----------|----------|---------------------------------------------------------------|---------|----------|----------|----------|----------|
| Gene ID <sup>1</sup>  | Start   | Stop    | S <sup>3</sup> | ORF start | ORF stop | Gene product                                                  | Hfq-log | Hfq-stat | Hfq-cold | Hfq-heat | Hfq-salt |
| <b>SMb20239</b>       | 243200  | 244240  | -              | 243200    | 244240   | putative dTDP-glucose 4,6-dehydratase protein                 | 0.49    | 33.91    | 0.28     | 2.92     | 4.21     |
| <b>SMb20243</b>       | 247592  | 248743  | -              | 247592    | 248743   | putative glycosyltransferase protein                          | 0.27    | 11.3     | 0.04     | 1.09     | 2.25     |
| <b>SMb20245*</b>      | 249858  | 251095  | -              | 249858    | 250964   | UDP-glucose 4-epimerase                                       | 1.95    | 35.02    | 0.13     | 3.25     | 12.57    |
| <b>SMb20246</b>       | 251182  | 252290  | +              | 251298    | 252290   | putative oxidoreductase                                       | 0.24    | 32.35    | 0.06     | 1.08     | 0.62     |
| <b>SMb20247</b>       | 252295  | 253328  | +              | 252295    | 253308   | probable oxidoreductase                                       | 0.26    | 22.05    | 0.25     | 1.26     | 1.92     |
| <b>SMb20249*</b>      | 255207  | 256341  | +              | 255238    | 256341   | putative myo-inositol-1-phosphate synthase                    | 0.26    | 17.72    | 0.11     | 1.27     | 6        |
| <b>SMb20270</b>       | 275427  | 276482  | +              | 275434    | 276462   | probable proline racemase                                     | 1.22    | 0.39     | 5.31     | 0.42     | 0.58     |
| <b>SMb20384</b>       | 395399  | 396390  | -              | 395419    | 396390   | membrane dipeptidase                                          | 49.97   | 6.14     | 25.45    | 20.08    | 26.86    |
| <b>SMb20404</b>       | 416859  | 419119  | +              | 416859    | 419099   | putative aldehyde dehydrogenase protein                       | 0.59    | 20.25    | 0.33     | 3.09     | 0.66     |
| <b>SMb20423</b>       | 437134  | 438566  | -              | 437134    | 438510   | adenosylmethionine-8-amino-7-oxononanoate transaminase        | 7.39    | 7.09     | 0.87     | 2.55     | 1.43     |
| <b>SMb20465</b>       | 477045  | 478189  | -              | 477065    | 478135   | probable glucokinase                                          | 1.15    | 5.51     | 0.19     | 1.47     | 6.47     |
| <b>SMb20482</b>       | 496696  | 498503  | +              | 496696    | 498483   | probable D-alanine-D-alanine-ligase                           | 1.12    | 6        | 0.33     | 0.22     | 3.06     |
| <b>SMb20489</b>       | 505347  | 506819  | +              | 505347    | 506819   | probable carbohydrate kinase                                  | 0.82    | 0.17     | 5.45     | 0.67     | 3.86     |
| <b>SMb20490</b>       | 506812  | 507530  | +              | 506812    | 507510   | L-fucose-phosphate aldolase                                   | 3.65    | 0.63     | 6.22     | 0.91     | 3.54     |
| <b>SMb20574</b>       | 1586795 | 1589466 | +              | 1586819   | 1589446  | (1->4)-alpha-D-glucan 1-alpha-D-glucosylmutase                | 0.29    | 7.17     | 0.14     | 5.1      | 5.96     |
| <b>SMb20575</b>       | 1589440 | 1590569 | -              | 1589460   | 1590515  | 3-carboxy-cis,cis-muconate cycloisomerase protein             | 0.2     | 1.57     | 0.37     | 1        | 5.78     |
| <b>SMb20584</b>       | 1598685 | 1599394 | +              | 1598712   | 1599374  | putative oxidoreductase                                       | 5       | 32.73    | 3.26     | 3.83     | 2.36     |
| <b>SMb20585</b>       | 1599530 | 1601349 | +              | 1599584   | 1601329  | putative gamma-glutamyltranspeptidase protein                 | 1.09    | 5.59     | 1.13     | 0.43     | 1.11     |
| <b>SMb20587</b>       | 1602284 | 1603198 | +              | 1602338   | 1603198  | Beta-ketoadipate succinyl-CoA transferase                     | 0.72    | 9.61     | 0.22     | 0.53     | 0.42     |
| <b>SMb20588</b>       | 1603212 | 1603997 | +              | 1603212   | 1603997  | Beta-ketoadipate succinyl-CoA transferase                     | 1.53    | 25.86    | 2.3      | 1.33     | 0.81     |
| <b>SMb20589</b>       | 1603997 | 1605219 | +              | 1603997   | 1605199  | acetyl-CoA C-acyltransferase                                  | 0.4     | 6.57     | 0.7      | 1        | 1.07     |
| <b>SMb20704*</b>      | 1505405 | 1506941 | +              | 1505461   | 1506921  | putative glycogen synthase protein                            | 0.96    | 25.44    | 0.03     | 1.8      | 1.63     |
| <b>SMb20745</b>       | 1533856 | 1534946 | -              | 1533876   | 1534910  | glutamate-ammonia ligase                                      | 2.98    | 0.23     | 12.87    | 0.89     | 31.11    |
| <b>SMb20755</b>       | 1545142 | 1546728 | +              | 1545196   | 1546728  | putative propionyl-CoA carboxylase beta chain protein         | 7.51    | 9.19     | 8.12     | 1.13     | 1.67     |
| <b>SMb20772</b>       | 1564594 | 1565686 | -              | 1564614   | 1565660  | probable pyridoxal phosphate biosynthetic protein PdxA        | 0.89    | 0.45     | 1.95     | 2        | 11.11    |
| <b>SMb20821</b>       | 609947  | 610821  | +              | 610001    | 610801   | putative 3-methyl-2-oxobutanoate hydroxymethyltransferase     | 0.92    | 52.9     | 1.19     | 3.16     | 89.23    |
| <b>SMb20825</b>       | 615982  | 616813  | +              | 616023    | 616793   | putative acetyltransferase, cysElacA/lpxA/nodL family protein | 2.73    | 1.15     | 9.93     | 1.56     | 2.1      |
| <b>SMb20932</b>       | 1156100 | 1157580 | -              | 1156120   | 1157517  | glucan endo-1,3-beta-D-glucosidase                            | 2.14    | 7.68     | 0.56     | 0.81     | 0.94     |
| <b>SMb20993</b>       | 1228662 | 1230045 | +              | 1228814   | 1230025  | acyl-CoA dehydrogenase                                        | 3.75    | 9.14     | 5.45     | 1.67     | 3.55     |
| <b>SMb21009</b>       | 1242295 | 1243914 | -              | 1242315   | 1243808  | probable glycerol kinase, similar to sugar kinases protein    | 1.06    | 0.52     | 5.1      | 3.67     | 10.75    |
| <b>SMb21094</b>       | 736482  | 737976  | +              | 736510    | 737976   | probable argininosuccinate lyase protein                      | 10.69   | 1.82     | 3.6      | 39.33    | 13.8     |
| <b>SMb21100</b>       | 742000  | 742898  | +              | 742000    | 742878   | probable polysaccharide deacetylase                           | 0.28    | 18.16    | 0.57     | 4.63     | 1.63     |
| <b>SMb21148</b>       | 892577  | 893774  | +              | 892614    | 893774   | probable oxidoreductase                                       | 4.92    | 1.83     | 2.85     | 19.15    | 2.42     |

Table S3.- Cont.

| CoIP-RNA <sup>2</sup> |         |         |                |           |          | Enrichment in CoIP-RNA                                                       |         |          |          |          |          |
|-----------------------|---------|---------|----------------|-----------|----------|------------------------------------------------------------------------------|---------|----------|----------|----------|----------|
| Gene ID <sup>1</sup>  | Start   | Stop    | S <sup>3</sup> | ORF start | ORF stop | Gene product                                                                 | Hfq-log | Hfq-stat | Hfq-cold | Hfq-heat | Hfq-salt |
| <b>Smb21186</b>       | 935333  | 936673  | -              | 935353    | 936621   | putative 4-aminobutyrate aminotransferase protein                            | 7.8     | 0.66     | 10.22    | 2.71     | 2.57     |
| <b>Smb21202</b>       | 953899  | 954905  | +              | 953953    | 954885   | probable dioxygenase                                                         | 1.24    | 52.92    | 0.09     | 0.71     | 0.22     |
| <b>Smb21203</b>       | 954932  | 955608  | +              | 954986    | 955588   | putative esterase lipase/thioesterase protein                                | 1.44    | 15.2     | 0.44     | 0.55     | 0.5      |
| <b>Smb21213</b>       | 966517  | 967196  | +              | 966517    | 967176   | putative serine/threonine protein phosphatase                                | 1.41    | 1.7      | 6.2      | 1.33     | 1.32     |
| <b>Smb21217</b>       | 779808  | 780743  | -              | 779808    | 780743   | Sugar amine kinase                                                           | 2.59    | 2.36     | 1.2      | 3.33     | 6.49     |
| <b>Smb21239</b>       | 804362  | 805620  | +              | 804362    | 805600   | putative pectate lyase                                                       | 10.93   | 3.22     | 17.69    | 3.26     | 2.41     |
| <b>Smb21246</b>       | 814934  | 815646  | +              | 814934    | 815626   | undecaprenyl-phosphate galactose phosphotransferase                          | 1.48    | 1.35     | 5.28     | 0.8      | 0.97     |
| <b>Smb21256</b>       | 826662  | 828169  | -              | 826682    | 828115   | probable UDP-glucose/GDP-mannose dehydrogenase                               | 0.91    | 0.16     | 6.95     | 0.38     | 0.56     |
| <b>Smb21302</b>       | 884993  | 885494  | +              | 885019    | 885474   | putative fucose operon fucU protein                                          | 1.29    | 0.86     | 7.8      | 2.4      | 2.86     |
| <b>Smb21304</b>       | 885931  | 886771  | +              | 885957    | 886751   | putative NG,NG-dimethylarginine dimethylaminohydrolase (dimethylargininase)  | 9.53    | 3.77     | 11.68    | 10.46    | 3.14     |
| <b>Smb21354</b>       | 1019475 | 1020928 | -              | 1019495   | 1020904  | putative glucuronate isomerase (uronic isomerase) protein                    | 1.18    | 3.91     | 2.68     | 2.92     | 20.6     |
| <b>Smb21364</b>       | 1027620 | 1029193 | -              | 1027640   | 1029193  | putative membrane-anchored oxidoreductase                                    | 0.15    | 7.09     | 1.11     | 1.71     | 1.65     |
| <b>Smb21368</b>       | 1031581 | 1032564 | +              | 1031581   | 1032564  | putative cytochrome c oxidase chain II protein                               | 0.78    | 4.13     | 0.45     | 1        | 7.46     |
| <b>Smb21373</b>       | 1037696 | 1038996 | -              | 1037716   | 1038996  | probable tagatose 6-phosphate kinase                                         | 0.28    | 0.63     | 0.21     | 0.43     | 6.65     |
| <b>Smb21374</b>       | 1038999 | 1039940 | -              | 1038999   | 1039940  | fructokinase                                                                 | 0.62    | 0.94     | 0.08     | 0.27     | 7.83     |
| <b>Smb21417</b>       | 1346712 | 1347782 | +              | 1346712   | 1347782  | putative CDP-glucose 4,6-dehydratase protein                                 | 0.61    | 0.21     | 7.48     | 0.46     | 0.84     |
| <b>Smb21418</b>       | 1347789 | 1349041 | +              | 1347789   | 1349021  | putative NDP-hexose 3-C-methyltransferase protein                            | 1.07    | 0.22     | 6.22     | 0.55     | 1.6      |
| <b>Smb21446*</b>      | 1374614 | 1376744 | -              | 1374614   | 1376710  | isoamylase                                                                   | 0.24    | 5.01     | 0.23     | 1.45     | 3.54     |
| <b>Smb21447*</b>      | 1376831 | 1378678 | +              | 1376853   | 1378658  | 4-alpha-D-((1->4)-alpha-D- glucano)trehalosetrehal ohydrolase                | 0.26    | 14.37    | 0.14     | 3.05     | 4.52     |
| <b>Smb21449*</b>      | 1379371 | 1380231 | -              | 1379391   | 1380113  | probable glutathione S-transferase protein                                   | 0.85    | 12.46    | 0.69     | 2        | 14.43    |
| <b>Smb21474</b>       | 1399297 | 1400099 | +              | 1399297   | 1400079  | putative dehydrogenase, possibly 3-oxoacyl-[acyl- carrier protein] reductase | 0.57    | 14.5     | 0.07     | 0.85     | 4.38     |
| <b>Smb21487</b>       | 1408262 | 1409471 | +              | 1408363   | 1409451  | putative cytochrome o ubiquinol oxidase chain II protein                     | 1.94    | 0.05     | 11.64    | 0.11     | 0.27     |
| <b>Smb21488</b>       | 1409489 | 1411498 | +              | 1409489   | 1411498  | putative cytochrome o ubiquinol oxidase chain I protein                      | 1.91    | 0.04     | 5.27     | 0.06     | 0.17     |
| <b>Smb21489</b>       | 1411495 | 1412127 | +              | 1411495   | 1412127  | putative cytochrome o ubiquinol oxidase chain III protein                    | 2.56    | 0.07     | 8.01     | 0.32     | 0.38     |
| <b>Smb21504</b>       | 1429228 | 1429983 | -              | 1429228   | 1429983  | putative protein, slightly similar to carbohydrate deacetylase               | 1.5     | 0.9      | 6        | 0.67     | 0.71     |
| <b>Smb21543</b>       | 1074851 | 1078315 | +              | 1074957   | 1078295  | putative hemolysin-adenylate cyclase protein                                 | 1.86    | 47.12    | 0.66     | 1.69     | 1.9      |
| <b>Smb21581</b>       | 1120648 | 1121814 | +              | 1120703   | 1121794  | putative glycosyltransferase, similar to smb20117 protein                    | 0.74    | 21.26    | 0.07     | 2.78     | 2.12     |
| <b>Smb21634</b>       | 1662466 | 1662989 | -              | 1662486   | 1662989  | ADP-dependent short-chain-acyl-CoA hydrolase                                 | 0.76    | 7.03     | 3.2      | 2.33     | 1.72     |
| <b>Smb21635</b>       | 1662986 | 1665052 | -              | 1662986   | 1665052  | aldehyde dehydrogenase (NAD+)                                                | 0.37    | 18.51    | 0.96     | 0.4      | 0.67     |
| <b>Smb21636</b>       | 1665083 | 1666179 | -              | 1665103   | 1666179  | probable phenylacetic acid degradation oxidoreductase                        | 0.57    | 12.97    | 1.6      | 1.67     | 0.91     |
| <b>Smb21637</b>       | 1666188 | 1666732 | -              | 1666208   | 1666732  | putative phenylacetic acid degradation protein                               | 0.27    | 6.91     | 2.1      | 2        | 0.61     |
| <b>Smb21639</b>       | 1667527 | 1667811 | -              | 1667527   | 1667811  | putative phenylacetic acid degradation protein                               | 1.33    | 31.55    | 4.2      | 0.86     | 0.7      |
| <b>Smb21640</b>       | 1667831 | 1668892 | -              | 1667831   | 1668829  | putative phenylacetic acid degradation protein                               | 0.66    | 8.64     | 1.8      | 1.28     | 0.74     |

Table S3.- Cont.

| CoIP-RNA <sup>2</sup> |         |         |                |           |          | Enrichment in CoIP-RNA                                                    |         |          |          |          |          |
|-----------------------|---------|---------|----------------|-----------|----------|---------------------------------------------------------------------------|---------|----------|----------|----------|----------|
| Gene ID <sup>1</sup>  | Start   | Stop    | S <sup>3</sup> | ORF start | ORF stop | Gene product                                                              | Hfq-log | Hfq-stat | Hfq-cold | Hfq-heat | Hfq-salt |
| <b>SMb21648</b>       | 1678706 | 1680341 | -              | 1678726   | 1680198  | MeIA                                                                      | 1.13    | 0.67     | 9.87     | 0.67     | 0.68     |
| <b>SMc00036</b>       | 1050740 | 1051434 | +              | 1050794   | 1051414  | Putative glutathione S-transferase                                        | 1.83    | 0.83     | 5.34     | 0.8      | 1.1      |
| <b>SMc00045</b>       | 1069331 | 1069854 | +              | 1069385   | 1069834  | Probable Cytochrome c556                                                  | 5.04    | 5.88     | 7.01     | 0.95     | 0.99     |
| <b>SMc00086</b>       | 1069902 | 1070890 | +              | 1069956   | 1070870  | Putative diheme cytochrome C-type signal peptide protein                  | 3.84    | 1.05     | 5.87     | 0.52     | 0.93     |
| <b>SMc00093</b>       | 1039273 | 1040942 | -              | 1039293   | 1040942  | Choline dehydrogenase CHD oxidoreductase flavoprotein FAD membrane        | 4.45    | 0.29     | 1.6      | 5.22     | 0.51     |
| <b>SMc00103</b>       | 1062702 | 1063487 | -              | 1062702   | 1063364  | Putative (S)-2-haloacid dehalogenase IVA                                  | 13.1    | 1.47     | 3.16     | 7.32     | 7.5      |
| <b>SMc00117</b>       | 1084354 | 1084802 | -              | 1084374   | 1084781  | Probable peptide methionine sulfoxide reductase                           | 6.13    | 3.49     | 0.22     | 1.77     | 0.45     |
| <b>SMc00149</b>       | 2020170 | 2021696 | +              | 2020255   | 2021676  | Probable fumarate hydratase class II                                      | 8.86    | 3.3      | 3.08     | 1.01     | 0.66     |
| <b>SMc00165</b>       | 1999787 | 2000682 | -              | 1999807   | 2000628  | Probable oxidoreductase                                                   | 2.32    | 9.45     | 1.46     | 0.86     | 0.78     |
| <b>SMc00180</b>       | 1983591 | 1984575 | +              | 1983644   | 1984555  | Probable coproporphyrinogen III oxidase, aerobic protein                  | 1.92    | 0.27     | 6.45     | 0.2      | 0.49     |
| <b>SMc00225</b>       | 1061895 | 1062688 | -              | 1061915   | 1062688  | Probable trans-aconitate methyltransferase                                | 2.07    | 0.3      | 1.45     | 7.36     | 1.05     |
| <b>SMc00246</b>       | 1813817 | 1814838 | -              | 1813837   | 1814814  | Probable quinone oxidoreductase                                           | 19.61   | 6.85     | 11.54    | 10.99    | 7.78     |
| <b>SMc00321</b>       | 273485  | 274440  | +              | 273485    | 274420   | Probable tRNA pseudouridine synthase B                                    | 1.25    | 0.22     | 6        | 0.35     | 1.61     |
| <b>SMc00365</b>       | 319240  | 320396  | +              | 319294    | 320376   | Probable phenylalanyl-tRNA synthetase alpha chain                         | 10.85   | 0.42     | 4.51     | 0.23     | 1.05     |
| <b>SMc00374</b>       | 328131  | 329155  | -              | 328151    | 329101   | Putative oxidoreductase transmembrane protein                             | 0.95    | 5.13     | 0.37     | 0.62     | 8.67     |
| <b>SMc00414</b>       | 363378  | 364047  | -              | 363378    | 363980   | Phospholipid N-methyltransferase                                          | 1.54    | 10.21    | 0.54     | 1.64     | 2.82     |
| <b>SMc00463</b>       | 1961433 | 1961804 | -              | 1961433   | 1961804  | Probable dihydroneopterin aldolase dhna lyase folate biosynthesis protein | 6.9     | 2.06     | 9.02     | 2.37     | 1.01     |
| <b>SMc00465</b>       | 1960902 | 1961446 | -              | 1960922   | 1961446  | Probable 7,8-dihydro-6-hydroxymethylpterin-pyrophosphate kinase protein   | 6.1     | 0.67     | 5.77     | 0.31     | 0.61     |
| <b>SMc00480</b>       | 1937035 | 1938323 | +              | 1937089   | 1938303  | Probable isocitrate dehydrogenase [NADP] protein                          | 51.08   | 4.31     | 13.1     | 7.58     | 9.64     |
| <b>SMc00495</b>       | 1915686 | 1916569 | +              | 1915805   | 1916569  | Probable phosphoribosylaminoimidazole- succinocarboxamide synthase        | 5.37    | 5.1      | 4.75     | 0.64     | 1.02     |
| <b>SMc00553</b>       | 1222891 | 1223651 | -              | 1222911   | 1223651  | Probable NAD/NADP dependent oxidoreductase                                | 2.76    | 5.09     | 2.38     | 1.03     | 2.12     |
| <b>SMc00605</b>       | 1276321 | 1276949 | -              | 1276341   | 1276949  | Glutathione S-transferase family protein                                  | 5.39    | 2.02     | 2.05     | 0.35     | 0.66     |
| <b>SMc00615</b>       | 1286874 | 1287972 | -              | 1286874   | 1287944  | 5'-phosphoribosyl-5-aminoimidazole synthetase                             | 0.66    | 0.35     | 5.08     | 0.71     | 1.04     |
| <b>SMc00637</b>       | 2940486 | 2942011 | -              | 2940506   | 2941936  | Phosphoglucosamine mutase                                                 | 19.45   | 13.67    | 14.19    | 8.97     | 15.47    |
| <b>SMc00640</b>       | 2936883 | 2938127 | -              | 2936903   | 2938081  | Putative phosphoserine aminotransferase                                   | 1.43    | 5.56     | 0.9      | 0.55     | 0.69     |
| <b>SMc00673</b>       | 2906392 | 2907822 | +              | 2906417   | 2907802  | Hydrolase                                                                 | 1.46    | 1.35     | 7.74     | 5.21     | 1.66     |
| <b>SMc00768</b>       | 779960  | 781338  | -              | 779980    | 781269   | Probable isocitrate lyase                                                 | 0.81    | 231.51   | 0.65     | 0.55     | 1.05     |
| <b>SMc00779</b>       | 799009  | 800267  | +              | 799009    | 800247   | Probable FAD-linked oxidoreductase                                        | 2.36    | 6.04     | 2.8      | 0.76     | 1.65     |
| <b>SMc00781</b>       | 801290  | 802832  | +              | 801316    | 802812   | Methylmalonate-semialdehyde dehydrogenase                                 | 2.36    | 5.1      | 1.27     | 0.99     | 0.82     |
| <b>SMc00815</b>       | 836121  | 837734  | +              | 836212    | 837714   | Probable inosine-5'-monophosphate dehydrogenase                           | 0.83    | 0.05     | 6.12     | 0.35     | 7.74     |
| <b>SMc00817</b>       | 838252  | 839201  | +              | 838306    | 839181   | Probable carboxymethylenebutenolidase                                     | 1.09    | 9.9      | 6.48     | 0.8      | 2.31     |
| <b>SMc00860</b>       | 927485  | 928545  | -              | 927505    | 928521   | Putative octaprenyl-diphosphate synthase                                  | 12.62   | 1.43     | 12.41    | 2.88     | 5.98     |
| <b>SMc00867</b>       | 919560  | 920342  | -              | 919580    | 920230   | Probable ribonuclease HII protein                                         | 0.7     | 2.19     | 0.85     | 1.75     | 5.75     |

Table S3.- Cont.

| CoIP-RNA <sup>2</sup> |         |         |                |           |          | Enrichment in CoIP-RNA                                                    |         |          |          |          |          |
|-----------------------|---------|---------|----------------|-----------|----------|---------------------------------------------------------------------------|---------|----------|----------|----------|----------|
| Gene ID <sup>1</sup>  | Start   | Stop    | S <sup>3</sup> | ORF start | ORF stop | Gene product                                                              | Hfq-log | Hfq-stat | Hfq-cold | Hfq-heat | Hfq-salt |
| SMc00880              | 906261  | 907094  | -              | 906261    | 907031   | Probable 3-oxoacyl-(acyl carrier protein) reductase                       | 3.11    | 9.76     | 1.72     | 11.86    | 3.28     |
| SMc00883              | 903790  | 904694  | -              | 903810    | 904694   | Probable regucalcin                                                       | 5.01    | 3.26     | 1.7      | 2.98     | 0.78     |
| SMc00893              | 889665  | 890395  | +              | 889665    | 890375   | Probable phosphoglycolate phosphatase                                     | 1.63    | 0.36     | 6.3      | 2        | 4.26     |
| SMc00894              | 888315  | 889648  | +              | 888315    | 889628   | Putative 3-deoxy-D-manno-octulosonic-acid transferase                     | 1.26    | 0.09     | 5.31     | 1.59     | 3.04     |
| SMc00896              | 887162  | 888000  | +              | 887162    | 887980   | Inositol monophosphatase family protein                                   | 5.33    | 1.05     | 1.84     | 2.25     | 3.1      |
| SMc00923              | 859650  | 860329  | +              | 859674    | 860309   | Probable DNA-3-methyladenine glycosylase I                                | 3       | 0.87     | 6.57     | 1.37     | 4.65     |
| SMc00943              | 1770218 | 1770880 | -              | 1770238   | 1770837  | WrbA1 flavoprotein                                                        | 7.02    | 12.39    | 1.87     | 1.56     | 7.35     |
| SMc00948              | 1774729 | 1776189 | +              | 1774760   | 1776169  | Glutamine synthetase I                                                    | 3.36    | 1.59     | 2.49     | 0.79     | 5.94     |
| SMc00956              | 1786128 | 1786922 | +              | 1786128   | 1786922  | Probable exodeoxyribonuclease III                                         | 1.95    | 10.84    | 2.53     | 2.89     | 7.85     |
| SMc00982              | 954956  | 956321  | +              | 955077    | 956321   | Putative dioxygenase Rieske 2Fe-2S family protein                         | 11.26   | 0.14     | 3.09     | 0.77     | 0.42     |
| SMc01030              | 1555923 | 1556993 | +              | 1555947   | 1556993  | Pyruvate dehydrogenase E1 component alpha subunit                         | 6.49    | 0.43     | 4.53     | 2.76     | 1.61     |
| SMc01035              | 1561049 | 1562514 | +              | 1561049   | 1562494  | Probable dihydrolipoamide dehydrogenase                                   | 4.02    | 0.23     | 5.29     | 2.75     | 2.23     |
| SMc01047              | 1576163 | 1577046 | +              | 1576163   | 1577026  | D-alanine aminotransferase                                                | 10.17   | 0.39     | 7.18     | 1.05     | 1.86     |
| SMc01093              | 465657  | 466543  | -              | 465677    | 466492   | Putative esterase/lipase                                                  | 3.55    | 6.07     | 1.78     | 6.41     | 1.34     |
| SMc01126              | 424347  | 426717  | -              | 424367    | 426652   | NADP-dependent malic enzyme protein                                       | 4.54    | 0.7      | 6.96     | 2.27     | 2.44     |
| SMc01134              | 416442  | 416805  | +              | 416474    | 416785   | Probable integration host factor beta-subunit                             | 3.61    | 5.69     | 5.86     | 12.36    | 36.9     |
| SMc01135              | 415364  | 416390  | +              | 415411    | 416370   | Putative protease IV transmembrane protein                                | 2.1     | 1.67     | 2.11     | 15.2     | 9.53     |
| SMc01165              | 383832  | 385858  | -              | 383852    | 385804   | Putative sugar kinase                                                     | 0.63    | 6.15     | 0.65     | 1.27     | 3.26     |
| SMc01169              | 1759723 | 1760907 | -              | 1759743   | 1760861  | Probable alanine dehydrogenase oxidoreductase                             | 6.47    | 1.59     | 0.33     | 4.1      | 0.86     |
| SMc01172              | 1757646 | 1758563 | +              | 1757700   | 1758563  | Putative 3-mercaptopyruvate sulfurtransferase                             | 7.13    | 2.16     | 7.46     | 2        | 2.24     |
| SMc01173              | 1756753 | 1757522 | +              | 1756753   | 1757502  | Probable alanyl-tRNA synthetase                                           | 6.15    | 2.05     | 2.71     | 1.3      | 0.93     |
| SMc01202              | 1727315 | 1728028 | -              | 1727335   | 1727952  | Putative lipoprotein                                                      | 1.63    | 0.84     | 1.3      | 1.52     | 5.8      |
| SMc01208              | 1720404 | 1720938 | +              | 1720429   | 1720938  | Putative peptidyl-prolyl cis-trans isomerase B                            | 23.24   | 6.3      | 4.5      | 0.75     | 1.55     |
| SMc01227              | 1697011 | 1698152 | -              | 1697031   | 1698152  | Putative glycerol trinitrate (GTN) reductase                              | 3.67    | 3.3      | 0.16     | 6.19     | 0.66     |
| SMc01336              | 1441614 | 1444499 | -              | 1441634   | 1444408  | Probable ribonuclease E                                                   | 13.85   | 0.38     | 10.84    | 1.81     | 2.98     |
| SMc01343              | 1436883 | 1437373 | -              | 1436903   | 1437349  | Putative 3-dehydroquinate dehydratase                                     | 28.1    | 2.41     | 28.3     | 2.22     | 15.14    |
| SMc01344              | 1436403 | 1436879 | -              | 1436403   | 1436879  | Probable biotin carboxyl carrier protein of acetyl-CoA carboxylase (bccp) | 59.93   | 2.53     | 24.35    | 1.96     | 6.35     |
| SMc01345              | 1435047 | 1436396 | -              | 1435047   | 1436396  | Probable biotin carboxylase                                               | 9.44    | 0.21     | 4.08     | 0.43     | 1.17     |
| SMc01423              | 2268825 | 2269484 | -              | 2268825   | 2269484  | Probable nitrile hydratase subunit beta protein                           | 0.66    | 1.02     | 5.7      | 6        | 2.28     |
| SMc01471              | 2318423 | 2319115 | +              | 2318496   | 2319095  | Probable electron transport protein SCO1/SenC, cytochrome C oxidase       | 7.01    | 374.01   | 15.89    | 10.69    | 29.27    |
| SMc01500              | 2629356 | 2630149 | -              | 2629376   | 2630149  | Probable sorbitol dehydrogenase (L-iditol 2- dehydrogenase)               | 0.91    | 0.25     | 4.03     | 0.57     | 14       |
| SMc01501              | 2627865 | 2629349 | -              | 2627865   | 2629349  | Probable mannitol 2-dehydrogenase                                         | 0.53    | 0.18     | 2.22     | 0.59     | 7.91     |
| SMc01502              | 2627174 | 2627868 | -              | 2627194   | 2627868  | Hydrolase phosphatase                                                     | 1.64    | 1.21     | 3.29     | 0.52     | 9.09     |

Table S3.- Cont.

| CoIP-RNA <sup>2</sup> |         |         |                |           |          | Enrichment in CoIP-RNA                                                         |         |          |          |          |          |
|-----------------------|---------|---------|----------------|-----------|----------|--------------------------------------------------------------------------------|---------|----------|----------|----------|----------|
| Gene ID <sup>1</sup>  | Start   | Stop    | S <sup>3</sup> | ORF start | ORF stop | Gene product                                                                   | Hfq-log | Hfq-stat | Hfq-cold | Hfq-heat | Hfq-salt |
| SMc01524              | 2609099 | 2610246 | -              | 2609119   | 2610219  | Putative dipeptidase                                                           | 6.96    | 1.4      | 7.97     | 4.21     | 10.4     |
| SMc01582              | 2386279 | 2387444 | -              | 2386299   | 2387444  | Putative alcohol dehydrogenase                                                 | 2.57    | 1.75     | 5.58     | 2.77     | 0.7      |
| SMc01616              | 2406458 | 2407416 | -              | 2406478   | 2407416  | Putative D-erythrulose-1-phosphate dehydrogenase                               | 0.46    | 0.2      | 9        | 1.2      | 1.34     |
| SMc01619              | 2409552 | 2410607 | -              | 2409552   | 2410607  | Oxidoreductase                                                                 | 0.36    | 0.14     | 11.4     | 1.5      | 1.07     |
| SMc01620              | 2410621 | 2412135 | -              | 2410621   | 2412135  | Putative erythritol phosphate dehydrogenase                                    | 0.5     | 0.28     | 6.38     | 0.55     | 1.33     |
| SMc01621              | 2412144 | 2412832 | -              | 2412164   | 2412832  | Putative L-fucose phosphate aldolase                                           | 0.2     | 0.1      | 11.4     | 1.6      | 1.22     |
| SMc01622              | 2412842 | 2413879 | -              | 2412842   | 2413879  | Oxidoreductase                                                                 | 0.28    | 0.08     | 6.5      | 1        | 1.52     |
| SMc01658              | 2457282 | 2458013 | +              | 2457282   | 2458013  | Putative ferric iron reductase                                                 | 0.25    | 0.57     | 2        | 2        | 38.96    |
| SMc01661              | 2459969 | 2461580 | -              | 2459989   | 2461536  | Probable trimethylamine methyltransferase                                      | 5.94    | 10.24    | 11.01    | 3.14     | 1.96     |
| SMc01662              | 2461597 | 2464064 | -              | 2461617   | 2464064  | Probable sarcosine dehydrogenase                                               | 2.23    | 1.9      | 6.94     | 2.5      | 0.27     |
| SMc01666              | 2469586 | 2470924 | +              | 2469621   | 2470904  | Putative methionine gamma-lyase                                                | 2.27    | 13.61    | 1.33     | 2.21     | 2.24     |
| SMc01720              | 482266  | 482652  | -              | 482266    | 482652   | Probable ribonuclease P protein component (protein C5)                         | 34.12   | 0.67     | 12.98    | 1.39     | 3.69     |
| SMc01790              | 1335415 | 1336679 | -              | 1335435   | 1336679  | Putative glycosyltransferase                                                   | 1.7     | 0.49     | 5.4      | 1        | 0.61     |
| SMc01814              | 2635706 | 2637114 | +              | 2635733   | 2637094  | Probable glutamate synthase small chain                                        | 10.34   | 24.28    | 17.77    | 12.29    | 53.64    |
| SMc01820              | 2643533 | 2644940 | +              | 2643670   | 2644920  | Putative N-carbamyl-L-amino acid amidohydrolase                                | 8.52    | 6.31     | 4.93     | 18.02    | 15.19    |
| SMc01905              | 1364597 | 1367191 | +              | 1364751   | 1367171  | Probable ATP-dependent protease LA protein                                     | 3.69    | 5.1      | 0.4      | 1.82     | 0.64     |
| SMc01918              | 1382176 | 1383480 | +              | 1382176   | 1383480  | NADH-quinone oxidoreductase subunit F 1                                        | 5.97    | 0.29     | 6.24     | 2.03     | 1.01     |
| SMc01967              | 2689268 | 2690461 | -              | 2689288   | 2690346  | Putative agmatinase                                                            | 3.57    | 1.02     | 4.94     | 13.4     | 4.25     |
| SMc01972              | 2695775 | 2697108 | -              | 2695795   | 2697108  | Putative gamma-glutamylputrescine oxidoreductase                               | 1.02    | 0.42     | 0.89     | 0.7      | 6.36     |
| SMc01982              | 2706278 | 2707370 | +              | 2706406   | 2707350  | Probable alternative cytochrome C oxidase polypeptide II transmembrane protein | 0.64    | 15.93    | 0.8      | 3.11     | 3.01     |
| SMc01983              | 2707384 | 2709165 | +              | 2707384   | 2709165  | Probable alternative cytochrome C oxidase polypeptide I transmembrane protein  | 0.42    | 8.43     | 0.16     | 0.8      | 1.46     |
| SMc01985              | 2709873 | 2710595 | +              | 2709873   | 2710595  | Cytochrome c oxidase subunit III                                               | 0.16    | 6.47     | 0.6      | 1        | 2.13     |
| SMc02026              | 2730261 | 2731117 | -              | 2730281   | 2731117  | Putative beta-lactamase precursor protein                                      | 2.3     | 1.31     | 8        | 4.67     | 8.32     |
| SMc02034              | 2740350 | 2741197 | -              | 2740370   | 2741143  | Putative oxidoreductase                                                        | 2.26    | 37.63    | 0.93     | 0.9      | 0.91     |
| SMc02035              | 2741351 | 2742465 | -              | 2741371   | 2742411  | Malate/L-lactate dehydrogenase family protein                                  | 1       | 14.94    | 0.08     | 0.67     | 0.12     |
| SMc02047              | 1673622 | 1674841 | -              | 1673622   | 1674761  | Probable aminomethyltransferase (glycine cleavage system T protein)            | 1.36    | 7.38     | 1.26     | 5.74     | 0.59     |
| SMc02048              | 1673243 | 1673605 | -              | 1673243   | 1673605  | Probable glycine cleavage system H                                             | 2.63    | 8.3      | 0.58     | 3.14     | 0.36     |
| SMc02049              | 1670359 | 1673243 | -              | 1670379   | 1673243  | Probable glycine dehydrogenase decarboxylating protein                         | 2.19    | 7.09     | 1.27     | 3.65     | 0.26     |
| SMc02062              | 1655208 | 1655881 | +              | 1655208   | 1655861  | L-isoaspartyl protein carboxyl O- methyltransferase (PCMT)                     | 0.86    | 0.72     | 6.52     | 0.33     | 0.61     |
| SMc02089              | 1619930 | 1621119 | +              | 1619930   | 1621099  | Probable lipid-A-disaccharide synthase                                         | 3.71    | 0.2      | 5.65     | 0.25     | 0.51     |
| SMc02110              | 1599323 | 1599821 | +              | 1599468   | 1599821  | Putative ATP-dependent Clp protease adapter protein clpS 1                     | 9.14    | 4.54     | 1.16     | 2.93     | 3.3      |
| SMc02122              | 1587257 | 1588230 | +              | 1587398   | 1588210  | Probable ferredoxin--NADP reductase                                            | 6.52    | 1.59     | 1.86     | 1.23     | 1.22     |
| SMc02162              | 532666  | 534499  | -              | 532686    | 534386   | Long-chain-fatty-acid-CoA ligase                                               | 2.39    | 9.08     | 3.51     | 2.46     | 2.42     |

Table S3.- Cont.

| CoIP-RNA <sup>2</sup> |         |         |                |           |          | Enrichment in CoIP-RNA                                                            |         |          |          |          |          |
|-----------------------|---------|---------|----------------|-----------|----------|-----------------------------------------------------------------------------------|---------|----------|----------|----------|----------|
| Gene ID <sup>1</sup>  | Start   | Stop    | S <sup>3</sup> | ORF start | ORF stop | Gene product                                                                      | Hfq-log | Hfq-stat | Hfq-cold | Hfq-heat | Hfq-salt |
| SMc02227              | 587880  | 590113  | -              | 587900    | 590113   | Putative fatty oxidation complex alpha subunit                                    | 2.89    | 6.4      | 0.18     | 1.28     | 2.12     |
| SMc02253              | 618134  | 618585  | -              | 618154    | 618459   | Putative salicylate biosynthesis protein                                          | 1.12    | 0.21     | 5.12     | 0.16     | 0.16     |
| SMc02254              | 618674  | 619698  | -              | 618694    | 619698   | Putative quinol oxidase subunit II transmembrane protein                          | 0.7     | 0.14     | 5.98     | 0.26     | 0.16     |
| SMc02271              | 638297  | 639120  | -              | 638317    | 639120   | Short-chain dehydrogenases/reductases (SDR) family protein                        | 0.93    | 0.2      | 5.55     | 0.33     | 1.07     |
| SMc02322              | 691858  | 694012  | -              | 691858    | 693957   | Hypothetical oxidoreductase                                                       | 1.94    | 8.12     | 1.76     | 0.53     | 2.31     |
| SMc02341              | 2762122 | 2763575 | -              | 2762142   | 2763575  | Carbohydrate kinase                                                               | 0.73    | 1.11     | 11.7     | 3        | 2.74     |
| SMc02355              | 2776720 | 2777393 | +              | 2776720   | 2777373  | Putative isochorismatase family protein                                           | 0.83    | 0.76     | 6.41     | 7.75     | 1.14     |
| SMc02364              | 1111502 | 1111977 | +              | 1111502   | 1111957  | Cytochrome C-type biogenesis transmembrane protein                                | 0.52    | 0.35     | 5.8      | 2        | 1.93     |
| SMc02479              | 3318478 | 3319524 | -              | 3318498   | 3319460  | Probable malate dehydrogenase                                                     | 5.03    | 0.6      | 1.13     | 2.25     | 0.92     |
| SMc02480              | 3317268 | 3318464 | -              | 3317268   | 3318464  | Probable succinyl-CoA synthetase beta chain                                       | 5.19    | 1.36     | 2.25     | 1.7      | 1.01     |
| SMc02483              | 3311686 | 3313013 | -              | 3311706   | 3312959  | Probable E2 component of 2-oxoglutarate dehydrogenase complex                     | 3.54    | 0.36     | 6.52     | 1.71     | 1.29     |
| SMc02486              | 3309537 | 3310309 | -              | 3309557   | 3310309  | Putative oxidoreductase                                                           | 2.54    | 0.37     | 18.97    | 1.85     | 4.78     |
| SMc02487              | 3308094 | 3309520 | -              | 3308114   | 3309520  | Probable E3 component of 2-oxoglutarate dehydrogenase complex                     | 4.15    | 1.47     | 6.2      | 1.78     | 1.17     |
| SMc02499              | 3293573 | 3295122 | -              | 3293593   | 3295122  | Probable ATP synthase subunit alpha                                               | 6.55    | 0.27     | 5.27     | 0.26     | 1.32     |
| SMc02520              | 3271216 | 3272800 | +              | 3271269   | 3272780  | Putative glycerol-3-phosphate dehydrogenase                                       | 0.95    | 1.18     | 1.11     | 17.14    | 3.22     |
| SMc02521              | 3270353 | 3271158 | +              | 3270374   | 3271138  | Glycerol-3-phosphate regulon repressor                                            | 9.54    | 9.45     | 3.71     | 13.27    | 4.76     |
| SMc02525              | 3266153 | 3267729 | -              | 3266173   | 3267729  | Putative NAD-dependent formate dehydrogenase beta subunit                         | 0.76    | 5.61     | 1.3      | 0.87     | 1.66     |
| SMc02562              | 52443   | 54113   | +              | 52483     | 54093    | Phosphoenolpyruvate carboxykinase                                                 | 0.91    | 25.99    | 0.53     | 0.61     | 0.1      |
| SMc02569              | 57889   | 58685   | -              | 57909     | 58685    | Probable imidazole glycerol phosphate synthase subunit HisF                       | 2.27    | 0.35     | 7.29     | 0.71     | 0.91     |
| SMc02610              | 103574  | 104524  | +              | 103599    | 104504   | Amidophosphoribosyl transferase-like protein                                      | 0.75    | 10.31    | 0.35     | 2.08     | 0.52     |
| SMc02612              | 105243  | 106591  | +              | 105243    | 106571   | Glutamate synthase family protein                                                 | 1.54    | 11.58    | 1.13     | 1.62     | 0.68     |
| SMc02645              | 1175167 | 1176477 | +              | 1175221   | 1176477  | Putative cyclopropane-fatty-acyl-phospholipid synthase                            | 1.8     | 11.53    | 0.04     | 1.44     | 0.19     |
| SMc02654              | 1168355 | 1168794 | +              | 1168355   | 1168774  | Probable holo-acyl-carrier protein synthase                                       | 2.67    | 0.16     | 0.92     | 5.07     | 0.72     |
| SMc02660              | 1201811 | 1202328 | +              | 1201811   | 1202308  | Putative acyltransferase                                                          | 3.23    | 2.83     | 6.67     | 2        | 2.36     |
| SMc02689              | 2537867 | 2539435 | -              | 2537887   | 2539395  | Probable aldehyde dehydrogenase                                                   | 5.08    | 3.48     | 6.35     | 1        | 3.7      |
| SMc02720              | 2568457 | 2569089 | -              | 2568477   | 2569064  | CLP protease proteolytic subunit                                                  | 5.02    | 2.33     | 0.87     | 0.9      | 0.47     |
| SMc02755              | 46260   | 47765   | -              | 46280     | 47680    | Probable adenosylhomocysteinase                                                   | 6.64    | 1.02     | 3.44     | 1.1      | 3.04     |
| SMc02775              | 18314   | 19353   | +              | 18314     | 19333    | Putative L-fucose dehydrogenase (D-threo aldose 1- dehydrogenase)                 | 2.28    | 3.15     | 3.49     | 2        | 5.98     |
| SMc02819              | 2375998 | 2376921 | -              | 2376018   | 2376785  | Putative ribonuclease                                                             | 2.35    | 1.15     | 1.41     | 2.57     | 6.31     |
| SMc02841              | 191420  | 192326  | -              | 191440    | 192312   | Putative methylated-DNA--protein-cysteine methyltransferase transcript. regulator | 0.61    | 6.83     | 2.19     | 0.79     | 0.29     |
| SMc02885              | 241278  | 241951  | -              | 241298    | 241951   | Probable peptide methionine sulfoxide reductase                                   | 2.36    | 9.67     | 0.27     | 1.2      | 0.23     |
| SMc03010              | 708133  | 709182  | +              | 708133    | 709182   | Protein-glutamate methyltransferase                                               | 1.23    | 0.06     | 7.08     | 0.8      | 1.1      |
| SMc03070              | 769253  | 770831  | -              | 769253    | 770728   | Glucose-6-phosphate 1-dehydrogenase                                               | 9.04    | 1.77     | 4.92     | 1.81     | 19.78    |

Table S3.- Cont.

| CoIP-RNA <sup>2</sup> |         |         |                |           |          | Enrichment in CoIP-RNA                                                      |         |          |          |          |          |
|-----------------------|---------|---------|----------------|-----------|----------|-----------------------------------------------------------------------------|---------|----------|----------|----------|----------|
| Gene ID <sup>1</sup>  | Start   | Stop    | S <sup>3</sup> | ORF start | ORF stop | Gene product                                                                | Hfq-log | Hfq-stat | Hfq-cold | Hfq-heat | Hfq-salt |
| SMc03101              | 3242093 | 3242739 | -              | 3242113   | 3242601  | Putative carbon monoxide dehydrogenase small subunit                        | 0.95    | 1.94     | 1.14     | 1.23     | 6.47     |
| SMc03102              | 3239666 | 3242065 | -              | 3239666   | 3242011  | Putative carbon monoxide dehydrogenase large subunit transmembrane protein  | 1.41    | 15.37    | 1.73     | 0.54     | 1.33     |
| SMc03109              | 3231029 | 3232009 | -              | 3231049   | 3231945  | Probable manno(fructo)kinase                                                | 1.61    | 0.24     | 15.13    | 1.67     | 1.12     |
| SMc03163              | 3121878 | 3123228 | -              | 3121898   | 3123208  | Probable xylose isomerase                                                   | 5.32    | 1.92     | 5.27     | 0.89     | 1.69     |
| SMc03164              | 3123283 | 3124757 | -              | 3123303   | 3124757  | Putative xylulose kinase                                                    | 6.62    | 4.27     | 3.84     | 0.8      | 1.4      |
| SMc03187              | 3151678 | 3152456 | -              | 3151698   | 3152456  | Probable precorrin-4 C11-methyltransferase                                  | 0.9     | 0.19     | 5.66     | 0.86     | 0.7      |
| SMc03188              | 3152475 | 3153790 | -              | 3152495   | 3153736  | Probable precorrin-6Y C5,15-methyltransferase (decarboxylating) protein     | 0.75    | 0.13     | 5.17     | 0.92     | 0.28     |
| SMc03195              | 3158982 | 3159854 | -              | 3159002   | 3159727  | Probable uracil-DNA glycosylase                                             | 1.08    | 2.21     | 1.27     | 8.36     | 2.05     |
| SMc03201              | 3164747 | 3166128 | +              | 3164896   | 3166128  | Probable 2-oxoisovalerate dehydrogenase alpha subunit                       | 1.3     | 8.37     | 3.65     | 0.62     | 3.23     |
| SMc03204              | 3168434 | 3169848 | +              | 3168434   | 3169828  | Probable E3 component of branched-chain alpha-keto acid dehydrogenase       | 0.67    | 2.11     | 5.69     | 0.18     | 1.41     |
| SMc03211              | 3175429 | 3176675 | +              | 3175543   | 3176655  | Putative 4-hydroxyphenylpyruvate dioxygenase                                | 0.74    | 22.66    | 0.2      | 2.52     | 0.36     |
| SMc03252              | 3366166 | 3367110 | -              | 3366186   | 3367034  | Putative glutamate 5-kinase                                                 | 8.22    | 0.08     | 11.19    | 3.4      | 0.94     |
| SMc03253              | 3367392 | 3368269 | -              | 3367412   | 3368254  | Putative L-proline 3-hydroxylase                                            | 2.2     | 0.01     | 4.9      | 6.2      | 0.44     |
| SMc03267              | 3383364 | 3384420 | +              | 3383404   | 3384420  | Putative dipeptidase                                                        | 3.48    | 6.3      | 0.6      | 2.32     | 2.69     |
| SMc03767              | 3433254 | 3434526 | -              | 3433274   | 3434392  | Putative arylsulfatase regulatory protein.                                  | 5.71    | 1.22     | 3.95     | 3.02     | 2        |
| SMc03773              | 3439793 | 3440425 | +              | 3439793   | 3440425  | Putative acetyltransferase                                                  | 7.26    | 1.18     | 2.02     | 0.37     | 1.7      |
| SMc03786              | 3451446 | 3451951 | -              | 3451466   | 3451951  | Probable bacterioferritin (Bfr) (cytochrome B-1) (cytochrome B-557) protein | 3.92    | 5.12     | 1.64     | 1.03     | 0.9      |
| SMc03834              | 3500693 | 3501056 | -              | 3500713   | 3501027  | Putative pterin-4-alpha-carbinolamine dehydratase                           | 1.77    | 15.4     | 1.87     | 4.67     | 4.73     |
| SMc03861              | 3525478 | 3526220 | +              | 3525478   | 3526200  | Probable tRNA guanine-N1-methyltransferase                                  | 2.35    | 0.31     | 5.12     | 0.42     | 0.45     |
| SMc03882              | 3548929 | 3549671 | -              | 3548949   | 3549596  | Putative glutathione S-transferase                                          | 4.29    | 0.15     | 5.1      | 0.45     | 0.56     |
| SMc03885              | 3551544 | 3552619 | +              | 3551544   | 3552599  | Putative histidinol-phosphate aminotransferase                              | 0.68    | 0.08     | 6.58     | 0.67     | 0.42     |
| SMc03922              | 3067709 | 3069939 | +              | 3067709   | 3069919  | Probable 1,4-alpha-glucan branching enzyme (glycogen branching enzyme)      | 1.83    | 0.33     | 5.61     | 1.57     | 1.7      |
| SMc03929              | 3078302 | 3079480 | -              | 3078322   | 3079446  | Putative zinc-type alcohol dehydrogenase transmembrane protein              | 1.89    | 0.33     | 5.02     | 0.32     | 0.51     |
| SMc03938              | 3088812 | 3090232 | -              | 3088832   | 3090232  | Probable NAD(P) transhydrogenase subunit beta transmembrane protein         | 3.08    | 0.08     | 6.59     | 0.06     | 0.33     |
| SMc03939              | 3090242 | 3090652 | -              | 3090242   | 3090652  | Probable NAD(P) transhydrogenase subunit alpha part 2 transmembrane protein | 18.4    | 0.97     | 21.46    | 0.34     | 1.39     |
| SMc03950              | 3090654 | 3092049 | -              | 3090654   | 3091802  | NAD(P) transhydrogenase subunit alpha part 1                                | 2.72    | 0.15     | 10.53    | 0.16     | 0.72     |
| SMc03983              | 2980233 | 2981384 | +              | 2980339   | 2981364  | Probable fructose-bisphosphate aldolase class I                             | 3.71    | 27.02    | 2.47     | 1.97     | 0.68     |
| SMc04001              | 2997136 | 2997636 | +              | 2997136   | 2997636  | Probable phosphoribosylaminoimidazole carboxylase catalytic subunit         | 10.05   | 1.67     | 15.43    | 1.71     | 1.54     |
| SMc04013              | 3009340 | 3010517 | +              | 3009360   | 3010517  | Putative para-aminobenzoate synthase component 1                            | 1.69    | 0.17     | 5.7      | 1.67     | 1.72     |
| SMc04019              | 3016823 | 3017921 | +              | 3016873   | 3017901  | Probable ferrochelatase                                                     | 0.81    | 0.37     | 5.79     | 0.65     | 0.2      |
| SMc04029              | 3031953 | 3033073 | +              | 3032007   | 3033053  | Putative low specificity L-threonine aldolase                               | 0.93    | 0.25     | 9.94     | 1.71     | 2.52     |
| SMc04047              | 3052166 | 3052629 | -              | 3052186   | 3052629  | Probable pseudoazurin (blue copper protein)                                 | 4.34    | 129.5    | 1        | 1.11     | 5.28     |
| SMc04048              | 3052656 | 3053017 | -              | 3052676   | 3053017  | Putative cytochrome C                                                       | 3.04    | 103.72   | 0.87     | 0.22     | 3.21     |



Table S3.- Cont.

| CoIP-RNA <sup>2</sup>                                                                    |         |         |                |           |          | Enrichment in CoIP-RNA                                                        |         |          |          |          |          |
|------------------------------------------------------------------------------------------|---------|---------|----------------|-----------|----------|-------------------------------------------------------------------------------|---------|----------|----------|----------|----------|
| Gene ID <sup>1</sup>                                                                     | Start   | Stop    | S <sup>3</sup> | ORF start | ORF stop | Gene product                                                                  | Hfq-log | Hfq-stat | Hfq-cold | Hfq-heat | Hfq-salt |
| <b>SMc04049</b>                                                                          | 3053070 | 3054343 | -              | 3053090   | 3054289  | Putative sulfite oxidase                                                      | 1.39    | 174.77   | 0.52     | 0.23     | 1.73     |
| <b>SMc04095</b>                                                                          | 3637934 | 3639915 | -              | 3637954   | 3639861  | Putative acyl-CoA synthetase                                                  | 1.15    | 7.17     | 0.88     | 0.46     | 0.66     |
| <b>SMc04124</b>                                                                          | 151452  | 151910  | +              | 151452    | 151910   | Putative cytidine deaminase                                                   | 1.46    | 1.51     | 6.23     | 2.77     | 1.69     |
| <b>SMc04146</b>                                                                          | 123668  | 126195  | -              | 123688    | 126141   | Putative phosphoketolase                                                      | 0.67    | 11.14    | 0.41     | 1.12     | 2.43     |
| <b>SMc04149</b>                                                                          | 117754  | 119111  | +              | 117754    | 119091   | Flavin-containing monooxygenase family protein / FMO family protein           | 1.78    | 51.63    | 2.2      | 1.67     | 3.45     |
| <b>SMc04153</b>                                                                          | 113789  | 114958  | +              | 113825    | 114958   | Putative aminomethyltransferase                                               | 1.87    | 69.65    | 2.26     | 16.1     | 8.46     |
| <b>SMc04172</b>                                                                          | 2161394 | 2162823 | +              | 2161394   | 2162803  | Adenylate/guanylate cyclase                                                   | 0.73    | 9.37     | 0.33     | 1.7      | 2.75     |
| <b>SMc04252</b>                                                                          | 2078744 | 2079819 | -              | 2078764   | 2079792  | Probable oxidoreductase                                                       | 5.03    | 1.01     | 2.97     | 0.8      | 0.79     |
| <b>SMc04268</b>                                                                          | 2096393 | 2097351 | -              | 2096413   | 2097351  | LpxXL C28-acyltransferase                                                     | 1.16    | 0.26     | 5.63     | 0.89     | 1.01     |
| <b>SMc04277</b>                                                                          | 2101114 | 2101644 | -              | 2101114   | 2101590  | Putative (3R)-hydroxymyristoyl-[acyl carrier] dehydratase transmembr. protein | 3.43    | 7.42     | 1.52     | 0.54     | 1.03     |
| <b>SMc04278</b>                                                                          | 2101742 | 2102133 | -              | 2101762   | 2102049  | Acyl carrier protein for transfer of long hydroxylated fatty acids to lipid A | 2.98    | 0.52     | 2.59     | 0.66     | 5.43     |
| <b>SMc04290</b>                                                                          | 2109844 | 2110817 | -              | 2109864   | 2110817  | Probable amidase                                                              | 0.66    | 7.52     | 1.41     | 0.24     | 0.21     |
| <b>SMc04302</b>                                                                          | 2116207 | 2116871 | -              | 2116227   | 2116871  | Probable Cob(I)alamin adenosyltransferase                                     | 5.34    | 1.67     | 7.91     | 1        | 1.79     |
| <b>SMc04322</b>                                                                          | 2223890 | 2224959 | +              | 2223890   | 2224939  | Putative oxidoreductase                                                       | 11.15   | 48.9     | 2.67     | 7.17     | 4.59     |
| <b>SMc04342</b>                                                                          | 2147101 | 2148117 | +              | 2147155   | 2148117  | Methyltransferase                                                             | 6.66    | 0.26     | 1.61     | 0.37     | 0.27     |
| <b>SMc04346</b>                                                                          | 2230722 | 2231761 | -              | 2230742   | 2231761  | Ketol-acid reductoisomerase                                                   | 9.11    | 0.82     | 0.74     | 1.41     | 0.05     |
| <b>SMc04397</b>                                                                          | 3601170 | 3602704 | -              | 3601190   | 3602704  | Putative L-sorbose dehydrogenase, NADP dependent protein                      | 1.57    | 5.01     | 1.48     | 2.53     | 0.59     |
| <b>SMc04444</b>                                                                          | 3263034 | 3265913 | -              | 3263034   | 3265913  | Probable NAD-dependent formate dehydrogenase alpha subunit                    | 0.97    | 8.6      | 2.28     | 1.16     | 2.69     |
| <b><i>Regulation of transcription: transcription factors and signal transduction</i></b> |         |         |                |           |          |                                                                               |         |          |          |          |          |
| <b>SMA0662</b>                                                                           | 350905  | 351644  | -              | 350925    | 351560   | Transcriptional regulator, CAP/Crp family                                     | 7.26    | 1.69     | 4.63     | 3.14     | 1.83     |
| <b>SMA0806</b>                                                                           | 441520  | 442106  | +              | 441631    | 442086   | SyrB3 regulator                                                               | 8.45    | 11.77    | 3.81     | 3.11     | 1.47     |
| <b>SMA1179</b>                                                                           | 645644  | 647963  | +              | 645676    | 647943   | NosR regulatory protein                                                       | 0.84    | 0.03     | 23.65    | 1.33     | 0.71     |
| <b>SMA1207</b>                                                                           | 661849  | 662589  | -              | 661869    | 662549   | Transcriptional regulator, CAP/Crp family                                     | 0.48    | 0.01     | 27.9     | 2.5      | 0.76     |
| <b>SMA1480</b>                                                                           | 813927  | 814922  | +              | 814015    | 814902   | Transcriptional regulator, LysR family                                        | 3.72    | 1.11     | 6.71     | 4.57     | 2.2      |
| <b>SMA1505</b>                                                                           | 830315  | 831188  | +              | 830383    | 831168   | Transcriptional regulator, GntR family                                        | 4.84    | 2.41     | 3.47     | 13.42    | 3.2      |
| <b>SMA1548</b>                                                                           | 854157  | 857457  | +              | 854222    | 857437   | Diguanylate cyclase/phosphodiesterase                                         | 0.63    | 10.44    | 1.02     | 2.18     | 4.68     |
| <b>SMA1558</b>                                                                           | 862096  | 864222  | +              | 862096    | 864222   | Sensor histidine kinase                                                       | 1.47    | 6.4      | 1.17     | 2.6      | 2.04     |
| <b>SMA1586</b>                                                                           | 879839  | 880366  | -              | 879859    | 880314   | SyrB2 regulator                                                               | 36.48   | 16.97    | 11.6     | 9.4      | 5.06     |
| <b>SMA1698</b>                                                                           | 957908  | 958406  | -              | 957928    | 958383   | SyrB1 regulator                                                               | 4.8     | 5.65     | 4.64     | 2.29     | 2.35     |
| <b>SMA2215</b>                                                                           | 1240743 | 1241607 | +              | 1240832   | 1241587  | Transcriptional regulator, GntR family                                        | 1.12    | 2.54     | 0.18     | 5.95     | 0.64     |
| <b>SMA5007</b>                                                                           | 550324  | 550724  | -              | 550344    | 550724   | Possible transcriptional regulator                                            | 6.22    | 9.07     | 0.02     | 2.01     | 0.28     |
| <b>SMB20014</b>                                                                          | 20357   | 21378   | -              | 20377     | 21378    | probable transcriptional regulator                                            | 0.82    | 0.8      | 7.8      | 1.5      | 2.28     |
| <b>SMB20162</b>                                                                          | 179966  | 180786  | +              | 180077    | 180766   | probable transcriptional regulator                                            | 1.18    | 2.88     | 7.32     | 1.4      | 2.28     |

Table S3.- Cont.

| CoIP-RNA <sup>2</sup> |         |         |                |           |          | Enrichment in CoIP-RNA                                        |         |          |          |          |          |
|-----------------------|---------|---------|----------------|-----------|----------|---------------------------------------------------------------|---------|----------|----------|----------|----------|
| Gene ID <sup>1</sup>  | Start   | Stop    | S <sup>3</sup> | ORF start | ORF stop | Gene product                                                  | Hfq-log | Hfq-stat | Hfq-cold | Hfq-heat | Hfq-salt |
| <b>Smb20294</b>       | 301194  | 301915  | +              | 301194    | 301895   | putative transcriptional regulator                            | 1.13    | 5.41     | 1.36     | 0.96     | 3.74     |
| <b>Smb20367</b>       | 379510  | 380306  | -              | 379530    | 380222   | putative transcriptional regulator protein                    | 0.9     | 1.6      | 1.34     | 2.29     | 5.48     |
| <b>Smb20455</b>       | 467338  | 468026  | -              | 467358    | 467972   | putative transcriptional regulator protein                    | 0.75    | 12.89    | 0.49     | 2.31     | 0.48     |
| <b>Smb20480</b>       | 494013  | 494815  | +              | 494013    | 494795   | putative transcriptional regulator protein                    | 5.18    | 1.05     | 0.5      | 0.27     | 7.45     |
| <b>Smb20613</b>       | 1630003 | 1631405 | +              | 1630003   | 1631385  | C4-dicarboxylate transport transcriptional regulatory protein | 0.98    | 0.42     | 7.13     | 2.44     | 3.92     |
| <b>Smb20773</b>       | 1565787 | 1566564 | +              | 1565858   | 1566544  | putative transcriptional regulator, GntR family protein       | 1.12    | 1.52     | 2.22     | 5.41     | 3.9      |
| <b>Smb20933*</b>      | 1157673 | 1160420 | +              | 1157697   | 1160420  | putative two-component sensor histidine kinase protein        | 0.35    | 24.67    | 0.03     | 1.31     | 2.37     |
| <b>Smb20934</b>       | 1160417 | 1160973 | +              | 1160417   | 1160953  | putative two-component response regulator protein             | 1.04    | 33.07    | 0.1      | 1.33     | 5.71     |
| <b>Smb21117</b>       | 758115  | 758628  | -              | 758135    | 758593   | putative transcriptional regulator protein                    | 1.48    | 7.42     | 0.82     | 1.77     | 2.14     |
| <b>Smb21200</b>       | 950500  | 951863  | -              | 950520    | 951863   | putative two-component response regulator protein             | 0.95    | 6.12     | 0.68     | 0.2      | 2.37     |
| <b>Smb21291</b>       | 867040  | 868108  | -              | 867060    | 868007   | putative transcriptional regulator, lysR family protein       | 41.88   | 16.97    | 26.51    | 16.75    | 12.82    |
| <b>Smb21372</b>       | 1036526 | 1037658 | -              | 1036546   | 1037604  | putative transcriptional regulator, LacI family protein       | 1.32    | 2.79     | 0.76     | 0.45     | 6.06     |
| <b>Smb21419</b>       | 1349024 | 1350024 | -              | 1349044   | 1349931  | putative transcriptional regulator, araC family protein       | 4.34    | 1.77     | 1.35     | 15.6     | 2.8      |
| <b>Smb21571</b>       | 1110151 | 1110851 | +              | 1110205   | 1110831  | putative transcriptional regulator TetR family protein        | 1.46    | 0.62     | 0.55     | 7.95     | 3.72     |
| <b>Smb21579</b>       | 1119447 | 1119965 | +              | 1119502   | 1119945  | putative transcriptional regulator, merR family protein       | 3.17    | 13.9     | 0.37     | 2.81     | 1.52     |
| <b>Smb22017</b>       | 1655147 | 1656259 | -              | 1655147   | 1656175  | Mutated LacI family transcriptional regulator                 | 1.34    | 0.47     | 5.17     | 0.92     | 4.07     |
| <b>SMc00131</b>       | 2038070 | 2038601 | -              | 2038090   | 2038578  | Transcription regulator AsnC family                           | 5.52    | 1.25     | 9.08     | 0.39     | 1.1      |
| <b>SMc00347</b>       | 302509  | 302995  | -              | 302529    | 302936   | Putative regulator of nucleoside diphosphate kinase           | 3.86    | 8.59     | 1.17     | 0.58     | 0.44     |
| <b>SMc00720</b>       | 2861658 | 2862152 | -              | 2861678   | 2862037  | Putative 2-component receiver domain protein                  | 3.48    | 10.84    | 4.58     | 0.37     | 1.67     |
| <b>SMc00888</b>       | 895194  | 896984  | +              | 895248    | 896984   | Putative 2-component receiver domain protein                  | 1.26    | 0.14     | 12.72    | 0.8      | 1.1      |
| <b>SMc00947</b>       | 1774230 | 1774697 | +              | 1774339   | 1774677  | Nitrogen regulatory protein PII                               | 1.57    | 0.68     | 4.83     | 2.16     | 11.45    |
| <b>SMc01042</b>       | 1568272 | 1569420 | +              | 1568272   | 1569420  | Nitrogen assimilation regulatory protein                      | 1.04    | 0.42     | 1        | 6.43     | 3.44     |
| <b>SMc01043</b>       | 1569417 | 1570891 | +              | 1569417   | 1570871  | Nitrogen assimilation regulatory protein                      | 2.12    | 0.39     | 1.2      | 7.21     | 3.04     |
| <b>SMc01110</b>       | 445312  | 445874  | +              | 445435    | 445854   | Transcription regulator                                       | 24.13   | 3.9      | 4.58     | 7.74     | 4.04     |
| <b>SMc01141</b>       | 409754  | 410314  | -              | 409774    | 410238   | Probable nitrogen regulatory IIA protein                      | 3.98    | 9.16     | 1.98     | 2.24     | 3.47     |
| <b>SMc01225</b>       | 1699124 | 1700153 | -              | 1699144   | 1700040  | Transcription regulator LysR family                           | 3.36    | 1.18     | 6.05     | 2.95     | 4.53     |
| <b>SMc01585</b>       | 2520885 | 2521227 | +              | 2520992   | 2521207  | Putative cold shock transcription regulator                   | 2.86    | 5.38     | 1.35     | 1.26     | 0.26     |
| <b>SMc01768</b>       | 1314360 | 1314982 | +              | 1314450   | 1314962  | Transcription regulator MarR family                           | 4.75    | 45.61    | 18.42    | 0.38     | 4.64     |
| <b>SMc01819</b>       | 2642730 | 2643536 | -              | 2642750   | 2643391  | Transcription regulator TetR family                           | 27.74   | 34.59    | 26.68    | 18.31    | 8.05     |
| <b>SMc01836</b>       | 2660070 | 2660407 | +              | 2660070   | 2660387  | Putative DNA-binding protein                                  | 7.03    | 2.54     | 0.45     | 0.94     | 1.14     |
| <b>SMc01908</b>       | 1370272 | 1370786 | -              | 1370272   | 1370745  | Transcription regulator MarR family                           | 1.24    | 3.93     | 0.97     | 1.87     | 6.09     |
| <b>SMc01945</b>       | 2667610 | 2668103 | +              | 2667667   | 2668083  | Organic hydroperoxide resistance transcriptional regulator    | 0.75    | 6.87     | 0.47     | 0.87     | 2.49     |
| <b>SMc02036</b>       | 2742434 | 2743290 | +              | 2742563   | 2743270  | Putative transcription regulator                              | 0.69    | 7.48     | 0.21     | 0.88     | 0.22     |

Table S3.- Cont.

| CoIP-RNA <sup>2</sup>                                                                       |         |         |                |           |          | Enrichment in CoIP-RNA                                                        |         |          |          |          |          |
|---------------------------------------------------------------------------------------------|---------|---------|----------------|-----------|----------|-------------------------------------------------------------------------------|---------|----------|----------|----------|----------|
| Gene ID <sup>1</sup>                                                                        | Start   | Stop    | S <sup>3</sup> | ORF start | ORF stop | Gene product                                                                  | Hfq-log | Hfq-stat | Hfq-cold | Hfq-heat | Hfq-salt |
| SMc02151                                                                                    | 560227  | 560667  | -              | 560247    | 560579   | Virulence-associated protein                                                  | 5.13    | 2.76     | 5.14     | 2.37     | 3.5      |
| SMc02172                                                                                    | 522311  | 523608  | -              | 522311    | 523540   | Transcriptional regulator, ROK family                                         | 1.17    | 14.76    | 0.07     | 1.55     | 1.72     |
| SMc02248                                                                                    | 610614  | 611335  | +              | 610668    | 611315   | Transcriptional regulatory protein                                            | 2.48    | 5.99     | 11.63    | 1.23     | 1.5      |
| SMc02620                                                                                    | 111736  | 112553  | +              | 111802    | 112533   | Putative HTH-type transcriptional regulator                                   | 5.05    | 4        | 6.82     | 1.05     | 2.59     |
| SMc03060                                                                                    | 756348  | 757503  | -              | 756368    | 757438   | Transcriptional regulator                                                     | 7.26    | 0.52     | 13.52    | 2.33     | 1.8      |
| SMc03150                                                                                    | 3176725 | 3177642 | -              | 3176745   | 3177458  | Transcription regulator LuxR family                                           | 2.2     | 6.5      | 2.17     | 4.89     | 4.67     |
| SMc03165                                                                                    | 3124767 | 3125858 | -              | 3124767   | 3125804  | Transcription regulator LacI family                                           | 5.2     | 5.3      | 4.38     | 1.2      | 5.3      |
| SMc03210                                                                                    | 3174913 | 3175494 | -              | 3174933   | 3175412  | Transcription regulator, AsnC family                                          | 1.44    | 8.66     | 0.57     | 1.17     | 1.07     |
| SMc03806                                                                                    | 3471166 | 3471599 | +              | 3471241   | 3471579  | Probable nitrogen regulatory protein PII 2                                    | 1.04    | 1.42     | 0.8      | 0.67     | 6.19     |
| SMc03820                                                                                    | 3486734 | 3487470 | -              | 3486754   | 3487437  | Putative transcription regulator                                              | 5.65    | 27.96    | 4.59     | 6.35     | 7.7      |
| SMc03880                                                                                    | 3547909 | 3548546 | +              | 3547948   | 3548526  | Polyhydroxyalkanoate and exopolysaccharide biosynthesis transcript. regulator | 18.2    | 4.57     | 22.28    | 23.58    | 22.57    |
| SMc04297                                                                                    | 2114253 | 2114867 | -              | 2114253   | 2114867  | Putative response regulator                                                   | 0.52    | 2.95     | 6.45     | 1.5      | 0.61     |
| SMc05011                                                                                    | 3359808 | 3360048 | +              | 3359852   | 3360028  | Putative bacteriophage DNA-binding transcription regulator                    | 5.73    | 24.46    | 0.09     | 2.22     | 0.46     |
| <b><i>Regulation of transcription: ECFs and alternative <math>\sigma</math> factors</i></b> |         |         |                |           |          |                                                                               |         |          |          |          |          |
| SMB21484*                                                                                   | 1405275 | 1405859 | +              | 1405318   | 1405839  | RpoE5 ( $\sigma$ 24)                                                          | 0.19    | 8.27     | 0.01     | 1.67     | 2.43     |
| SMc01419                                                                                    | 2267073 | 2267627 | +              | 2267073   | 2267627  | RpoE1                                                                         | 0.43    | 5.7      | 1.8      | 3        | 3.65     |
| SMc01504*                                                                                   | 2624260 | 2625164 | +              | 2624350   | 2625144  | Receiver domain                                                               | 0.57    | 64.44    | 0.01     | 1.38     | 1.72     |
| SMc01505*                                                                                   | 2624022 | 2624246 | -              | 2624022   | 2624189  | Anti-sigma factor                                                             | 0.57    | 9.92     | 0.05     | 1.54     | 2.47     |
| SMc01506*                                                                                   | 2623440 | 2624014 | -              | 2623460   | 2624014  | RpoE2 ( $\sigma$ 24)                                                          | 0.69    | 56.45    | 0.11     | 2.84     | 3.09     |
| SMc03873*                                                                                   | 3538486 | 3539426 | -              | 3538506   | 3539372  | RpoH2 ( $\sigma$ 32)                                                          | 0.94    | 13.89    | 0.03     | 1.06     | 1.12     |
| SMc04051                                                                                    | 3055204 | 3055806 | -              | 3055204   | 3055740  | RpoE4 ( $\sigma$ 24)                                                          | 1.11    | 53.84    | 1.05     | 0.67     | 0.56     |
| SMc01139                                                                                    | 411244  | 412876  | -              | 411264    | 412808   | RpoN ( $\sigma$ 54)                                                           | 2.12    | 0.86     | 1.53     | 6.16     | 3.6      |
| SMc01140                                                                                    | 410393  | 411076  | -              | 410413    | 410985   | Probable $\sigma$ 54 modulation protein                                       | 4.31    | 12.28    | 0.82     | 3.08     | 4.32     |
| <b><i>Nodulation and nitrogen fixation</i></b>                                              |         |         |                |           |          |                                                                               |         |          |          |          |          |
| SMA0615                                                                                     | 328632  | 329404  | +              | 328632    | 329384   | FixO3 cytochrome-c oxidase subunit                                            | 1.14    | 6.1      | 0.31     | 1.45     | 0.73     |
| SMA0617                                                                                     | 329568  | 330449  | +              | 329568    | 330449   | FixP3 Diheme c-type cytochrome                                                | 0.26    | 5.51     | 0.22     | 0.87     | 0.71     |
| SMA0773                                                                                     | 419144  | 420714  | +              | 419284    | 420714   | NoeA host specific nodulation protein                                         | 5.57    | 1.77     | 3.96     | 0.8      | 7.18     |
| SMA0815                                                                                     | 445875  | 447573  | -              | 445895    | 447520   | NifA transcriptional activator                                                | 6.06    | 0.51     | 2.59     | 1.91     | 1.55     |
| SMA0827                                                                                     | 454495  | 456071  | +              | 454549    | 456051   | NifD nitrogenase molybdenum-iron protein alpha chain                          | 5.39    | 0.94     | 5.93     | 1.33     | 2.1      |
| SMA0851                                                                                     | 468179  | 468996  | -              | 468199    | 468942   | NodH sulfotransferase                                                         | 5.81    | 0.63     | 0.48     | 0.58     | 0.63     |
| SMA1208                                                                                     | 662603  | 662790  | -              | 662623    | 662790   | FixS1 nitrogen fixation protein                                               | 1.57    | 0.17     | 40.5     | 2        | 0.61     |
| SMA1209                                                                                     | 662787  | 665060  | -              | 662787    | 665060   | FixI1 ATPase                                                                  | 0.82    | 0.03     | 50.2     | 4        | 16.43    |
| SMA1210                                                                                     | 665057  | 665560  | -              | 665057    | 665560   | FixH nitrogen fixation protein                                                | 3.17    | 0.04     | 67.5     | 1        | 1.37     |

Table S3.- Cont.

| CoIP-RNA <sup>2</sup>                                                      |         |         |                |           |          | Enrichment in CoIP-RNA                                            |         |          |          |          |          |
|----------------------------------------------------------------------------|---------|---------|----------------|-----------|----------|-------------------------------------------------------------------|---------|----------|----------|----------|----------|
| Gene ID <sup>1</sup>                                                       | Start   | Stop    | S <sup>3</sup> | ORF start | ORF stop | Gene product                                                      | Hfq-log | Hfq-stat | Hfq-cold | Hfq-heat | Hfq-salt |
| <b>SMa1211</b>                                                             | 665557  | 667162  | -              | 665557    | 667131   | FixG iron sulfur membrane protein                                 | 0.77    | 0.02     | 27.16    | 2.18     | 0.77     |
| <b>SMa1213</b>                                                             | 667340  | 668229  | -              | 667360    | 668229   | FixP1 di-heme c-type cytochrome                                   | 2.87    | 0.05     | 101.4    | 7        | 2.43     |
| <b>SMa1214</b>                                                             | 668233  | 668385  | -              | 668233    | 668385   | FixQ1 nitrogen fixation protein                                   | 8.37    | 0.17     | 23.1     | 2        | 0.61     |
| <b>SMa1216</b>                                                             | 668398  | 669129  | -              | 668398    | 669129   | FixO1 cytochrome C oxidase subunit                                | 2.05    | 0.05     | 31.2     | 5        | 0.76     |
| <b>SMa1220</b>                                                             | 669143  | 670819  | -              | 669143    | 670762   | FixN1 cytochrome c oxidase subunit 1                              | 1.51    | 0.01     | 58.08    | 3.2      | 0.97     |
| <b>Smb20879*</b>                                                           | 1285191 | 1285705 | -              | 1285211   | 1285663  | putative protein required for attachment to host cells            | 4.26    | 62.67    | 0.26     | 1.44     | 8.85     |
| <b>SMc01521</b>                                                            | 2611709 | 2612133 | +              | 2611709   | 2612113  | Repressor of nitrogen fixation genes, negatively autoregulated    | 7.31    | 4.05     | 1.2      | 1.71     | 1.39     |
| <b>SMc05009</b>                                                            | 2594996 | 2595537 | +              | 2595019   | 2595537  | Nodulation protein NoIR inactivated by a frameshift               | 0.45    | 10.01    | 5.63     | 1.19     | 10.33    |
| <b><i>Quorum sensing, motility, chemotaxis and EPS II biosynthesis</i></b> |         |         |                |           |          |                                                                   |         |          |          |          |          |
| <b>SMb21307</b>                                                            | 969800  | 970797  | -              | 969820    | 970797   | hypothetical protein WgeH (formerly ExpE8)                        | 1.56    | 0.33     | 8.8      | 0.19     | 0.84     |
| <b>SMb21309</b>                                                            | 972161  | 974377  | -              | 972161    | 974377   | putative membrane protein WgeF (formerly ExpE6)                   | 1.12    | 0.22     | 5.19     | 0.04     | 1.05     |
| <b>SMb21310</b>                                                            | 974386  | 975090  | -              | 974386    | 975090   | putative membrane protein WgeE (formerly ExpE5)                   | 1.65    | 0.24     | 5.51     | 0.15     | 1.24     |
| <b>SMb21323</b>                                                            | 992615  | 993807  | +              | 992615    | 993787   | putative protein WgaF (formerly ExpA6)                            | 11.53   | 0.34     | 14.02    | 0.24     | 5.49     |
| <b>SMc00168</b>                                                            | 1996835 | 1997527 | +              | 1996863   | 1997507  | N-acyl-L-homoserine lactone synthetase (SinI)                     | 0.97    | 10.93    | 0.15     | 0.03     | 0.04     |
| <b>SMc03004</b>                                                            | 702118  | 703793  | +              | 702172    | 703773   | IcpA/McpE internal chemotaxis protein                             | 0.99    | 0.11     | 5.6      | 0.44     | 1.01     |
| <b>SMc03005</b>                                                            | 703799  | 704092  | +              | 703799    | 704092   | conserved hypothetical protein contains an anti-anti-sigma domain | 5.94    | 0.18     | 11.7     | 7        | 1.22     |
| <b>SMc03006</b>                                                            | 704096  | 704481  | +              | 704096    | 704461   | Chemotaxis regulator protein                                      | 7.33    | 0.34     | 1.6      | 0.44     | 0.68     |
| <b>SMc03007</b>                                                            | 704482  | 706758  | +              | 704482    | 706758   | Chemotaxis protein (sensory transduction histidine kinase)        | 1.54    | 0.08     | 11.25    | 1.5      | 1.98     |
| <b>SMc03011</b>                                                            | 709182  | 709571  | +              | 709182    | 709571   | Response regulators with a CheY-like receiver domain              | 5.24    | 0.41     | 7.56     | 0.8      | 2.43     |
| <b>SMc03013</b>                                                            | 710149  | 710543  | +              | 710149    | 710523   | conserved hypothetical protein                                    | 4.19    | 0.21     | 6.6      | 1.5      | 1.37     |
| <b>SMc03014</b>                                                            | 711451  | 713282  | +              | 711589    | 713262   | Flagellar M-ring transmembrane protein                            | 1.3     | 0.39     | 7.68     | 2.4      | 1.95     |
| <b>SMc03019</b>                                                            | 717304  | 718415  | -              | 717324    | 718361   | Flagellar motor switch protein                                    | 1.2     | 0.19     | 5.4      | 0.6      | 0.73     |
| <b>SMc03020</b>                                                            | 718429  | 719081  | -              | 718449    | 719081   | Flagellar motor switch protein                                    | 0.35    | 0.2      | 6.2      | 1.33     | 1.01     |
| <b>SMc03022</b>                                                            | 720050  | 720956  | -              | 720050    | 720928   | Chemotaxis (motility protein A) transmembrane                     | 2.07    | 0.75     | 12       | 2        | 1.22     |
| <b>SMc03030</b>                                                            | 726091  | 726899  | +              | 726091    | 726879   | Flagellar basal-body rod protein                                  | 0.92    | 0.2      | 6.9      | 1.5      | 0.91     |
| <b>SMc03034</b>                                                            | 729052  | 729762  | +              | 729052    | 729762   | Flagellar L-ring protein precursor (basal body L- ring protein)   | 0.98    | 0.18     | 9.6      | 2.67     | 0.61     |
| <b>SMc03037</b>                                                            | 731156  | 732489  | +              | 731285    | 732469   | Flagellin A                                                       | 1.13    | 0.37     | 6.33     | 0.2      | 0.97     |
| <b>SMc03038</b>                                                            | 732695  | 734016  | +              | 732812    | 733996   | Flagellin B                                                       | 2.99    | 1.54     | 7.72     | 0.18     | 0.91     |
| <b>SMc03039</b>                                                            | 734146  | 735487  | +              | 734262    | 735467   | Flagellin D                                                       | 0.89    | 0.29     | 8.93     | 0.44     | 1.66     |
| <b>SMc03040</b>                                                            | 735635  | 736770  | +              | 735785    | 736750   | Flagellin C                                                       | 3.38    | 24.65    | 2.39     | 0.32     | 7.35     |
| <b>SMc03044</b>                                                            | 740239  | 741666  | +              | 740239    | 741666   | FliK hook length control protein                                  | 1.97    | 0.23     | 15       | 2        | 3.04     |
| <b>SMc03047</b>                                                            | 743180  | 744422  | +              | 743202    | 744422   | Flagellar hook protein                                            | 1.12    | 0.07     | 6.83     | 1.23     | 0.94     |
| <b>SMc03048</b>                                                            | 744491  | 745924  | +              | 744506    | 745924   | Putative flagellar hook-associated protein                        | 1.11    | 0.1      | 15.48    | 1.6      | 0.85     |

Table S3.- Cont.

| CoIP-RNA <sup>2</sup> |         |         |                |           |          | Enrichment in CoIP-RNA                            |         |          |          |          |          |
|-----------------------|---------|---------|----------------|-----------|----------|---------------------------------------------------|---------|----------|----------|----------|----------|
| Gene ID <sup>1</sup>  | Start   | Stop    | S <sup>3</sup> | ORF start | ORF stop | Gene product                                      | Hfq-log | Hfq-stat | Hfq-cold | Hfq-heat | Hfq-salt |
| <b>SMc03049</b>       | 745927  | 746984  | +              | 745927    | 746964   | Putative flagellar hook-associated protein        | 0.49    | 0.19     | 7.4      | 0.67     | 0.71     |
| <b>SMc03051</b>       | 747346  | 747795  | +              | 747346    | 747795   | Putative flagellin synthesis repressor protein    | 2.45    | 0.43     | 6.48     | 0.8      | 1.46     |
| <b>Translation</b>    |         |         |                |           |          |                                                   |         |          |          |          |          |
| <b>SMb20049</b>       | 60280   | 62291   | +              | 60310     | 62271    | putative elongation factor G protein              | 0.98    | 9.36     | 1.32     | 0.2      | 1.25     |
| <b>SMb21157</b>       | 901188  | 901637  | +              | 901228    | 901617   | putative translation initiation inhibitor protein | 2.81    | 1.12     | 0.84     | 5.65     | 0.42     |
| <b>SMc00323</b>       | 276550  | 276975  | +              | 276686    | 276955   | Probable 30S ribosomal protein S15                | 28.38   | 12.09    | 8.08     | 5.94     | 13.54    |
| <b>SMc00357</b>       | 312171  | 312840  | +              | 312251    | 312820   | Probable elongation factor P                      | 1.94    | 0.3      | 6.47     | 0.24     | 0.72     |
| <b>SMc00363</b>       | 318407  | 318727  | +              | 318504    | 318707   | Probable 50S ribosomal protein L35                | 94.28   | 1.04     | 6.7      | 6.72     | 10.29    |
| <b>SMc00364</b>       | 318744  | 319168  | +              | 318744    | 319148   | Probable 50S ribosomal protein L20                | 37.82   | 1        | 8.6      | 2.92     | 1.79     |
| <b>SMc00403</b>       | 354073  | 355401  | -              | 354093    | 355382   | probable Sun protein (FMU protein)                | 3.83    | 0.26     | 11.16    | 0.56     | 1.12     |
| <b>SMc00565</b>       | 1236088 | 1236710 | -              | 1236108   | 1236683  | Probable 50S ribosomal protein L9                 | 8.97    | 0.13     | 5.92     | 0.59     | 1.89     |
| <b>SMc00567</b>       | 1237846 | 1238114 | -              | 1237866   | 1238114  | Putative 30S ribosomal protein S18                | 8.71    | 0.48     | 6.96     | 0.7      | 1.88     |
| <b>SMc00568</b>       | 1238120 | 1238804 | -              | 1238140   | 1238589  | Putative 30S ribosomal protein S6                 | 7.67    | 0.24     | 5.06     | 0.49     | 1.48     |
| <b>SMc01152</b>       | 398018  | 398424  | +              | 398138    | 398404   | 30S ribosomal protein S20                         | 6.84    | 0.82     | 24.18    | 0.95     | 6.86     |
| <b>SMc01290</b>       | 1487883 | 1488373 | +              | 1487883   | 1488353  | Probable 50S ribosomal protein L15                | 25.95   | 0.34     | 5.73     | 1        | 1.1      |
| <b>SMc01291</b>       | 1487666 | 1487869 | +              | 1487666   | 1487869  | Probable 50S ribosomal protein L30                | 68.91   | 1.03     | 10.82    | 0.51     | 1.17     |
| <b>SMc01292</b>       | 1487084 | 1487653 | +              | 1487084   | 1487653  | Probable 30S ribosomal protein S5                 | 136.66  | 4.44     | 9.89     | 1.09     | 1.21     |
| <b>SMc01293</b>       | 1486588 | 1486970 | +              | 1486588   | 1486950  | Probable 50S ribosomal protein L18                | 27.78   | 2.56     | 5.18     | 0.54     | 3.82     |
| <b>SMc01294</b>       | 1486020 | 1486575 | +              | 1486042   | 1486575  | Probable 50S ribosomal protein L6                 | 17.76   | 0.56     | 3.92     | 0.81     | 0.94     |
| <b>SMc01295</b>       | 1485603 | 1486021 | +              | 1485603   | 1486001  | Probable 30S ribosomal protein S8                 | 5.33    | 0.09     | 2.57     | 0.51     | 0.66     |
| <b>SMc01296</b>       | 1485285 | 1485590 | +              | 1485285   | 1485590  | Probable 30S ribosomal protein S14                | 14.18   | 0.32     | 2.51     | 0.74     | 0.58     |
| <b>SMc01297</b>       | 1484693 | 1485270 | +              | 1484693   | 1485250  | Probable 50S ribosomal protein L5                 | 9.04    | 0.14     | 2.74     | 0.27     | 0.58     |
| <b>SMc01298</b>       | 1484389 | 1484700 | +              | 1484389   | 1484700  | Probable 50S ribosomal protein L24                | 33.27   | 0.88     | 3.76     | 0.38     | 0.45     |
| <b>SMc01299</b>       | 1483889 | 1484374 | +              | 1484006   | 1484374  | Probable 50S ribosomal protein L14                | 27.27   | 10.08    | 12.64    | 1.18     | 10.65    |
| <b>SMc01300</b>       | 1483591 | 1483847 | +              | 1483591   | 1483827  | Probable 30S ribosomal protein S17                | 55.59   | 0.51     | 7.97     | 1.75     | 1        |
| <b>SMc01301</b>       | 1483377 | 1483577 | +              | 1483377   | 1483577  | Probable 50S ribosomal protein L29                | 78.29   | 1.3      | 1.86     | 0.74     | 0.41     |
| <b>SMc01302</b>       | 1482932 | 1483364 | +              | 1482951   | 1483364  | Probable 50S ribosomal protein L16                | 106.19  | 0.81     | 10.56    | 2.04     | 0.68     |
| <b>SMc01303</b>       | 1482199 | 1482932 | +              | 1482199   | 1482912  | Probable 30S ribosomal protein S3                 | 44.45   | 0.6      | 9.81     | 1.43     | 1.34     |
| <b>SMc01304</b>       | 1481810 | 1482199 | +              | 1481810   | 1482199  | Probable 50S ribosomal protein L22                | 36.23   | 0.19     | 9.47     | 2.35     | 0.59     |
| <b>SMc01305</b>       | 1481529 | 1481807 | +              | 1481529   | 1481807  | Probable 30S ribosomal protein S19                | 36.23   | 0.3      | 2.16     | 0.46     | 0.2      |
| <b>SMc01306</b>       | 1480677 | 1481513 | +              | 1480677   | 1481513  | Probable 50S ribosomal protein L2                 | 10.77   | 0.1      | 3.7      | 0.72     | 0.36     |
| <b>SMc01307</b>       | 1480340 | 1480653 | +              | 1480340   | 1480633  | Probable 50S ribosomal protein L23                | 24.18   | 0.31     | 2.9      | 1.1      | 0.39     |
| <b>SMc01308</b>       | 1479723 | 1480343 | +              | 1479723   | 1480343  | Probable 50S ribosomal protein L4                 | 12.39   | 0.09     | 2.82     | 0.51     | 0.35     |

Table S3.- Cont.

| CoIP-RNA <sup>2</sup>                      |         |         |                |           |          | Enrichment in CoIP-RNA                              |         |          |          |          |          |
|--------------------------------------------|---------|---------|----------------|-----------|----------|-----------------------------------------------------|---------|----------|----------|----------|----------|
| Gene ID <sup>1</sup>                       | Start   | Stop    | S <sup>3</sup> | ORF start | ORF stop | Gene product                                        | Hfq-log | Hfq-stat | Hfq-cold | Hfq-heat | Hfq-salt |
| SMc01309                                   | 1478970 | 1479710 | +              | 1479024   | 1479710  | Probable 50S ribosomal protein L3                   | 86.81   | 0.76     | 9.81     | 2.71     | 0.83     |
| SMc01310                                   | 1478536 | 1478921 | +              | 1478593   | 1478901  | Probable 30S ribosomal protein S10                  | 40.26   | 0.96     | 13.01    | 2.36     | 2.01     |
| SMc01311                                   | 1477261 | 1478470 | +              | 1477275   | 1478450  | Probable elongation factor TU protein               | 6.78    | 0.28     | 2.66     | 0.87     | 0.74     |
| SMc01312                                   | 1475104 | 1477223 | +              | 1475104   | 1477203  | Probable elongation factor G                        | 7.55    | 0.14     | 3.04     | 0.32     | 0.27     |
| SMc01313                                   | 1474604 | 1475094 | +              | 1474604   | 1475074  | Probable 30S ribosomal protein S7                   | 7.42    | 0.31     | 1.16     | 0.27     | 0.15     |
| SMc01318                                   | 1463666 | 1464066 | +              | 1463666   | 1464046  | Probable 50S ribosomal protein L7/L12 (L8)          | 5.61    | 0.19     | 4.33     | 0.21     | 2.3      |
| SMc01803                                   | 1350259 | 1350746 | -              | 1350279   | 1350746  | Probable 30S ribosomal protein S9                   | 114.91  | 5.92     | 53.7     | 3.31     | 2.43     |
| SMc01804                                   | 1350749 | 1351318 | -              | 1350749   | 1351213  | Probable 50S ribosomal protein L13                  | 476.29  | 5.32     | 56.73    | 4.42     | 3.76     |
| SMc02310                                   | 682222  | 682559  | +              | 682276    | 682539   | Probable translation initiation factor IF-1 protein | 5.48    | 0.68     | 1.97     | 0.31     | 1.09     |
| SMc03770                                   | 3438825 | 3439379 | +              | 3438988   | 3439359  | Probable 50S ribosomal protein L21                  | 41.47   | 3.37     | 51.8     | 5.12     | 9        |
| SMc03772                                   | 3439361 | 3439682 | +              | 3439393   | 3439662  | Probable 50S ribosomal protein L27                  | 45.88   | 1.47     | 24.15    | 2.01     | 2.86     |
| SMc03859                                   | 3524375 | 3524788 | +              | 3524394   | 3524768  | Probable 30S ribosomal protein S16                  | 5.08    | 0.41     | 1.74     | 0.44     | 0.46     |
| SMc03863                                   | 3527112 | 3527814 | +              | 3527261   | 3527794  | Probable 50S ribosomal protein L19                  | 142.1   | 16.53    | 58.4     | 5.07     | 19.29    |
| SMc03881                                   | 3548580 | 3548884 | -              | 3548600   | 3548785  | Probable 50S ribosomal protein L32                  | 8.42    | 0.69     | 6.44     | 0.87     | 5.35     |
| SMc04320                                   | 2222629 | 2222885 | +              | 2222629   | 2222865  | 30S ribosomal protein S21                           | 6.37    | 1.01     | 6.58     | 0.07     | 2.3      |
| SMc04434                                   | 482666  | 482921  | -              | 482686    | 482820   | Probable 50S ribosomal protein L34                  | 47.75   | 4.3      | 51.99    | 6.67     | 110      |
| <b><i>Stress responses. Chaperones</i></b> |         |         |                |           |          |                                                     |         |          |          |          |          |
| SMa0124                                    | 66172   | 67826   | -              | 66192     | 67826    | 60 kDa chaperonin                                   | 6.34    | 2.5      | 5.35     | 0.17     | 0.23     |
| SMa1118                                    | 608662  | 609230  | +              | 608683    | 609210   | HspC2 heat shock protein                            | 508.78  | 2.82     | 67.02    | 19.75    | 2.27     |
| SMa2379                                    | 1342262 | 1344598 | -              | 1342282   | 1344465  | KatB catalase/peroxidase                            | 3.84    | 9.18     | 1.73     | 1.83     | 0.52     |
| SMB20007*                                  | 10127   | 12291   | +              | 10154     | 12271    | KatC                                                | 0.33    | 61.42    | 0.19     | 2.24     | 1.99     |
| SMB20054                                   | 63000   | 63910   | -              | 63020     | 63847    | chloride peroxidase                                 | 1.04    | 108.67   | 1.68     | 1.6      | 0.73     |
| SMB20227                                   | 232785  | 233417  | +              | 232839    | 233417   | NdiA1                                               | 0.41    | 49.14    | 0.09     | 1.47     | 4.93     |
| SMB20228                                   | 233410  | 233829  | +              | 233410    | 233829   | putative nutrient deprivation-induced protein       | 0.69    | 229.94   | 0.05     | 1.75     | 2.33     |
| SMB20229                                   | 233826  | 234820  | +              | 233826    | 234800   | NdiB                                                | 0.28    | 60.95    | 0.06     | 1.81     | 4.2      |
| SMB20964                                   | 1192333 | 1193041 | +              | 1192362   | 1193021  | peroxidase                                          | 2.6     | 18.75    | 0.97     | 2.44     | 2.35     |
| SMB21566                                   | 1104585 | 1106249 | -              | 1104605   | 1106233  | putative heat shock protein groEL                   | 9.79    | 0.57     | 0        | 1.42     | 0        |
| SMB22023                                   | 1106260 | 1106691 | -              | 1106280   | 1106594  | 10 kDa chaperonin                                   | 9.39    | 3.08     | 0        | 0.26     | 0        |
| SMc00040                                   | 1057488 | 1058020 | +              | 1057578   | 1058000  | Putative organic hydroperoxide resistance protein   | 2.21    | 33.53    | 0.21     | 1.36     | 0.54     |
| SMc00819                                   | 840208  | 841815  | +              | 840311    | 841795   | Catalase                                            | 0.92    | 45.41    | 0.25     | 3.83     | 0.36     |
| SMc00913                                   | 869135  | 870826  | -              | 869135    | 870772   | 60 KD chaperonin A                                  | 6.29    | 0.2      | 0.03     | 3.05     | 0.08     |
| SMc01106                                   | 448813  | 449320  | -              | 448833    | 449264   | Probable small heat shock protein                   | 6.71    | 0.83     | 0.07     | 0.39     | 0.11     |
| SMc01758                                   | 1303815 | 1305570 | -              | 1303835   | 1305463  | 60 KD chaperonin B (GroEL) protein                  | 2.53    | 61.23    | 0.17     | 0.63     | 0.44     |

Table S3.- Cont.

| CoIP-RNA <sup>2</sup>                                                  |         |         |                |           |          | Enrichment in CoIP-RNA                                              |         |          |          |          |          |
|------------------------------------------------------------------------|---------|---------|----------------|-----------|----------|---------------------------------------------------------------------|---------|----------|----------|----------|----------|
| Gene ID <sup>1</sup>                                                   | Start   | Stop    | S <sup>3</sup> | ORF start | ORF stop | Gene product                                                        | Hfq-log | Hfq-stat | Hfq-cold | Hfq-heat | Hfq-salt |
| <b>SMc02597*</b>                                                       | 1197360 | 1197928 | +              | 1197390   | 1197908  | Putative superoxide dismutase CU-ZN precursor transmembrane protein | 0.52    | 5.91     | 0.09     | 0.82     | 6.13     |
| <b>SMc02857</b>                                                        | 209659  | 211709  | +              | 209764    | 211689   | Heat shock protein 70 (HSP70) chaperone                             | 9.24    | 3.36     | 0.06     | 0.32     | 0.06     |
| <b>SMc03876</b>                                                        | 3541479 | 3542152 | -              | 3541499   | 3541930  | Heat shock protein 15 (HSP15).                                      | 1.33    | 0.14     | 5.82     | 0.43     | 0.93     |
| <b><u>Cell division. DNA replication, recombination and repair</u></b> |         |         |                |           |          |                                                                     |         |          |          |          |          |
| <b>SMb20008</b>                                                        | 12297   | 13384   | +              | 12297     | 13364    | DNA ligase (ATP)                                                    | 0.17    | 8.66     | 0.6      | 1.2      | 1.22     |
| <b>SMb20045</b>                                                        | 56536   | 57560   | -              | 56556     | 57560    | probable replication protein B                                      | 0.72    | 1.48     | 1.43     | 1.47     | 8.25     |
| <b>SMb20686</b>                                                        | 1489737 | 1490711 | +              | 1489827   | 1490711  | putative DNA ligase                                                 | 4.58    | 30.34    | 1.27     | 1.44     | 1.68     |
| <b>SMb21445</b>                                                        | 1373459 | 1374621 | -              | 1373479   | 1374621  | putative DNA topoisomerase I                                        | 0.28    | 10.74    | 0.18     | 1.46     | 6.09     |
| <b>SMb21448</b>                                                        | 1378691 | 1379406 | +              | 1378745   | 1379386  | putative DNA polymerase related protein                             | 0.92    | 32.02    | 0.47     | 2.44     | 5.07     |
| <b>SMb21522</b>                                                        | 1446088 | 1446371 | -              | 1446108   | 1446371  | putative cell division inhibitor protein                            | 0.69    | 5.41     | 2.07     | 0.17     | 1.65     |
| <b>SMb21523</b>                                                        | 1446368 | 1447183 | -              | 1446368   | 1447183  | putative cell division inhibitor protein                            | 2.3     | 13.03    | 2.44     | 0.16     | 1.72     |
| <b>SMb21524</b>                                                        | 1447261 | 1448047 | -              | 1447281   | 1448030  | putative cell division inhibitor protein                            | 5.06    | 7.01     | 3.5      | 0.27     | 3.14     |
| <b>SMc00299</b>                                                        | 1871586 | 1872394 | +              | 1871586   | 1872374  | Probable DNA repair protein                                         | 1.24    | 0.79     | 5.8      | 0.83     | 1.22     |
| <b>SMc00760</b>                                                        | 1948158 | 1949313 | -              | 1948178   | 1949263  | DNA strand exchange and recombination protein                       | 4.08    | 6.37     | 1.87     | 2.2      | 2.31     |
| <b>SMc01722</b>                                                        | 479457  | 480151  | -              | 479477    | 480130   | Hypothetical GTP-binding protein                                    | 2.52    | 1.38     | 7.84     | 0.75     | 2.36     |
| <b>SMc01874</b>                                                        | 2334374 | 2336220 | -              | 2334394   | 2336166  | Cell division protein                                               | 1.88    | 7.32     | 1.9      | 1.02     | 0.29     |
| <b>SMc02050</b>                                                        | 1668541 | 1670112 | +              | 1668617   | 1670092  | Probable trigger factor                                             | 7.93    | 0.37     | 4        | 0.25     | 0.82     |
| <b>SMc02566</b>                                                        | 55241   | 55935   | +              | 55295     | 55915    | Probable DNA repair system specific for alkylated DNA protein       | 1.69    | 11.02    | 1.47     | 0.7      | 1.61     |
| <b>SMc03246</b>                                                        | 3358510 | 3359808 | +              | 3358559   | 3359788  | Phage-related integrase                                             | 9.82    | 14.34    | 0.07     | 1.95     | 0.14     |
| <b>SMc03789</b>                                                        | 3455857 | 3457470 | -              | 3455857   | 3457470  | Putative DNA polymerase                                             | 0.64    | 1.96     | 1.71     | 3.4      | 7.7      |
| <b>SMc03959*</b>                                                       | 2951570 | 2954244 | +              | 2951627   | 2954224  | Probable ATP-dependent DNA ligase                                   | 0.44    | 18.26    | 0.24     | 3.53     | 2.76     |
| <b>SMc04187</b>                                                        | 2175636 | 2177155 | -              | 2175636   | 2177069  | DNA packaging protein GP2                                           | 0.64    | 3.27     | 0.51     | 2.43     | 8.74     |
| <b>SMc04296</b>                                                        | 2214096 | 2215210 | -              | 2214116   | 2215156  | Cell division protein ftsz                                          | 2.6     | 4.5      | 1.83     | 5.65     | 0.9      |
| <b>SMc05018</b>                                                        | 3417237 | 3419215 | -              | 3417257   | 3419215  | Putative DNA or RNA helicase                                        | 1.26    | 0.84     | 5.62     | 1.05     | 0.93     |
| <b><u>Other membrane and surface functions</u></b>                     |         |         |                |           |          |                                                                     |         |          |          |          |          |
| <b>SMA0669</b>                                                         | 356020  | 357269  | +              | 356020    | 357249   | HlyD-family protein                                                 | 2       | 0.13     | 8.4      | 1.5      | 1.52     |
| <b>SMA1303</b>                                                         | 712238  | 713410  | -              | 712238    | 713410   | VirB10-like transmembrane secretion protein                         | 1.52    | 1.26     | 1.14     | 6.6      | 0.97     |
| <b>SMA1313</b>                                                         | 716412  | 717133  | -              | 716432    | 717133   | VirB5 type IV secretion protein                                     | 0.52    | 1.77     | 0.09     | 8.32     | 0.67     |
| <b>SMA1319</b>                                                         | 719850  | 720149  | -              | 719850    | 720149   | VirB2 type IV secretion protein                                     | 2.07    | 4.72     | 0.07     | 6.18     | 0.27     |
| <b>SMA1905</b>                                                         | 1082691 | 1085171 | +              | 1082806   | 1085151  | MrcB penicillin binding protein B                                   | 3.39    | 1.32     | 5.04     | 0.67     | 1.2      |
| <b>SMb20775</b>                                                        | 1567264 | 1570887 | +              | 1567285   | 1570887  | hypothetical exported protein, TonB-dependent receptor protein      | 0.42    | 0.35     | 5.45     | 1.27     | 1.22     |
| <b>SMb20815</b>                                                        | 602766  | 604453  | -              | 602786    | 604453   | similar to protein involved in assembly of outer membrane proteins  | 5.35    | 3.37     | 3.73     | 3.01     | 2.48     |
| <b>SMb20831</b>                                                        | 622953  | 623980  | -              | 622973    | 623926   | RkpR                                                                | 5.65    | 13.3     | 5.44     | 2.69     | 6.55     |

Table S3.- Cont.

| CoIP-RNA <sup>2</sup> |         |         |                |           |          | Enrichment in CoIP-RNA                                                       |         |          |          |          |          |
|-----------------------|---------|---------|----------------|-----------|----------|------------------------------------------------------------------------------|---------|----------|----------|----------|----------|
| Gene ID <sup>1</sup>  | Start   | Stop    | S <sup>3</sup> | ORF start | ORF stop | Gene product                                                                 | Hfq-log | Hfq-stat | Hfq-cold | Hfq-heat | Hfq-salt |
| <b>SMb20946</b>       | 1172839 | 1173606 | -              | 1172859   | 1173539  | exopolysaccharide production protein                                         | 0.94    | 7.47     | 0.22     | 2.18     | 1.59     |
| <b>SMb21006</b>       | 1241039 | 1241288 | -              | 1241039   | 1241260  | hypothetical membrane protein                                                | 0.89    | 1.57     | 1.8      | 2        | 8.32     |
| <b>SMb21303</b>       | 885495  | 885943  | +              | 885495    | 885923   | hypothetical membrane-anchored protein                                       | 3.2     | 0.52     | 9.44     | 2.45     | 4.12     |
| <b>SMB21362</b>       | 1025607 | 1026131 | +              | 1025671   | 1026111  | hypothetical membrane-anchored protein                                       | 0.41    | 6.61     | 0.6      | 2        | 6.24     |
| <b>SMc00088</b>       | 1033159 | 1033646 | -              | 1033179   | 1033592  | Hypothetical/unknown transmembrane protein                                   | 7.33    | 0.52     | 8.19     | 0.47     | 0.39     |
| <b>SMc00130</b>       | 995679  | 995819  | +              | 995679    | 995819   | Hypothetical transmembrane protein                                           | 3.05    | 0.83     | 5.29     | 0.37     | 1.07     |
| <b>SMc00135</b>       | 2034596 | 2035401 | -              | 2034616   | 2035347  | Hypothetical transmembrane protein                                           | 21.05   | 10.63    | 3.82     | 19       | 2.36     |
| <b>SMc00250</b>       | 1820555 | 1820793 | +              | 1820609   | 1820773  | Hypothetical transmembrane protein                                           | 4.07    | 1.67     | 6.15     | 3.67     | 9.23     |
| <b>SMc00455</b>       | 1082618 | 1083421 | +              | 1082739   | 1083401  | Probable HlyIII                                                              | 0.63    | 11.77    | 1.12     | 1.59     | 2.91     |
| <b>SMc00506</b>       | 1905825 | 1906735 | -              | 1905845   | 1906654  | Hypothetical transmembrane protein                                           | 0.46    | 6.79     | 0.57     | 0.74     | 2.72     |
| <b>SMc00764</b>       | 775134  | 775404  | +              | 775244    | 775384   | Hypothetical/unknown transmembrane protein                                   | 0.86    | 8.96     | 0.48     | 2.51     | 4.28     |
| <b>SMc00796*</b>      | 817036  | 817245  | +              | 817061    | 817225   | Hypothetical transmembrane protein                                           | 0.31    | 8.27     | 0.03     | 2.27     | 2.19     |
| <b>SMc00799</b>       | 819127  | 819719  | -              | 819147    | 819719   | Hypothetical transmembrane protein                                           | 0.31    | 15.12    | 0.02     | 0.81     | 4.41     |
| <b>SMc00800*</b>      | 819810  | 820413  | -              | 819830    | 820273   | Hypothetical transmembrane protein                                           | 0.23    | 41.41    | 0.02     | 0.98     | 1.14     |
| <b>SMc00816</b>       | 837775  | 838211  | +              | 837775    | 838191   | Conserved hypothetical transmembrane protein                                 | 1.9     | 0.52     | 6.07     | 0.5      | 0.99     |
| <b>SMc00830</b>       | 851046  | 852366  | +              | 851078    | 852346   | Hypothetical transmembrane protein                                           | 0.81    | 0.03     | 6.48     | 0.36     | 0.33     |
| <b>SMc00885*</b>      | 900972  | 901788  | -              | 900992    | 901630   | Hypothetical transmembrane signal peptide protein                            | 0.28    | 27.36    | 0.02     | 1.19     | 1.91     |
| <b>SMc00971</b>       | 969964  | 970932  | -              | 969984    | 970907   | Probable pirin-related protein                                               | 3.15    | 5.92     | 1.94     | 0.9      | 2.16     |
| <b>SMc00990</b>       | 943588  | 944858  | -              | 943608    | 944804   | Putative fosmidomycin resistance antibiotic resistance transmembrane protein | 1.52    | 0.2      | 6.73     | 0.29     | 2        |
| <b>SMc01036*</b>      | 1562544 | 1562841 | +              | 1562570   | 1562821  | Hypothetical transmembrane protein                                           | 1.13    | 6.05     | 1        | 1.29     | 5.99     |
| <b>SMc01102</b>       | 454174  | 455399  | -              | 454194    | 455399   | Hypothetical transmembrane protein                                           | 0.57    | 0.29     | 0.52     | 1.16     | 6        |
| <b>SMc01264*</b>      | 1512504 | 1512993 | -              | 1512524   | 1512877  | Hypothetical transmembrane protein                                           | 0.56    | 5.41     | 0.18     | 1.01     | 1.99     |
| <b>SMc01274</b>       | 1501555 | 1501952 | -              | 1501575   | 1501952  | Protein CrcB homolog                                                         | 1.73    | 0.63     | 5.3      | 2        | 1.12     |
| <b>SMc01289</b>       | 1488535 | 1489929 | +              | 1488589   | 1489929  | Preprotein translocase subunit SecY                                          | 6.25    | 0.13     | 3.03     | 0.58     | 0.65     |
| <b>SMc01342</b>       | 1437469 | 1438302 | -              | 1437489   | 1438256  | Putative outer membrane protein                                              | 5.96    | 0.91     | 3.63     | 0.65     | 1.07     |
| <b>SMc01410</b>       | 2253125 | 2253418 | +              | 2253179   | 2253418  | Putative lipoprotein transmembrane                                           | 1.43    | 14.47    | 0.31     | 1.49     | 0.99     |
| <b>SMc01418</b>       | 2266664 | 2267089 | +              | 2266715   | 2267089  | hypothetical signal peptide protein                                          | 0.53    | 19.78    | 0.58     | 1.17     | 0.57     |
| <b>SMc01459</b>       | 2305422 | 2306297 | +              | 2305476   | 2306297  | Hypothetical transmembrane protein                                           | 0.66    | 7.14     | 0.47     | 1.83     | 0.32     |
| <b>SMc01488</b>       | 2247620 | 2248191 | -              | 2247640   | 2248137  | Hypothetical transmembrane protein                                           | 1.56    | 3.1      | 20.67    | 4        | 1        |
| <b>SMc01489</b>       | 2253436 | 2253809 | +              | 2253436   | 2253789  | hypothetical signal peptide protein                                          | 0.47    | 8.23     | 0.39     | 1.91     | 1.03     |
| <b>SMc01508</b>       | 2621064 | 2621515 | +              | 2621064   | 2621495  | Hypothetical transmembrane protein                                           | 0.58    | 27.56    | 0.02     | 0.67     | 2.13     |
| <b>SMc01509*</b>      | 2620514 | 2621036 | +              | 2620654   | 2621016  | Hypothetical transmembrane protein                                           | 0.47    | 63.74    | 0.01     | 1.12     | 3.65     |
| <b>SMc01519</b>       | 2612639 | 2613033 | +              | 2612639   | 2613013  | Hypothetical transmembrane protein                                           | 0.63    | 0.18     | 6.3      | 1.67     | 1.83     |



Table S3.- Cont.

| CoIP-RNA <sup>2</sup> |         |         |                |           |          | Enrichment in CoIP-RNA                                                  |         |          |          |          |          |
|-----------------------|---------|---------|----------------|-----------|----------|-------------------------------------------------------------------------|---------|----------|----------|----------|----------|
| Gene ID <sup>1</sup>  | Start   | Stop    | S <sup>3</sup> | ORF start | ORF stop | Gene product                                                            | Hfq-log | Hfq-stat | Hfq-cold | Hfq-heat | Hfq-salt |
| SMc01581              | 2517634 | 2517935 | +              | 2517634   | 2517915  | Hypothetical transmembrane protein                                      | 5.92    | 2.7      | 3.36     | 3        | 0.3      |
| SMc01714              | 490525  | 491138  | +              | 490630    | 491118   | Hypothetical transmembrane protein                                      | 1.78    | 28.35    | 2.55     | 2        | 2.55     |
| SMc01721              | 480462  | 482269  | -              | 480482    | 482269   | Putative inner-membrane transmembrane protein                           | 7.23    | 0.17     | 4.35     | 0.39     | 0.6      |
| SMc01723              | 478789  | 479402  | -              | 478809    | 479348   | Hypothetical transmembrane protein                                      | 6.22    | 11.29    | 2.77     | 1.04     | 1.77     |
| SMc01729              | 473140  | 474074  | +              | 473140    | 474054   | Hypothetical transmembrane protein                                      | 0.46    | 0.12     | 5.63     | 0.52     | 0.42     |
| SMc01776              | 1321935 | 1322520 | -              | 1321955   | 1322458  | Auxin-binding protein                                                   | 1.35    | 5.18     | 2.61     | 0.7      | 12.49    |
| SMc01794              | 1340713 | 1341320 | -              | 1340713   | 1341288  | Putative polysaccharide export system periplasmic transmembrane protein | 1.27    | 0.57     | 6.83     | 0.19     | 0.67     |
| SMc01907              | 1367837 | 1370105 | +              | 1367896   | 1370085  | Hypothetical transmembrane protein                                      | 1.04    | 0.79     | 5.47     | 1        | 1.37     |
| SMc01947              | 2669602 | 2669966 | -              | 2669622   | 2669966  | Conserved hypothetical transmembrane protein                            | 7.34    | 11.33    | 23.76    | 5.19     | 59.39    |
| SMc01986              | 2710607 | 2710986 | +              | 2710607   | 2710966  | Hypothetical transmembrane protein                                      | 1.15    | 66.15    | 1        | 2        | 1.42     |
| SMc02058              | 1659763 | 1660219 | +              | 1659867   | 1660199  | Probable YajC protein                                                   | 1.86    | 0.23     | 5.37     | 0.31     | 0.59     |
| SMc02066              | 1651446 | 1652154 | +              | 1651507   | 1652154  | Putative Sec-independent translocase transmembrane protein              | 2.25    | 0.52     | 5.54     | 1.48     | 0.53     |
| SMc02072              | 1644321 | 1647199 | +              | 1644342   | 1647179  | Hypothetical transmembrane protein                                      | 1.73    | 9.38     | 2.65     | 0.83     | 0.61     |
| SMc02156              | 539741  | 540615  | +              | 539798    | 540595   | Putative major antigenic peptide PEB                                    | 0.41    | 7.29     | 0.21     | 0.62     | 0.92     |
| SMc02200              | 545971  | 546552  | -              | 545971    | 546495   | Hypothetical transmembrane protein                                      | 1.58    | 6.75     | 0.74     | 1.81     | 4.12     |
| SMc02232              | 597475  | 598621  | +              | 597695    | 598621   | Hypothetical transmembrane protein                                      | 0.91    | 0.76     | 5.14     | 0.42     | 0.77     |
| SMc02234              | 598621  | 599444  | +              | 598621    | 599424   | Hypothetical transmembrane protein                                      | 1.01    | 1.1      | 5.35     | 0.73     | 0.83     |
| SMc02274              | 648247  | 649697  | +              | 648325    | 649677   | Capsule polysaccharide exporter                                         | 4.26    | 0.25     | 5.53     | 0.18     | 1.56     |
| SMc02401              | 1153162 | 1153684 | -              | 1153182   | 1153658  | Hypothetical transmembrane protein                                      | 0.36    | 4.59     | 0.42     | 11.65    | 2.4      |
| SMc02432              | 2812118 | 2814130 | +              | 2812170   | 2814110  | Hypothetical transmembrane protein                                      | 2.27    | 0.16     | 5.43     | 0.35     | 2.14     |
| SMc02446              | 2829202 | 2829449 | -              | 2829222   | 2829395  | Putative pilus assembly protein                                         | 2.26    | 5.04     | 7.8      | 0.67     | 0.3      |
| SMc02447              | 2829453 | 2829945 | -              | 2829473   | 2829793  | Conserved hypothetical transmembrane protein                            | 0.94    | 1.79     | 5.59     | 0.09     | 1.08     |
| SMc02571              | 1200492 | 1201814 | +              | 1200492   | 1201814  | Putative secretion membrane fusion protein                              | 2.18    | 1.65     | 13.95    | 3        | 3.5      |
| SMc02573              | 60108   | 60581   | -              | 60108     | 60581    | Hypothetical transmembrane protein                                      | 1.22    | 0.42     | 5.36     | 0.4      | 1.26     |
| SMc02617              | 110613  | 110774  | -              | 110613    | 110774   | Conserved hypothetical transmembrane protein                            | 4.15    | 281.12   | 0.6      | 2        | 2.43     |
| SMc02619              | 111180  | 111551  | -              | 111180    | 111497   | Conserved hypothetical transmembrane protein                            | 1.48    | 50.62    | 2.7      | 5        | 3.35     |
| SMc02638              | 1182547 | 1183053 | +              | 1182571   | 1183053  | Hypothetical transmembrane protein                                      | 1.62    | 9.24     | 0.37     | 2        | 3.86     |
| SMc02820              | 166109  | 167583  | +              | 166163    | 167563   | Putative pilus assembly protein                                         | 2.38    | 0.99     | 5.28     | 0.53     | 0.53     |
| SMc02853              | 203994  | 205223  | +              | 204256    | 205203   | Hypothetical transmembrane protein                                      | 4.91    | 1.04     | 10.22    | 3.42     | 4.28     |
| SMc02884              | 240001  | 241111  | -              | 240021    | 241013   | Probable membrane lipoprotein                                           | 3.44    | 1.68     | 6.92     | 2.87     | 1.88     |
| SMc02942              | 2946801 | 2947460 | -              | 2946821   | 2947351  | Peptidoglycan-associated lipoprotein                                    | 1.5     | 14.41    | 3.2      | 0.23     | 2.2      |
| SMc02989              | 3109282 | 3109514 | -              | 3109302   | 3109514  | Conserved hypothetical transmembrane protein                            | 7.65    | 0.65     | 4.26     | 0.29     | 0.35     |
| SMc03941              | 3092100 | 3092437 | -              | 3092120   | 3092344  | Conserved hypothetical transmembrane protein                            | 1.22    | 0.63     | 5.83     | 0.59     | 0.27     |

Table S3.- Cont.

| CoIP-RNA <sup>2</sup>        |         |         |                |           |          | Enrichment in CoIP-RNA             |         |          |          |          |          |
|------------------------------|---------|---------|----------------|-----------|----------|------------------------------------|---------|----------|----------|----------|----------|
| Gene ID <sup>1</sup>         | Start   | Stop    | S <sup>3</sup> | ORF start | ORF stop | Gene product                       | Hfq-log | Hfq-stat | Hfq-cold | Hfq-heat | Hfq-salt |
| <b>SMc04050</b>              | 3054414 | 3055207 | -              | 3054434   | 3055207  | Hypothetical transmembrane protein | 0.3     | 7.81     | 1.62     | 1.54     | 1.31     |
| <b>SMc04114</b>              | 160646  | 160913  | +              | 160711    | 160893   | Putative pilin subunit             | 18.48   | 22.39    | 10.52    | 0.54     | 5.34     |
| <b>SMc04182</b>              | 2172259 | 2172671 | -              | 2172279   | 2172617  | Hypothetical transmembrane protein | 1.13    | 3.87     | 1.35     | 1.5      | 7.91     |
| <b>SMc04183</b>              | 2172962 | 2173848 | -              | 2172982   | 2173794  | Hypothetical transmembrane protein | 1.46    | 6.67     | 4.95     | 3        | 60.72    |
| <b>SMc04184</b>              | 2174286 | 2174587 | -              | 2174306   | 2174533  | Hypothetical transmembrane protein | 1.04    | 3.94     | 1.5      | 2        | 9.13     |
| <b>SMc04189*</b>             | 2177556 | 2177853 | -              | 2177576   | 2177731  | Hypothetical transmembrane protein | 0.69    | 8.92     | 0.05     | 1.92     | 4.41     |
| <b>SMc04194*</b>             | 2181009 | 2181248 | +              | 2181031   | 2181228  | Putative transmembrane protein     | 0.49    | 8.32     | 0.06     | 1.64     | 1.72     |
| <b>SMc04248</b>              | 2073286 | 2073901 | +              | 2073326   | 2073901  | Hypothetical transmembrane protein | 6.57    | 1.57     | 6.92     | 0.75     | 2.61     |
| <b>Hfq operon</b>            |         |         |                |           |          |                                    |         |          |          |          |          |
| <b>SMc01048</b>              | 1577073 | 1577369 | +              | 1577127   | 1577369  | Probable RNA binding protein       | 17.78   | 1.85     | 15.17    | 2.97     | 6.1      |
| <b>SMc01049</b>              | 1577376 | 1578793 | +              | 1577376   | 1578773  | Putative GTP-binding protein       | 4.34    | 0.29     | 6.98     | 0.87     | 1.13     |
| <b>hypothetical proteins</b> |         |         |                |           |          |                                    |         |          |          |          |          |
| <b>SMA0RF11</b>              | 375058  | 375366  | -              | 375078    | 375335   | hypothetical protein               | 0.91    | 0.04     | 16.2     | 2.67     | 0.81     |
| <b>SMA0RF15</b>              | 699623  | 699793  | +              | 699638    | 699793   | hypothetical protein               | 9.36    | 0.11     | 24.6     | 4.5      | 0.76     |
| <b>SMA0RF16</b>              | 699810  | 700208  | +              | 699810    | 700208   | hypothetical protein               | 6.3     | 0.04     | 24.48    | 2.4      | 2.43     |
| <b>SMA0RF21</b>              | 1082421 | 1082652 | +              | 1082462   | 1082632  | hypothetical protein               | 3.39    | 5.88     | 8.2      | 1.11     | 4.87     |
| <b>SMA0RF7</b>               | 314177  | 314460  | -              | 314197    | 314442   | hypothetical protein               | 6.5     | 19.84    | 5.7      | 10       | 128.43   |
| <b>SMA0017</b>               | 11452   | 12083   | +              | 11506     | 12063    | hypothetical protein               | 1.52    | 0.81     | 6.2      | 1.67     | 1.52     |
| <b>SMA0121</b>               | 65471   | 65658   | -              | 65491     | 65658    | hypothetical protein               | 1.61    | 3.36     | 5.88     | 2.98     | 4.11     |
| <b>SMA0123</b>               | 65709   | 66166   | -              | 65729     | 66112    | hypothetical protein               | 4.15    | 3.54     | 9.74     | 0.38     | 0.46     |
| <b>SMA0134</b>               | 71046   | 71671   | -              | 71066     | 71671    | conserved hypothetical protein     | 1.12    | 147.11   | 0.01     | 3.19     | 1.23     |
| <b>SMA0136</b>               | 72217   | 74306   | +              | 72274     | 74286    | conserved hypothetical protein     | 0.37    | 5.7      | 0.43     | 0.55     | 2.6      |
| <b>SMA0164</b>               | 90721   | 91037   | +              | 90721     | 91017    | hypothetical protein               | 11.3    | 10.43    | 24.9     | 1.4      | 12.6     |
| <b>SMA0166</b>               | 91039   | 91589   | +              | 91039     | 91569    | conserved hypothetical protein     | 3.62    | 0.8      | 5.93     | 0.52     | 1.74     |
| <b>SMA0229</b>               | 127945  | 128527  | +              | 128085    | 128507   | conserved hypothetical protein     | 0.27    | 6.36     | 0.37     | 0.45     | 1.66     |
| <b>SMA0232</b>               | 128673  | 129298  | +              | 128727    | 129278   | conserved hypothetical protein     | 0.36    | 45.59    | 0.65     | 0.56     | 0.61     |
| <b>SMA0279</b>               | 156780  | 157465  | -              | 156800    | 157411   | conserved hypothetical protein     | 0.59    | 2.7      | 0.48     | 1.6      | 5.48     |
| <b>SMA0359</b>               | 193562  | 193807  | -              | 193562    | 193807   | conserved hypothetical protein     | 2.16    | 1.85     | 34.2     | 6        | 5.17     |
| <b>SMA0414</b>               | 224751  | 226495  | +              | 224805    | 226475   | conserved hypothetical protein     | 0.93    | 7.56     | 1.09     | 1.43     | 2.03     |
| <b>SMA0541*</b>              | 289805  | 290248  | +              | 289833    | 290228   | conserved hypothetical protein     | 0.83    | 89.3     | 0.03     | 2.03     | 1.93     |
| <b>SMA0543</b>               | 290313  | 290977  | +              | 290367    | 290957   | hypothetical protein               | 0.86    | 21.66    | 0.05     | 2.7      | 1.45     |
| <b>SMA0609</b>               | 325226  | 325801  | +              | 325226    | 325801   | hypothetical protein               | 10.37   | 4.72     | 1.95     | 4.5      | 1.22     |
| <b>SMA0610</b>               | 325807  | 326687  | +              | 325807    | 326667   | hypothetical protein               | 5.18    | 0.89     | 2.33     | 0.89     | 3.18     |

Table S3.- Cont.

| CoIP-RNA <sup>2</sup> |        |        |                |           |          | Enrichment in CoIP-RNA                        |         |          |          |          |          |
|-----------------------|--------|--------|----------------|-----------|----------|-----------------------------------------------|---------|----------|----------|----------|----------|
| Gene ID <sup>1</sup>  | Start  | Stop   | S <sup>3</sup> | ORF start | ORF stop | Gene product                                  | Hfq-log | Hfq-stat | Hfq-cold | Hfq-heat | Hfq-salt |
| <b>SMa0633</b>        | 340377 | 340876 | -              | 340397    | 340783   | hypothetical protein                          | 4.05    | 0.18     | 22.05    | 3        | 1.98     |
| <b>SMa0636</b>        | 341244 | 342172 | +              | 341499    | 342152   | conserved hypothetical protein                | 0.53    | 0.01     | 16.2     | 1        | 1.42     |
| <b>SMa0667</b>        | 355474 | 356016 | +              | 355528    | 356016   | conserved hypothetical protein                | 1.14    | 0.06     | 12.6     | 1.33     | 1.42     |
| <b>SMa0670</b>        | 357305 | 358233 | +              | 357359    | 358213   | conserved hypothetical protein                | 13.91   | 0.26     | 8.31     | 1.54     | 1.5      |
| <b>SMa0687</b>        | 371770 | 372399 | -              | 371790    | 372296   | hypothetical protein                          | 9.23    | 0.47     | 6.12     | 0.6      | 0.67     |
| <b>SMa0689</b>        | 372465 | 373435 | -              | 372485    | 373435   | conserved hypothetical protein                | 15.67   | 0.56     | 26.8     | 2.67     | 1.62     |
| <b>SMa0690</b>        | 373436 | 374889 | -              | 373456    | 374856   | conserved hypothetical protein                | 20.44   | 0.67     | 13.55    | 2        | 0.91     |
| <b>SMa0809</b>        | 442266 | 442987 | +              | 442329    | 442967   | hypothetical protein                          | 8.46    | 1.93     | 5.72     | 1        | 1.78     |
| <b>SMa0888</b>        | 495150 | 496014 | +              | 495196    | 496014   | conserved hypothetical protein                | 0.78    | 2.07     | 2.25     | 2        | 5.63     |
| <b>SMa0937</b>        | 520741 | 523052 | -              | 520761    | 522920   | conserved hypothetical protein                | 0.32    | 7.5      | 3.06     | 1.2      | 1.34     |
| <b>SMa0945</b>        | 528169 | 528764 | +              | 528169    | 528744   | conserved hypothetical protein                | 6.08    | 9.45     | 42.8     | 2.67     | 6.49     |
| <b>SMa1043</b>        | 573878 | 574182 | +              | 573878    | 574162   | conserved hypothetical protein                | 6.29    | 1.92     | 3.02     | 2.14     | 0.33     |
| <b>SMa1045</b>        | 574201 | 574542 | +              | 574255    | 574542   | hypothetical protein                          | 4.67    | 2.36     | 8        | 2        | 0.61     |
| <b>SMa1060</b>        | 579966 | 581353 | -              | 579986    | 581353   | conserved hypothetical protein                | 2.22    | 7.51     | 2.6      | 2.15     | 4.91     |
| <b>SMa1077</b>        | 588561 | 589103 | +              | 588601    | 589083   | Nex18 Symbiotically induced conserved protein | 5.83    | 12.37    | 1.34     | 2.51     | 1.46     |
| <b>SMa1082</b>        | 590330 | 591001 | -              | 590350    | 590970   | conserved hypothetical protein                | 1.99    | 0.02     | 53.85    | 7        | 1.98     |
| <b>SMa1086</b>        | 593600 | 594315 | -              | 593620    | 594294   | conserved hypothetical protein                | 3.21    | 0.02     | 17.4     | 6.4      | 1.34     |
| <b>SMa1089</b>        | 596594 | 596797 | +              | 596594    | 596797   | hypothetical protein                          | 4.06    | 0.41     | 5.83     | 1.14     | 0.26     |
| <b>SMa1091</b>        | 596794 | 597317 | +              | 596794    | 597297   | hypothetical protein                          | 1.96    | 0.13     | 10.95    | 2.5      | 2.13     |
| <b>SMa1093</b>        | 598230 | 598636 | +              | 598284    | 598616   | hypothetical protein                          | 11.92   | 0.79     | 5.47     | 1.25     | 0.91     |
| <b>SMa1095</b>        | 598750 | 599132 | +              | 598804    | 599112   | hypothetical protein                          | 9.51    | 1.11     | 7.5      | 2        | 1.22     |
| <b>SMa1132</b>        | 618385 | 618902 | +              | 618493    | 618882   | hypothetical protein                          | 1.12    | 0.03     | 7.62     | 1.8      | 0.43     |
| <b>SMa1146</b>        | 623712 | 626454 | +              | 623735    | 626434   | conserved hypothetical protein                | 1.36    | 0.02     | 8.07     | 2.22     | 2.1      |
| <b>SMa1147</b>        | 626479 | 627356 | +              | 626512    | 627336   | conserved hypothetical protein                | 1.25    | 0.03     | 8.14     | 1.71     | 0.7      |
| <b>SMa1149</b>        | 627414 | 628327 | +              | 627474    | 628307   | conserved hypothetical protein                | 5.9     | 0.07     | 27.48    | 5.6      | 1.7      |
| <b>SMa1153</b>        | 628931 | 629661 | +              | 628967    | 629641   | conserved hypothetical protein                | 2.54    | 0.02     | 20.2     | 6        | 1.83     |
| <b>SMa1154</b>        | 629707 | 630149 | +              | 629734    | 630129   | conserved hypothetical protein                | 7.18    | 0.21     | 2.77     | 1        | 1.75     |
| <b>SMa1169</b>        | 641608 | 642023 | +              | 641662    | 642003   | hypothetical protein                          | 0.66    | 0.02     | 14.8     | 2        | 2.43     |
| <b>SMa1176</b>        | 643856 | 644451 | -              | 643876    | 644394   | hypothetical protein                          | 1.15    | 0.16     | 7.27     | 2        | 4.53     |
| <b>SMa1200</b>        | 660498 | 661087 | -              | 660518    | 661033   | conserved hypothetical protein                | 5.07    | 0.37     | 14.2     | 1.33     | 2.43     |
| <b>SMa1201</b>        | 661232 | 661779 | -              | 661252    | 661632   | hypothetical protein                          | 0.74    | 0.05     | 12.3     | 4        | 2.13     |
| <b>SMa1231</b>        | 675099 | 675976 | +              | 675132    | 675956   | conserved hypothetical protein                | 2.7     | 0.68     | 6.87     | 1.5      | 1.88     |
| <b>SMa1256</b>        | 687697 | 688227 | -              | 687697    | 688227   | conserved hypothetical protein                | 5.3     | 0.52     | 1.04     | 1.64     | 0.5      |

Table S3.- Cont.

| CoIP-RNA <sup>2</sup> |         |         |                |           |          | Enrichment in CoIP-RNA            |         |          |          |          |          |
|-----------------------|---------|---------|----------------|-----------|----------|-----------------------------------|---------|----------|----------|----------|----------|
| Gene ID <sup>1</sup>  | Start   | Stop    | S <sup>3</sup> | ORF start | ORF stop | Gene product                      | Hfq-log | Hfq-stat | Hfq-cold | Hfq-heat | Hfq-salt |
| <b>SMa1259</b>        | 688231  | 689589  | -              | 688231    | 689589   | conserved hypothetical protein    | 3.09    | 0.24     | 6.17     | 0.86     | 2.61     |
| <b>SMa1501</b>        | 828335  | 829269  | -              | 828355    | 829269   | conserved hypothetical protein    | 1.31    | 5.77     | 0.49     | 2.87     | 0.3      |
| <b>SMa1503</b>        | 829280  | 830309  | -              | 829300    | 830166   | conserved hypothetical protein    | 1.64    | 5.97     | 0.1      | 1.32     | 0.13     |
| <b>SMa1507</b>        | 831222  | 832336  | +              | 831222    | 832316   | conserved hypothetical protein    | 12.55   | 6.34     | 0.78     | 12.21    | 0.23     |
| <b>SMa1697</b>        | 957048  | 957729  | -              | 957068    | 957667   | conserved hypothetical protein    | 10.57   | 2.09     | 4.79     | 0.94     | 1.58     |
| <b>SMa1750</b>        | 992835  | 994311  | +              | 992912    | 994291   | conserved hypothetical protein    | 1.49    | 9.27     | 1.23     | 1.97     | 4.71     |
| <b>SMa1765</b>        | 1003466 | 1003971 | -              | 1003486   | 1003971  | conserved hypothetical protein    | 0.66    | 9.03     | 0.48     | 1.95     | 1.78     |
| <b>SMa1793</b>        | 1016898 | 1017382 | +              | 1016940   | 1017362  | conserved hypothetical protein    | 1.75    | 15.63    | 0.51     | 3.71     | 6        |
| <b>SMa1835</b>        | 1041063 | 1042050 | -              | 1041083   | 1041973  | conserved hypothetical protein    | 1.14    | 9.45     | 2.4      | 1.71     | 2.52     |
| <b>SMa1918</b>        | 1092261 | 1092560 | +              | 1092279   | 1092560  | conserved hypothetical protein    | 1.9     | 12.6     | 0.4      | 1        | 1.37     |
| <b>SMa1927</b>        | 1095973 | 1097039 | +              | 1096027   | 1097019  | conserved hypothetical protein    | 2.35    | 6.45     | 1.56     | 0.46     | 2.16     |
| <b>SMa1957</b>        | 1112285 | 1113228 | +              | 1112318   | 1113208  | conserved hypothetical protein    | 1.94    | 0.63     | 0.33     | 5.4      | 0.7      |
| <b>SMa2011</b>        | 1138651 | 1138997 | +              | 1138651   | 1138977  | hypothetical protein              | 5.18    | 46.07    | 0.3      | 2.14     | 14.96    |
| <b>SMa2023</b>        | 1144189 | 1145041 | +              | 1144230   | 1145021  | Conservative hypothetical protein | 3.92    | 8.14     | 0        | 2.97     | 0.01     |
| <b>SMa2049</b>        | 1158381 | 1159631 | +              | 1158529   | 1159611  | conserved hypothetical protein    | 1.04    | 0.89     | 3.33     | 0.89     | 5.34     |
| <b>SMa2055</b>        | 1161154 | 1161479 | +              | 1161208   | 1161459  | hypothetical protein              | 5.66    | 0.86     | 3.15     | 1.5      | 0.3      |
| <b>SMa2061</b>        | 1162567 | 1164041 | +              | 1162596   | 1164041  | conserved hypothetical protein    | 0.61    | 5.28     | 0.1      | 1.19     | 2.13     |
| <b>SMa2071</b>        | 1168535 | 1168800 | -              | 1168555   | 1168746  | conserved hypothetical protein    | 0.52    | 83.27    | 0.05     | 3.71     | 3.83     |
| <b>SMa2129</b>        | 1203271 | 1204455 | -              | 1203291   | 1204310  | conserved hypothetical protein    | 2.14    | 2.05     | 10.26    | 2        | 8.46     |
| <b>SMa2201</b>        | 1232872 | 1233316 | -              | 1232892   | 1233272  | conserved hypothetical protein    | 3.26    | 1.35     | 2.8      | 2        | 6.49     |
| <b>SMa2221</b>        | 1243528 | 1244241 | +              | 1243528   | 1244241  | conserved hypothetical protein    | 2.59    | 3.54     | 0.6      | 8.5      | 0.23     |
| <b>SMa2229</b>        | 1248057 | 1248616 | -              | 1248077   | 1248562  | conserved hypothetical protein    | 2.44    | 3.61     | 2.77     | 3.5      | 5.33     |
| <b>SMa2239</b>        | 1254231 | 1255058 | +              | 1254259   | 1255038  | conserved hypothetical protein    | 6.7     | 2.6      | 5.88     | 1.89     | 1.91     |
| <b>SMa2241</b>        | 1255074 | 1256341 | +              | 1255074   | 1256321  | conserved hypothetical protein    | 8.64    | 3.46     | 13.83    | 2.78     | 3.69     |
| <b>SMa2243</b>        | 1256319 | 1257338 | -              | 1256339   | 1257265  | conserved hypothetical protein    | 6.43    | 0.85     | 6        | 1.19     | 0.72     |
| <b>SMa2315</b>        | 1291230 | 1291817 | +              | 1291278   | 1291817  | hypothetical protein              | 2.38    | 7.09     | 0.88     | 5.85     | 2.11     |
| <b>SMa2361</b>        | 1331739 | 1332750 | +              | 1331764   | 1332750  | conserved hypothetical protein    | 7.65    | 4.9      | 2.5      | 1.87     | 1.59     |
| <b>SMa5002</b>        | 71692   | 72109   | -              | 71712     | 72026    | conserved hypothetical protein    | 1.04    | 238.6    | 0.04     | 4.52     | 2        |
| <b>SMa5019</b>        | 204395  | 204993  | +              | 204550    | 204993   | conserved hypothetical protein    | 0.32    | 0.73     | 0.6      | 1.6      | 5.23     |
| <b>SMa5034</b>        | 1339039 | 1339781 | +              | 1339095   | 1339781  | conserved hypothetical protein    | 0.87    | 1.22     | 5.4      | 2.18     | 2.27     |
| <b>SMbORF12</b>       | 1115785 | 1116277 | +              | 1115934   | 1116257  | hypothetical protein              | 0.27    | 34.29    | 0.05     | 1.85     | 1.05     |
| <b>SMbORF15</b>       | 1380844 | 1381226 | -              | 1380864   | 1381079  | hypothetical protein              | 0.54    | 82.07    | 0.14     | 1.23     | 14       |
| <b>SMbORF18</b>       | 1581755 | 1581882 | -              | 1581755   | 1581859  | hypothetical protein              | 0.83    | 1.89     | 4.2      | 2        | 22.83    |

Table S3.- Cont.

| CoIP-RNA <sup>2</sup> |        |        |                |           |          | Enrichment in CoIP-RNA           |         |          |          |          |          |
|-----------------------|--------|--------|----------------|-----------|----------|----------------------------------|---------|----------|----------|----------|----------|
| Gene ID <sup>1</sup>  | Start  | Stop   | S <sup>3</sup> | ORF start | ORF stop | Gene product                     | Hfq-log | Hfq-stat | Hfq-cold | Hfq-heat | Hfq-salt |
| <b>SMBORF6</b>        | 575694 | 576029 | -              | 575714    | 575896   | hypothetical protein             | 0.55    | 22.13    | 0.18     | 2.31     | 1.52     |
| <b>SMBORF8</b>        | 585229 | 586183 | +              | 585318    | 586163   | hypothetical protein             | 1.56    | 0.55     | 5.36     | 0.82     | 1.15     |
| <b>SMB20025</b>       | 36075  | 37144  | +              | 36147     | 37124    | conserved hypothetical protein   | 0.54    | 8.54     | 0.36     | 0.67     | 5.64     |
| <b>SMB20026</b>       | 37267  | 37792  | +              | 37331     | 37792    | conserved hypothetical protein   | 4.9     | 15.46    | 3.87     | 1.33     | 25.63    |
| <b>SMB20041</b>       | 51626  | 52253  | +              | 51703     | 52233    | hypothetical protein             | 0.3     | 22.78    | 0.07     | 1.22     | 2.76     |
| <b>SMB20063</b>       | 72756  | 73072  | +              | 72756     | 73052    | conserved hypothetical protein   | 1       | 7.56     | 1.03     | 1.62     | 0.58     |
| <b>SMB20065*</b>      | 73929  | 74390  | +              | 73972     | 74370    | hypothetical protein             | 0.33    | 32.33    | 0.04     | 1.75     | 1.99     |
| <b>SMB20066</b>       | 74483  | 74742  | +              | 74537     | 74722    | hypothetical protein             | 1.66    | 126.62   | 0.12     | 2.4      | 3.26     |
| <b>SMB20074</b>       | 83357  | 83646  | +              | 83384     | 83626    | hypothetical protein             | 0.52    | 32.78    | 0.03     | 1.5      | 6.36     |
| <b>SMB20075</b>       | 83675  | 83886  | +              | 83675     | 83866    | hypothetical protein             | 2.07    | 236.24   | 0.05     | 0.67     | 2.33     |
| <b>SMB20081</b>       | 92715  | 93445  | -              | 92735     | 93445    | conserved hypothetical protein   | 0.32    | 12.96    | 0.3      | 1.55     | 1.22     |
| <b>SMB20082</b>       | 93442  | 94399  | -              | 93442     | 94344    | hypothetical protein             | 0.26    | 31.3     | 0.09     | 3.2      | 2.47     |
| <b>SMB20083*</b>      | 94443  | 94811  | +              | 94552     | 94791    | hypothetical protein             | 0.64    | 20.53    | 0.45     | 3.83     | 17.2     |
| <b>SMB20163</b>       | 180811 | 181980 | +              | 180811    | 181980   | conserved hypothetical protein   | 1.04    | 2.81     | 7        | 2        | 2.23     |
| <b>SMB20167</b>       | 185402 | 186288 | -              | 185422    | 186234   | hypothetical protein             | 1.56    | 6.6      | 0.62     | 1.25     | 1.52     |
| <b>SMB20180</b>       | 197742 | 198241 | +              | 197742    | 198221   | hypothetical protein             | 4.69    | 6.57     | 20.1     | 14       | 28.91    |
| <b>SMB20236</b>       | 241677 | 242095 | +              | 241731    | 242075   | hypothetical protein             | 0.65    | 15.67    | 0.6      | 4        | 0.87     |
| <b>SMB20240</b>       | 244260 | 245378 | -              | 244260    | 245378   | conserved hypothetical protein   | 0.32    | 10.9     | 0.6      | 3.6      | 15.58    |
| <b>SMB20241</b>       | 245375 | 246460 | -              | 245375    | 246460   | conserved hypothetical protein   | 0.28    | 15.12    | 0.11     | 0.94     | 1.65     |
| <b>SMB20242</b>       | 246457 | 247587 | -              | 246457    | 247587   | conserved hypothetical protein   | 0.69    | 17.32    | 0.1      | 1.33     | 3.65     |
| <b>SMB20250</b>       | 256338 | 256957 | +              | 256338    | 256937   | conserved hypothetical protein   | 0.57    | 12.89    | 0.16     | 1.45     | 5.81     |
| <b>SMB20251</b>       | 257005 | 257991 | +              | 257009    | 257971   | hypothetical protein             | 0.52    | 28.35    | 0.13     | 1.57     | 9.96     |
| <b>SMB20254*</b>      | 260389 | 260704 | -              | 260409    | 260684   | hypothetical protein             | 1.18    | 6.07     | 0.6      | 10       | 9.74     |
| <b>SMB20255*</b>      | 260739 | 261354 | -              | 260759    | 261310   | hypothetical protein             | 1.91    | 18.9     | 0.51     | 3.14     | 6.78     |
| <b>SMB20269</b>       | 273692 | 275403 | +              | 273692    | 275383   | conserved hypothetical protein   | 0.76    | 0.07     | 5.82     | 0.5      | 0.46     |
| <b>SMB20273</b>       | 278639 | 278865 | -              | 278659    | 278844   | hypothetical protein             | 0.41    | 2.16     | 0.18     | 1.84     | 5.3      |
| <b>SMB20292</b>       | 299388 | 300533 | -              | 299408    | 300391   | hypothetical immunogenic protein | 6.02    | 3.6      | 3.81     | 4.71     | 3.89     |
| <b>SMB20293*</b>      | 300570 | 301082 | +              | 300703    | 301062   | hypothetical protein             | 0.28    | 7.24     | 0.1      | 1.33     | 6.15     |
| <b>SMB20340*</b>      | 345295 | 345548 | +              | 345349    | 345528   | hypothetical protein             | 5.39    | 205.05   | 0.64     | 2.12     | 4.15     |
| <b>SMB20341</b>       | 345679 | 345938 | +              | 345733    | 345918   | hypothetical protein             | 2.49    | 40.63    | 0.48     | 1.6      | 5.36     |
| <b>SMB20454*</b>      | 466799 | 467273 | +              | 466834    | 467253   | conserved hypothetical protein   | 0.32    | 21.08    | 0.02     | 3.1      | 2.14     |
| <b>SMB20475</b>       | 487989 | 488532 | -              | 487989    | 488483   | conserved hypothetical protein   | 0.84    | 24.32    | 0.9      | 2        | 6.09     |
| <b>SMB20534</b>       | 557533 | 558362 | -              | 557553    | 558362   | hypothetical protein             | 2.07    | 1.42     | 1.44     | 1.2      | 5.48     |

Table S3.- Cont.

| CoIP-RNA <sup>2</sup> |         |         |                |           |          | Enrichment in CoIP-RNA                       |         |          |          |          |          |
|-----------------------|---------|---------|----------------|-----------|----------|----------------------------------------------|---------|----------|----------|----------|----------|
| Gene ID <sup>1</sup>  | Start   | Stop    | S <sup>3</sup> | ORF start | ORF stop | Gene product                                 | Hfq-log | Hfq-stat | Hfq-cold | Hfq-heat | Hfq-salt |
| Smb20607              | 1621026 | 1621490 | -              | 1621026   | 1621490  | conserved hypothetical protein               | 1.09    | 3.6      | 2.1      | 1        | 5.02     |
| Smb20614              | 1631490 | 1633571 | -              | 1631510   | 1633528  | hypothetical protein                         | 1.7     | 0.09     | 5.53     | 0.16     | 0.72     |
| Smb20647              | 1448307 | 1448693 | -              | 1448327   | 1448578  | hypothetical protein                         | 1.25    | 9.55     | 0.4      | 0.13     | 2.07     |
| Smb20675              | 1477146 | 1477741 | -              | 1477166   | 1477741  | conserved hypothetical protein               | 12.74   | 4.72     | 2.77     | 2        | 0.42     |
| Smb20724              | 1529171 | 1530169 | +              | 1529225   | 1530169  | conserved hypothetical exported protein      | 4.4     | 11.17    | 1.51     | 0.29     | 1.72     |
| Smb20771              | 1563532 | 1564592 | -              | 1563552   | 1564538  | conserved hypothetical protein               | 2.26    | 1.29     | 2.35     | 1.82     | 5.59     |
| Smb20835              | 627105  | 628120  | -              | 627125    | 628120   | conserved hypothetical protein               | 4.48    | 1.36     | 5.75     | 2.1      | 4.84     |
| Smb20886              | 1291425 | 1292871 | +              | 1291462   | 1292871  | conserved hypothetical protein               | 2.86    | 1.42     | 4.47     | 2.56     | 8.5      |
| Smb20889              | 1294728 | 1295518 | -              | 1294748   | 1295452  | hypothetical glycine-rich protein            | 1.89    | 20.19    | 0.38     | 1.7      | 1.71     |
| Smb20897              | 1305414 | 1305886 | +              | 1305414   | 1305866  | hypothetical protein                         | 2.37    | 2.7      | 0.9      | 1.5      | 5.93     |
| Smb20907              | 1317258 | 1317583 | +              | 1317258   | 1317563  | hypothetical protein                         | 1.15    | 2.89     | 7.8      | 2        | 4.46     |
| Smb20908*             | 1317768 | 1318151 | -              | 1317788   | 1318126  | hypothetical protein                         | 0.46    | 7.35     | 1.11     | 2.86     | 7.22     |
| Smb21013              | 636603  | 637129  | -              | 636623    | 637090   | hypothetical protein                         | 3.2     | 2.86     | 5.45     | 2.15     | 2.81     |
| Smb21030              | 650627  | 651096  | -              | 650647    | 651096   | hypothetical protein                         | 10.02   | 38.59    | 3.12     | 4.4      | 4.14     |
| Smb21161              | 905250  | 906703  | +              | 905250    | 906683   | conserved hypothetical protein               | 1.18    | 0.63     | 5.52     | 4        | 1.22     |
| Smb21253              | 823674  | 824464  | +              | 823674    | 824444   | hypothetical protein                         | 2.95    | 1.15     | 8.62     | 0.75     | 0.61     |
| Smb21332*             | 999469  | 1000089 | +              | 999572    | 1000069  | hypothetical protein                         | 1.04    | 29.53    | 0.12     | 0.62     | 2.08     |
| Smb21334              | 1000578 | 1001413 | +              | 1000632   | 1001393  | hypothetical exported glutamine-rich protein | 0.41    | 23.94    | 0.14     | 2        | 7.07     |
| Smb21399              | 1330848 | 1331272 | -              | 1330868   | 1331272  | hypothetical protein                         | 3.73    | 1.89     | 1        | 2        | 9.33     |
| Smb21402              | 1332640 | 1333952 | +              | 1332769   | 1333932  | hypothetical calcium binding protein         | 2.45    | 0.4      | 7.7      | 0.76     | 1.57     |
| Smb21403              | 1335187 | 1335833 | +              | 1335358   | 1335813  | hypothetical protein                         | 3.52    | 8.42     | 8.8      | 4.67     | 13.8     |
| Smb21407              | 1338042 | 1338880 | +              | 1338042   | 1338860  | conserved hypothetical protein               | 0.52    | 49.61    | 0.21     | 2.12     | 5.3      |
| Smb21440              | 1369931 | 1370513 | +              | 1370059   | 1370493  | hypothetical protein                         | 1.61    | 10.28    | 1.48     | 2.17     | 5.63     |
| Smb21441              | 1371025 | 1371485 | -              | 1371045   | 1371485  | conserved hypothetical protein               | 0.54    | 86.45    | 0.03     | 2.8      | 1.24     |
| Smb21442              | 1371498 | 1371947 | -              | 1371498   | 1371947  | hypothetical protein                         | 0.2     | 147.39   | 0.01     | 4.78     | 3.54     |
| Smb21443              | 1371979 | 1372367 | -              | 1371999   | 1372313  | hypothetical protein                         | 0.38    | 87.62    | 0.14     | 2        | 4.98     |
| Smb21444*             | 1372300 | 1373094 | +              | 1372331   | 1373074  | hypothetical protein                         | 1.45    | 101.58   | 0.26     | 3        | 22.43    |
| Smb21450              | 1380254 | 1380867 | +              | 1380308   | 1380847  | conserved hypothetical protein               | 1.04    | 27.17    | 0.38     | 1.45     | 2.27     |
| Smb21452*             | 1381205 | 1381576 | +              | 1381221   | 1381556  | putative chaperone                           | 0.44    | 51.3     | 0.24     | 1.47     | 5.15     |
| Smb21454              | 1381803 | 1382137 | -              | 1381823   | 1382137  | hypothetical protein                         | 0.75    | 22.55    | 0.18     | 1.7      | 2.18     |
| Smb21456              | 1383771 | 1384280 | -              | 1383791   | 1384228  | hypothetical protein                         | 0.57    | 17.21    | 0.74     | 2.88     | 0.85     |
| Smb21470              | 1397681 | 1398016 | +              | 1397735   | 1398016  | hypothetical protein                         | 0.65    | 1.77     | 0.6      | 6.55     | 5.31     |
| Smb21471              | 1397994 | 1398262 | +              | 1397994   | 1398242  | hypothetical protein                         | 0.46    | 15.75    | 0.17     | 0.95     | 0.58     |

Table S3.- Cont.

| CoIP-RNA <sup>2</sup> |         |         |                |           |          | Enrichment in CoIP-RNA              |         |          |          |          |          |
|-----------------------|---------|---------|----------------|-----------|----------|-------------------------------------|---------|----------|----------|----------|----------|
| Gene ID <sup>1</sup>  | Start   | Stop    | S <sup>3</sup> | ORF start | ORF stop | Gene product                        | Hfq-log | Hfq-stat | Hfq-cold | Hfq-heat | Hfq-salt |
| <b>SMb21473</b>       | 1398866 | 1399300 | +              | 1398866   | 1399300  | conserved hypothetical protein      | 0.52    | 48.82    | 0.06     | 1.86     | 5.65     |
| <b>SMb21480</b>       | 1403354 | 1403634 | -              | 1403374   | 1403634  | conserved hypothetical protein      | 0.41    | 46.3     | 0.04     | 0.82     | 2.56     |
| <b>SMb21481</b>       | 1403628 | 1404158 | -              | 1403628   | 1404104  | conserved hypothetical protein      | 0.5     | 74.94    | 0.02     | 0.82     | 2.35     |
| <b>SMb21482</b>       | 1404381 | 1404757 | -              | 1404401   | 1404703  | hypothetical protein                | 1.3     | 23.03    | 0.09     | 1.16     | 2.34     |
| <b>SMb21483*</b>      | 1404776 | 1405077 | -              | 1404796   | 1405077  | hypothetical protein                | 0.11    | 29.44    | 0.06     | 2.12     | 3.56     |
| <b>SMb21485</b>       | 1406188 | 1406702 | +              | 1406242   | 1406682  | hypothetical protein                | 0.22    | 0.75     | 0.3      | 1.8      | 5.11     |
| <b>SMb21544</b>       | 1078366 | 1078838 | +              | 1078420   | 1078818  | hypothetical exported protein       | 1.89    | 12.46    | 1.2      | 2.18     | 2.93     |
| <b>SMb21573</b>       | 1111973 | 1113030 | +              | 1112027   | 1113010  | hypothetical exported protein       | 2.24    | 8.13     | 0.21     | 1.23     | 2.21     |
| <b>SMb21630</b>       | 1657730 | 1658991 | -              | 1657750   | 1658991  | conserved hypothetical protein      | 23.64   | 0.92     | 8.31     | 0.98     | 1.14     |
| <b>SMb21668</b>       | 1026223 | 1026499 | +              | 1026252   | 1026479  | hypothetical protein                | 2.07    | 10.39    | 1.54     | 1.14     | 8.35     |
| <b>SMb21681</b>       | 1318311 | 1318603 | +              | 1318407   | 1318583  | hypothetical protein                | 2.71    | 32.29    | 1.13     | 1.73     | 4.54     |
| <b>SMb21682</b>       | 1321481 | 1321686 | +              | 1321481   | 1321666  | hypothetical protein                | 2.49    | 1.89     | 1.2      | 2        | 9.33     |
| <b>SMb21683</b>       | 1331288 | 1331593 | -              | 1331308   | 1331481  | hypothetical protein                | 4.09    | 37.6     | 0.96     | 17.33    | 62.78    |
| <b>SMb21687</b>       | 1405905 | 1406119 | +              | 1405905   | 1406099  | hypothetical protein                | 0.83    | 27.4     | 0.21     | 1.5      | 6.36     |
| <b>SMb21696</b>       | 672636  | 673517  | +              | 672636    | 673517   | hypothetical protein                | 0.59    | 2.7      | 1        | 5.33     | 8.72     |
| <b>SMcORF14</b>       | 1718937 | 1719188 | -              | 1718957   | 1719088  | hypothetical protein                | 0.73    | 12.13    | 0.14     | 0.97     | 0.88     |
| <b>SMcORF17</b>       | 1769008 | 1769310 | +              | 1769051   | 1769290  | hypothetical protein                | 1.02    | 6.23     | 2.8      | 1.46     | 0.84     |
| <b>SMcORF19</b>       | 1923643 | 1923905 | +              | 1923643   | 1923885  | hypothetical protein                | 7.37    | 15.22    | 3.14     | 3.69     | 1.57     |
| <b>SMcORF22</b>       | 2695440 | 2695699 | -              | 2695460   | 2695609  | hypothetical protein                | 2.8     | 0.3      | 10.32    | 1.35     | 5.32     |
| <b>SMcORF23</b>       | 2916649 | 2916955 | -              | 2916669   | 2916929  | hypothetical protein                | 0.69    | 12.6     | 0.24     | 5.06     | 3.54     |
| <b>SMcORF7</b>        | 1104180 | 1104372 | -              | 1104200   | 1104340  | hypothetical protein                | 1.2     | 22.71    | 0.76     | 0.3      | 0.09     |
| <b>SMc00003</b>       | 985149  | 986308  | +              | 985233    | 986288   | Putative chaperone protein          | 3.11    | 14.95    | 4.11     | 0.57     | 1.39     |
| <b>SMc00048</b>       | 1081587 | 1082083 | +              | 1081641   | 1082063  | conserved hypothetical protein      | 3.15    | 6.58     | 0.73     | 1.27     | 1.12     |
| <b>SMc00049</b>       | 1082124 | 1082488 | +              | 1082124   | 1082468  | hypothetical protein                | 4.51    | 9.45     | 0.46     | 0.86     | 1.07     |
| <b>SMc00063</b>       | 1098804 | 1099144 | +              | 1098840   | 1099124  | hypothetical protein                | 0.85    | 43.6     | 0.11     | 1.47     | 2.9      |
| <b>SMc00079</b>       | 1012751 | 1013520 | -              | 1012771   | 1013466  | conserved hypothetical protein      | 4.38    | 0.07     | 6        | 0.84     | 2.42     |
| <b>SMc00134</b>       | 2035528 | 2036433 | +              | 2035586   | 2036413  | conserved hypothetical protein      | 3.08    | 0.61     | 6.55     | 1.33     | 2.43     |
| <b>SMc00141</b>       | 2027950 | 2029985 | -              | 2027970   | 2029985  | hypothetical protein                | 6.32    | 27.97    | 1.15     | 2.94     | 3.88     |
| <b>SMc00198</b>       | 2030030 | 2030296 | -              | 2030050   | 2030202  | hypothetical/unknown protein        | 3.05    | 28.63    | 0.79     | 2.4      | 2.95     |
| <b>SMc00242</b>       | 1808963 | 1810116 | -              | 1808983   | 1810116  | hypothetical signal peptide protein | 24.63   | 12.3     | 6.15     | 2.05     | 3.83     |
| <b>SMc00252</b>       | 1821842 | 1822181 | -              | 1821862   | 1822161  | hypothetical protein                | 0.24    | 7.15     | 0.22     | 0.93     | 1.46     |
| <b>SMc00254</b>       | 1823652 | 1824133 | +              | 1823706   | 1824113  | conserved hypothetical protein      | 2.07    | 1278.87  | 0.22     | 4        | 75.48    |
| <b>SMc00255</b>       | 1824443 | 1824768 | +              | 1824443   | 1824748  | hypothetical protein                | 1.51    | 7.73     | 3.36     | 1.33     | 1.91     |

Table S3.- Cont.

| CoIP-RNA <sup>2</sup> |         |         |                |           |          | Enrichment in CoIP-RNA                        |         |          |          |          |          |
|-----------------------|---------|---------|----------------|-----------|----------|-----------------------------------------------|---------|----------|----------|----------|----------|
| Gene ID <sup>1</sup>  | Start   | Stop    | S <sup>3</sup> | ORF start | ORF stop | Gene product                                  | Hfq-log | Hfq-stat | Hfq-cold | Hfq-heat | Hfq-salt |
| SMc00276              | 1845653 | 1846548 | -              | 1845673   | 1846548  | conserved hypothetical protein                | 5.1     | 1.09     | 3.33     | 2        | 0.95     |
| SMc00291              | 1860437 | 1861966 | +              | 1860627   | 1861946  | conserved hypothetical protein                | 1.23    | 1.08     | 5.71     | 0.48     | 3.39     |
| SMc00336              | 291247  | 292873  | -              | 291267    | 292847   | hypothetical protein                          | 1.05    | 1.96     | 5.22     | 0.24     | 1.07     |
| SMc00338              | 293363  | 293910  | -              | 293383    | 293910   | conserved hypothetical protein                | 1.45    | 10.63    | 0.99     | 2.06     | 0.37     |
| SMc00360              | 315744  | 316492  | -              | 315764    | 316384   | conserved hypothetical protein                | 9.64    | 3.65     | 5.16     | 5.99     | 7.67     |
| SMc00367              | 323138  | 323599  | -              | 323158    | 323517   | conserved hypothetical protein                | 0.59    | 5.4      | 0.02     | 0.9      | 0.04     |
| SMc00371*             | 325747  | 326297  | -              | 325767    | 326258   | conserved hypothetical protein                | 1.07    | 182.72   | 0.03     | 4.84     | 2.53     |
| SMc00400              | 349912  | 351059  | -              | 349932    | 351059   | hypothetical signal peptide protein           | 2.21    | 0.94     | 2.22     | 1        | 12.23    |
| SMc00402              | 352638  | 353993  | -              | 352658    | 353938   | hypothetical signal peptide protein           | 1.39    | 0.94     | 1.24     | 0.16     | 5.29     |
| SMc00431              | 379419  | 379897  | -              | 379439    | 379843   | conserved hypothetical protein                | 0.83    | 1.89     | 0.75     | 1.5      | 5.33     |
| SMc00472              | 1950626 | 1951647 | +              | 1950695   | 1951627  | conserved hypothetical protein                | 5.07    | 0.37     | 4.62     | 0.13     | 0.53     |
| SMc00487              | 1923344 | 1923635 | +              | 1923402   | 1923635  | conserved hypothetical protein                | 4.97    | 5.84     | 2.69     | 6.43     | 6.84     |
| SMc00496              | 1915242 | 1915698 | -              | 1915262   | 1915576  | hypothetical protein                          | 2.67    | 4.84     | 5.26     | 1.38     | 1.66     |
| SMc00521              | 1893346 | 1893773 | +              | 1893346   | 1893753  | conserved hypothetical protein                | 3.03    | 0.55     | 5.15     | 0.32     | 1.24     |
| SMc00591              | 1263519 | 1263875 | +              | 1263574   | 1263855  | Hypothetical/unknown signal peptide protein   | 9.07    | 8.71     | 0.44     | 8.69     | 0.3      |
| SMc00596              | 1268581 | 1269104 | -              | 1268601   | 1269104  | conserved hypothetical protein                | 6.22    | 4.13     | 1.5      | 2        | 12.58    |
| SMc00651              | 2924671 | 2925419 | +              | 2924797   | 2925399  | hypothetical protein                          | 1.26    | 14.17    | 3.25     | 0.63     | 1.12     |
| SMc00665*             | 2914461 | 2914689 | -              | 2914481   | 2914669  | hypothetical/unknown protein                  | 0.32    | 13.81    | 0.07     | 2.67     | 7.3      |
| SMc00689              | 2888418 | 2889988 | +              | 2888546   | 2889988  | hypothetical protein signal peptide           | 3.13    | 6.83     | 2.03     | 2.03     | 1.14     |
| SMc00705              | 2874211 | 2875081 | -              | 2874231   | 2875034  | Conserved hypothetical signal peptide protein | 2.3     | 5.64     | 0.98     | 1.67     | 0.56     |
| SMc00767              | 779609  | 779974  | -              | 779629    | 779868   | hypothetical protein                          | 2.59    | 278.76   | 0.6      | 1        | 2.43     |
| SMc00777              | 797279  | 797795  | +              | 797329    | 797775   | conserved hypothetical protein                | 14.47   | 0.13     | 0.02     | 0.17     | 0.1      |
| SMc00795*             | 816082  | 816374  | -              | 816102    | 816350   | conserved hypothetical protein                | 0.57    | 94.82    | 0.03     | 4.57     | 1.78     |
| SMc00798              | 818820  | 819142  | +              | 818874    | 819122   | conserved hypothetical protein                | 0.58    | 13.08    | 0.48     | 0.28     | 2.95     |
| SMc00814              | 834994  | 836041  | +              | 835041    | 836021   | hypothetical signal peptide protein           | 1.87    | 14.17    | 0.21     | 1.03     | 1.9      |
| SMc00823              | 843911  | 844326  | +              | 843911    | 844306   | hypothetical protein                          | 2.28    | 7.09     | 0.4      | 2.12     | 1.56     |
| SMc00850              | 937447  | 937985  | +              | 937447    | 937965   | conserved hypothetical protein                | 1.27    | 0.13     | 5.6      | 0.27     | 0.93     |
| SMc00866              | 920371  | 921587  | -              | 920391    | 921548   | hypothetical protein                          | 0.86    | 0.97     | 1.77     | 1.68     | 10.8     |
| SMc00895              | 888006  | 888297  | +              | 888041    | 888277   | conserved hypothetical protein                | 11.16   | 1.12     | 7.31     | 2.05     | 6.39     |
| SMc00902              | 881183  | 881763  | +              | 881183    | 881743   | conserved hypothetical protein                | 1.94    | 0.21     | 5.25     | 1        | 1.01     |
| SMc00939              | 1767976 | 1768491 | -              | 1767996   | 1768385  | conserved hypothetical protein                | 1.81    | 6.5      | 2.31     | 3.54     | 2.48     |
| SMc00940*             | 1768571 | 1768920 | -              | 1768591   | 1768842  | hypothetical protein                          | 2.37    | 121.49   | 0.13     | 2.44     | 3.92     |
| SMc00942              | 1769621 | 1770017 | -              | 1769641   | 1769883  | conserved hypothetical protein                | 4.3     | 8.92     | 2.88     | 1.67     | 2.92     |



Table S3.- Cont.

| CoIP-RNA <sup>2</sup> |         |         |                |           |          | Enrichment in CoIP-RNA              |         |          |          |          |          |
|-----------------------|---------|---------|----------------|-----------|----------|-------------------------------------|---------|----------|----------|----------|----------|
| Gene ID <sup>1</sup>  | Start   | Stop    | S <sup>3</sup> | ORF start | ORF stop | Gene product                        | Hfq-log | Hfq-stat | Hfq-cold | Hfq-heat | Hfq-salt |
| <b>SMc00959*</b>      | 1785806 | 1786124 | +              | 1785948   | 1786124  | hypothetical/unknown protein        | 1.75    | 8.21     | 0.83     | 2.78     | 3.55     |
| <b>SMc00987</b>       | 947998  | 948652  | -              | 948018    | 948584   | conserved hypothetical protein      | 3.26    | 8.94     | 10.2     | 0.53     | 2.34     |
| <b>SMc01002</b>       | 1529012 | 1529514 | +              | 1529066   | 1529494  | conserved hypothetical protein      | 1.7     | 7.56     | 0.64     | 1.58     | 0.5      |
| <b>SMc01016</b>       | 1541086 | 1541587 | -              | 1541106   | 1541537  | hypothetical protein                | 1.67    | 7.61     | 0.85     | 2.31     | 0.79     |
| <b>SMc01029</b>       | 1555406 | 1555830 | +              | 1555529   | 1555810  | conserved hypothetical protein      | 2.09    | 6.41     | 11.85    | 2.4      | 7.22     |
| <b>SMc01051</b>       | 1581592 | 1582445 | -              | 1581612   | 1582445  | conserved hypothetical protein      | 3.11    | 0.75     | 5.92     | 1        | 1.22     |
| <b>SMc01068</b>       | 1521785 | 1522128 | -              | 1521805   | 1522074  | hypothetical/unknown protein        | 2.34    | 5.43     | 6.9      | 1        | 2.33     |
| <b>SMc01091</b>       | 467531  | 467748  | -              | 467551    | 467694   | hypothetical protein                | 7.26    | 2.36     | 6.09     | 0.57     | 0.61     |
| <b>SMc01107</b>       | 448507  | 448829  | -              | 448527    | 448784   | conserved hypothetical protein      | 2.35    | 7.6      | 1.28     | 1.09     | 0.42     |
| <b>SMc01159*</b>      | 391073  | 391978  | +              | 391073    | 391978   | hypothetical protein                | 3.3     | 9.93     | 1.16     | 2.27     | 1.12     |
| <b>SMc01265</b>       | 1510718 | 1512265 | +              | 1510718   | 1512265  | conserved hypothetical protein      | 0.86    | 26.62    | 0.34     | 2.75     | 2.76     |
| <b>SMc01266</b>       | 1509389 | 1510705 | +              | 1509389   | 1510705  | conserved hypothetical protein      | 0.45    | 29.96    | 0.19     | 1.26     | 1.62     |
| <b>SMc01267*</b>      | 1507355 | 1509384 | +              | 1507415   | 1509364  | conserved hypothetical protein      | 1.11    | 68.46    | 0.26     | 1.67     | 1.47     |
| <b>SMc01277</b>       | 1499081 | 1499886 | -              | 1499101   | 1499886  | hypothetical protein                | 1.42    | 0.63     | 6.85     | 1        | 1.42     |
| <b>SMc01325</b>       | 1458322 | 1459160 | +              | 1458475   | 1459140  | hypothetical/unknown protein        | 0.24    | 0.21     | 0.91     | 0.48     | 5.71     |
| <b>SMc01349</b>       | 1432697 | 1433214 | +              | 1432697   | 1433194  | conserved hypothetical protein      | 1.53    | 0.17     | 5.08     | 0.67     | 1.06     |
| <b>SMc01445</b>       | 2289052 | 2289290 | -              | 2289072   | 2289290  | hypothetical protein                | 3.2     | 50.25    | 0.35     | 3.75     | 7.41     |
| <b>SMc01446</b>       | 2289323 | 2289585 | -              | 2289343   | 2289585  | hypothetical protein                | 2.76    | 46.2     | 0.34     | 5.37     | 8.37     |
| <b>SMc01456</b>       | 2300337 | 2300807 | +              | 2300353   | 2300787  | hypothetical protein                | 1.39    | 6.71     | 1.22     | 1.33     | 3.36     |
| <b>SMc01467*</b>      | 2314631 | 2315123 | -              | 2314651   | 2315040  | conserved hypothetical protein      | 0.35    | 15.49    | 0.04     | 1.37     | 2.59     |
| <b>SMc01514</b>       | 2615641 | 2616173 | -              | 2615661   | 2616095  | conserved hypothetical protein      | 7.11    | 36.45    | 0.47     | 0.17     | 31.4     |
| <b>SMc01515</b>       | 2614674 | 2615620 | -              | 2614694   | 2615620  | hypothetical protein signal peptide | 2.95    | 5.3      | 0.27     | 0.37     | 16.8     |
| <b>SMc01541</b>       | 2476579 | 2477780 | -              | 2476599   | 2477780  | conserved hypothetical protein      | 1.78    | 1.35     | 10.2     | 1.33     | 1.62     |
| <b>SMc01542</b>       | 2477790 | 2478025 | -              | 2477810   | 2478025  | hypothetical protein                | 3.07    | 0.41     | 13.05    | 2.5      | 4.87     |
| <b>SMc01545</b>       | 2481516 | 2481934 | -              | 2481536   | 2481880  | hypothetical protein                | 1.56    | 1.18     | 7.68     | 2        | 2.68     |
| <b>SMc01549</b>       | 2488524 | 2489192 | -              | 2488544   | 2489170  | hypothetical protein peptide signal | 0.82    | 5.1      | 0.76     | 2.18     | 1.33     |
| <b>SMc01550</b>       | 2490159 | 2490672 | +              | 2490185   | 2490652  | conserved hypothetical protein      | 2.52    | 1.85     | 8.33     | 1.18     | 1.43     |
| <b>SMc01557</b>       | 2498282 | 2498699 | -              | 2498302   | 2498658  | hypothetical signal peptide protein | 1.16    | 12.44    | 0.3      | 1.88     | 0.98     |
| <b>SMc01559</b>       | 2499408 | 2499930 | -              | 2499428   | 2499850  | conserved hypothetical protein      | 1.48    | 10.91    | 1.53     | 1.11     | 0.88     |
| <b>SMc01590*</b>      | 2522953 | 2523623 | +              | 2522971   | 2523603  | hypothetical protein                | 0.15    | 21.23    | 0.02     | 1.98     | 3.25     |
| <b>SMc01602</b>       | 2393048 | 2393979 | +              | 2393081   | 2393959  | conserved hypothetical protein      | 2.41    | 13.49    | 4.93     | 10.47    | 20.09    |
| <b>SMc01617</b>       | 2407430 | 2408275 | -              | 2407430   | 2408275  | conserved hypothetical protein      | 0.46    | 0.19     | 11.4     | 4        | 4.57     |
| <b>SMc01701</b>       | 510966  | 511597  | -              | 510986    | 511570   | conserved hypothetical protein      | 0.65    | 0.26     | 6.18     | 0.8      | 1.03     |

Table S3.- Cont.

| CoIP-RNA <sup>2</sup> |         |         |                |           |          | Enrichment in CoIP-RNA         |         |          |          |          |          |
|-----------------------|---------|---------|----------------|-----------|----------|--------------------------------|---------|----------|----------|----------|----------|
| Gene ID <sup>1</sup>  | Start   | Stop    | S <sup>3</sup> | ORF start | ORF stop | Gene product                   | Hfq-log | Hfq-stat | Hfq-cold | Hfq-heat | Hfq-salt |
| SMc01703              | 509437  | 509888  | -              | 509457    | 509888   | conserved hypothetical protein | 0.1     | 0.14     | 16       | 8        | 3.86     |
| SMc01748              | 2613082 | 2613396 | +              | 2613136   | 2613396  | hypothetical protein           | 0.77    | 1.05     | 7.2      | 1.25     | 1.07     |
| SMc01759              | 1305576 | 1305846 | -              | 1305596   | 1305814  | conserved hypothetical protein | 0.56    | 5.63     | 0.02     | 0.75     | 0.06     |
| SMc01788              | 1332481 | 1332736 | -              | 1332501   | 1332716  | hypothetical protein           | 0.98    | 221.09   | 2        | 6.11     | 17.69    |
| SMc01910              | 1372292 | 1375773 | +              | 1372292   | 1375753  | hypothetical protein           | 1.28    | 0.12     | 5.57     | 0.14     | 0.81     |
| SMc01911              | 1375788 | 1376260 | +              | 1375842   | 1376240  | conserved hypothetical protein | 3.16    | 8.1      | 3.63     | 1.3      | 0.79     |
| SMc01929              | 1394904 | 1396591 | +              | 1394904   | 1396571  | hypothetical protein           | 2.84    | 0.26     | 5.07     | 0.2      | 0.2      |
| SMc01930              | 1396630 | 1397054 | +              | 1396630   | 1397034  | hypothetical protein           | 1.28    | 0.55     | 9.37     | 0.5      | 0.46     |
| SMc01995              | 2659618 | 2660086 | +              | 2659700   | 2660086  | conserved hypothetical protein | 12.44   | 2.51     | 1.08     | 2.22     | 0.9      |
| SMc02090              | 1619046 | 1619933 | +              | 1619046   | 1619933  | conserved hypothetical protein | 1.44    | 0.51     | 7.1      | 0.42     | 0.71     |
| SMc02153              | 555359  | 556690  | -              | 555359    | 556690   | conserved hypothetical protein | 1.2     | 0.16     | 5.59     | 0.63     | 0.96     |
| SMc02154              | 551813  | 554713  | -              | 551813    | 554713   | hypothetical protein           | 1.73    | 0.1      | 5.27     | 0.51     | 0.63     |
| SMc02155              | 548950  | 551798  | -              | 548970    | 551798   | hypothetical protein           | 2.3     | 0.31     | 5.18     | 0.49     | 0.57     |
| SMc02173              | 521858  | 522306  | -              | 521878    | 522306   | conserved hypothetical protein | 1.04    | 8.66     | 0.26     | 1.43     | 7.3      |
| SMc02202              | 542113  | 542975  | +              | 542113    | 542955   | hypothetical protein           | 8.05    | 10.39    | 0.91     | 2.41     | 1.43     |
| SMc02203              | 547672  | 548831  | +              | 547672    | 548811   | conserved hypothetical protein | 7.31    | 4.68     | 4.82     | 5.38     | 1.73     |
| SMc02226              | 587292  | 587829  | +              | 587336    | 587809   | conserved hypothetical protein | 0.75    | 1.72     | 0.8      | 1        | 6.7      |
| SMc02277              | 652153  | 652411  | +              | 652179    | 652391   | hypothetical/unknown protein   | 1.78    | 7.48     | 5.2      | 1.3      | 0.78     |
| SMc02312              | 683262  | 683494  | +              | 683262    | 683474   | conserved hypothetical protein | 3.07    | 12.31    | 3.66     | 0.46     | 5.34     |
| SMc02313              | 684818  | 685302  | -              | 684838    | 685302   | hypothetical protein           | 5.68    | 2.74     | 0.05     | 0.36     | 0.08     |
| SMc02319              | 689827  | 690035  | -              | 689847    | 690035   | hypothetical/unknown protein   | 6.22    | 2.07     | 0.9      | 0.78     | 1.39     |
| SMc02354              | 2775866 | 2776733 | +              | 2775918   | 2776733  | conserved hypothetical protein | 0.69    | 1.57     | 2.45     | 5.69     | 0.94     |
| SMc02392              | 1145047 | 1145517 | +              | 1145231   | 1145497  | hypothetical protein           | 7.93    | 28.56    | 51.98    | 1.56     | 26.73    |
| SMc02405              | 1157064 | 1157563 | +              | 1157064   | 1157543  | conserved hypothetical protein | 8.37    | 0.65     | 10.8     | 1.52     | 4.67     |
| SMc02407              | 1162858 | 1163549 | -              | 1162858   | 1163436  | conserved hypothetical protein | 2.66    | 5.39     | 2.4      | 1.33     | 2.11     |
| SMc02434              | 2817118 | 2817914 | -              | 2817138   | 2817782  | hypothetical protein           | 48.26   | 4.9      | 30.92    | 1.78     | 4.86     |
| SMc02441              | 2825670 | 2826118 | -              | 2825690   | 2826118  | conserved hypothetical protein | 6.03    | 2.53     | 1.32     | 3.45     | 2.56     |
| SMc02552*             | 1208625 | 1208841 | -              | 1208645   | 1208794  | hypothetical/unknown protein   | 47.36   | 3.27     | 2.8      | 5.09     | 7.8      |
| SMc02556              | 1206297 | 1206678 | -              | 1206297   | 1206566  | conserved hypothetical protein | 1.96    | 8        | 0.93     | 1.13     | 2.02     |
| SMc02564              | 54694   | 55210   | +              | 54717     | 55190    | conserved hypothetical protein | 1.54    | 9.4      | 2.67     | 1.02     | 2.08     |
| SMc02589              | 79804   | 81084   | -              | 79804     | 81030    | conserved hypothetical protein | 0.94    | 1.5      | 4.07     | 0.44     | 5.68     |
| SMc02642              | 1179035 | 1179564 | +              | 1179230   | 1179544  | hypothetical protein           | 2.9     | 5.08     | 0.3      | 2.94     | 5.05     |
| SMc02656              | 1167314 | 1167512 | +              | 1167340   | 1167492  | hypothetical/unknown protein   | 6.87    | 0.56     | 0.05     | 3.89     | 0.22     |

Table S3.- Cont.

| CoIP-RNA <sup>2</sup> |         |         |                |           |          | Enrichment in CoIP-RNA              |         |          |          |          |          |
|-----------------------|---------|---------|----------------|-----------|----------|-------------------------------------|---------|----------|----------|----------|----------|
| Gene ID <sup>1</sup>  | Start   | Stop    | S <sup>3</sup> | ORF start | ORF stop | Gene product                        | Hfq-log | Hfq-stat | Hfq-cold | Hfq-heat | Hfq-salt |
| SMc02699              | 2547792 | 2548042 | +              | 2547837   | 2548022  | conserved hypothetical protein      | 0.48    | 10.93    | 0.57     | 1.05     | 3.27     |
| SMc02727              | 2578361 | 2579421 | +              | 2578415   | 2579401  | hypothetical protein                | 0.55    | 6.93     | 0.27     | 1.45     | 3.15     |
| SMc02732              | 2585353 | 2585805 | -              | 2585373   | 2585777  | conserved hypothetical protein      | 3.49    | 1.1      | 8.13     | 1.63     | 2.73     |
| SMc02803              | 3643515 | 3644060 | +              | 3643515   | 3644060  | conserved hypothetical protein      | 1.39    | 0.46     | 6.75     | 0.78     | 1.76     |
| SMc02845              | 194399  | 194883  | +              | 194438    | 194863   | Putative resistance protein         | 1.14    | 0.94     | 0.09     | 0.49     | 9.61     |
| SMc02847              | 196034  | 196422  | +              | 196034    | 196402   | hypothetical protein                | 3.18    | 0.63     | 2.92     | 0.67     | 5.6      |
| SMc02848              | 196549  | 197265  | -              | 196569    | 197240   | conserved hypothetical protein      | 1.04    | 5.8      | 3.04     | 0.2      | 1.08     |
| SMc02860              | 214165  | 214858  | -              | 214165    | 214800   | hypothetical protein                | 2.91    | 4.09     | 2.19     | 2.69     | 9.88     |
| SMc02906              | 262066  | 262456  | +              | 262113    | 262436   | conserved hypothetical protein      | 7.35    | 2.15     | 2.55     | 3.31     | 2.49     |
| SMc03066              | 764395  | 764863  | +              | 764433    | 764843   | conserved hypothetical protein      | 2.57    | 0.14     | 5.81     | 0.16     | 0.32     |
| SMc03093              | 3255763 | 3256388 | -              | 3255783   | 3256262  | conserved hypothetical protein      | 1.18    | 1.1      | 0.4      | 0.73     | 7.53     |
| SMc03149              | 3178489 | 3179114 | +              | 3178543   | 3179094  | hypothetical protein                | 3.06    | 2.25     | 8.83     | 1.43     | 2.09     |
| SMc03151              | 3109511 | 3110232 | -              | 3109511   | 3110209  | conserved hypothetical protein      | 8.61    | 0.42     | 1.21     | 0.57     | 0.33     |
| SMc03249              | 3362726 | 3363037 | -              | 3362726   | 3362983  | hypothetical protein                | 4.15    | 6.3      | 10.8     | 6        | 3.96     |
| SMc03251              | 3364872 | 3365953 | -              | 3364892   | 3365899  | hypothetical protein                | 2.76    | 0.1      | 5.47     | 3.25     | 1.14     |
| SMc03288              | 3405993 | 3406387 | +              | 3406047   | 3406367  | hypothetical/unknown protein        | 4.15    | 1.05     | 9.2      | 3.33     | 3.45     |
| SMc03289              | 3406781 | 3407037 | -              | 3406801   | 3406983  | hypothetical/unknown protein        | 0.8     | 13.81    | 0.3      | 0.33     | 1.67     |
| SMc03766              | 3431997 | 3432818 | -              | 3431997   | 3432764  | hypothetical protein                | 14.52   | 1.32     | 11.15    | 4.14     | 2.37     |
| SMc03787              | 3451917 | 3452260 | -              | 3451917   | 3452228  | hypothetical protein                | 0.47    | 0.29     | 0.4      | 0.73     | 6.05     |
| SMc03790              | 3457313 | 3458298 | -              | 3457313   | 3458266  | conserved hypothetical protein      | 1.92    | 1.55     | 0.83     | 2.19     | 5.6      |
| SMc03844              | 3509082 | 3509580 | -              | 3509102   | 3509512  | conserved hypothetical protein      | 1.27    | 6.89     | 1.04     | 2.22     | 1.8      |
| SMc03852              | 3516889 | 3517502 | -              | 3516909   | 3517502  | hypothetical protein signal peptide | 0.54    | 0.34     | 8.1      | 3.25     | 2.51     |
| SMc03956              | 2948979 | 2950069 | -              | 2948999   | 2950069  | hypothetical signal peptide protein | 5.14    | 4.46     | 6.16     | 2.53     | 1.65     |
| SMc03988              | 2986144 | 2986352 | +              | 2986144   | 2986332  | hypothetical protein                | 20.38   | 10.07    | 42.4     | 14.67    | 22.72    |
| SMc04000              | 2996764 | 2997122 | +              | 2996919   | 2997122  | hypothetical protein                | 10.02   | 2.46     | 12.42    | 1.83     | 4.64     |
| SMc04010              | 3003664 | 3005650 | -              | 3003684   | 3005501  | hypothetical protein                | 3.8     | 5.91     | 2.96     | 2.17     | 8.73     |
| SMc04043              | 3046813 | 3047832 | -              | 3046833   | 3047714  | conserved hypothetical protein      | 3       | 4.72     | 2.84     | 5.84     | 6.41     |
| SMc04046              | 3051050 | 3051558 | -              | 3051070   | 3051474  | conserved hypothetical protein      | 3.11    | 8.17     | 0.35     | 4.29     | 1.17     |
| SMc04053*             | 3056365 | 3056982 | +              | 3056489   | 3056962  | hypothetical protein                | 1.54    | 9.01     | 1.18     | 9.64     | 15.36    |
| SMc04150              | 116592  | 117706  | +              | 116646    | 117686   | conserved hypothetical protein      | 0.8     | 38.52    | 1.92     | 0.8      | 2.31     |
| SMc04152              | 114969  | 115574  | +              | 114969    | 115574   | hypothetical protein                | 1.56    | 26.58    | 0.9      | 1.5      | 1.22     |
| SMc04161              | 2151304 | 2151794 | -              | 2151324   | 2151794  | conserved hypothetical protein      | 1.36    | 6.54     | 0.93     | 0.7      | 1.25     |
| SMc04164              | 2153577 | 2153920 | +              | 2153700   | 2153900  | hypothetical protein                | 8.29    | 59.95    | 10.7     | 4.43     | 15.42    |

Table S3.- Cont.

| CoIP-RNA <sup>2</sup> |         |         |                |           |          | Enrichment in CoIP-RNA              |         |          |          |          |          |
|-----------------------|---------|---------|----------------|-----------|----------|-------------------------------------|---------|----------|----------|----------|----------|
| Gene ID <sup>1</sup>  | Start   | Stop    | S <sup>3</sup> | ORF start | ORF stop | Gene product                        | Hfq-log | Hfq-stat | Hfq-cold | Hfq-heat | Hfq-salt |
| <b>SMc04177</b>       | 2168048 | 2168544 | -              | 2168068   | 2168529  | hypothetical protein                | 1.75    | 1.99     | 8.55     | 3        | 5.63     |
| <b>SMc04188</b>       | 2177171 | 2177570 | +              | 2177209   | 2177550  | conserved hypothetical protein      | 5.04    | 6.07     | 0.67     | 1        | 0.84     |
| <b>SMc04191</b>       | 2178659 | 2179099 | -              | 2178679   | 2179041  | hypothetical protein                | 3.11    | 2.83     | 0.9      | 0.67     | 15.42    |
| <b>SMc04216</b>       | 2044278 | 2044527 | +              | 2044306   | 2044527  | hypothetical protein                | 0.25    | 9.9      | 0.13     | 0.76     | 0.34     |
| <b>SMc04238*</b>      | 2064679 | 2065059 | +              | 2064803   | 2065039  | conserved hypothetical protein      | 0.81    | 5.74     | 0.36     | 0.64     | 1.67     |
| <b>SMc04239</b>       | 2065407 | 2065712 | +              | 2065483   | 2065692  | hypothetical protein                | 24.6    | 21.17    | 5.07     | 4.19     | 3.06     |
| <b>SMc04261</b>       | 2090616 | 2091031 | -              | 2090636   | 2091031  | hypothetical protein                | 2.06    | 0.28     | 6.76     | 0.73     | 2.6      |
| <b>SMc04298*</b>      | 2215328 | 2215596 | +              | 2215382   | 2215576  | hypothetical protein                | 1.1     | 78.79    | 0.5      | 11.19    | 5.93     |
| <b>SMc04299*</b>      | 2215594 | 2217387 | -              | 2215614   | 2217326  | hypothetical protein                | 1.04    | 12.43    | 0.45     | 1.79     | 1.18     |
| <b>SMc04324</b>       | 2227042 | 2227451 | -              | 2227062   | 2227451  | hypothetical protein                | 4.08    | 3.99     | 5.4      | 1.11     | 4.13     |
| <b>SMc04329</b>       | 2138186 | 2138964 | -              | 2138206   | 2138910  | hypothetical protein                | 5.36    | 1.1      | 1.12     | 0.5      | 0.68     |
| <b>SMc05001</b>       | 242774  | 243118  | -              | 242774    | 243064   | hypothetical protein                | 0.59    | 1.35     | 2.7      | 2        | 10.96    |
| <b>SMc05008</b>       | 2312846 | 2313374 | -              | 2312866   | 2313225  | hypothetical signal peptide protein | 4.75    | 28.79    | 4.98     | 5.59     | 21.82    |
| <b>VBISMc0802</b>     | 662774  | 663307  | +              | 662922    | 663287   | hypothetical protein                | 5.01    | 0.72     | 9.93     | 1.33     | 2.91     |
| <b>VBISMc1000</b>     | 815544  | 816023  | +              | 815598    | 816023   | hypothetical protein                | 1.06    | 0.46     | 5.1      | 0.43     | 4.35     |
| <b>VBISMc1492</b>     | 1208828 | 1209144 | -              | 1208848   | 1209090  | hypothetical protein                | 35.6    | 5.51     | 7.4      | 11.33    | 22.72    |
| <b>VBISMc2174</b>     | 1728061 | 1728376 | -              | 1728081   | 1728221  | hypothetical protein                | 1.05    | 1.12     | 1.06     | 1.27     | 6.01     |

<sup>1</sup>Genes belonging to the Hfq regulon (extracted from the literature) are shaded. Genes of the RpoE2 regulon are in red and the asterisk indicates those with RpoE2 promoter signatures.

Genes depending on the Sin/ExpR quorum sensing system are in green. Genes belonging to both regulons are underlined.

<sup>2</sup>Coordinates of cDNA clusters according to the MTU model and the annotation of the *S. meliloti* 1021 genome

<sup>3</sup>S, coding strand

PSBP, Periplasmic Solute-Binding Protein

**Table S4.** Bacterial strains and plasmids

| Strain/Plasmid                | Relevant characteristics                                                                                                                                                                                                                                        | Reference             |
|-------------------------------|-----------------------------------------------------------------------------------------------------------------------------------------------------------------------------------------------------------------------------------------------------------------|-----------------------|
| <b>Bacteria</b>               |                                                                                                                                                                                                                                                                 |                       |
| <i>S. meliloti</i>            |                                                                                                                                                                                                                                                                 |                       |
| <b>Sm2B3001</b>               | <i>expR</i> <sup>+</sup> Sm2011 derivative; Nal <sup>r</sup> Sm <sup>r</sup>                                                                                                                                                                                    | 76                    |
| <b>SmpWsin<sup>FLAG</sup></b> | Sm2B3001 derivative expressing FLAG-tagged SinI                                                                                                                                                                                                                 | This work             |
| <b>Smhfq<sup>FLAG</sup></b>   | Sm2B3001 derivative expressing FLAG-tagged Hfq                                                                                                                                                                                                                  | This work             |
| <b>SmΔhfq</b>                 | Sm2B3001 Δ <i>hfq</i> derivative                                                                                                                                                                                                                                | This work             |
| <b>1021ΔR1/2</b>              | AbcR1/2 double deletion mutant; Er <sup>r</sup> , Sm <sup>r</sup>                                                                                                                                                                                               | 42                    |
| <i>E. coli</i>                |                                                                                                                                                                                                                                                                 |                       |
| <b>DH5α</b>                   | F <sup>-</sup> , ø80d <i>lacZ</i> ΔM15, Δ( <i>lacZYA-argF</i> )U169, <i>deoR</i> , <i>recA1</i> , <i>endA1</i> , <i>hsdR17</i> (rK <sup>-</sup> , mK <sup>+</sup> ), <i>phoA</i> , <i>supE44</i> , λ <sup>-</sup> , <i>thi-1</i> , <i>gyrA96</i> , <i>relA1</i> | Bethesda Research Lab |
| <b>HB101</b>                  | <i>supE44</i> , Δ( <i>mcrC-mrr</i> ), <i>recA13</i> , <i>ara-14</i> , <i>proA2</i> , <i>lacY1</i> , <i>galK2</i> , <i>rpsL20</i> , <i>xyt-5</i> , <i>mtl-1</i> , <i>leuB6</i> , <i>thi-1</i>                                                                    | Promega Corporation   |
| <b>Plasmids</b>               |                                                                                                                                                                                                                                                                 |                       |
| <b>pSRKKm</b>                 | pBBR1MCS-2 derivative with a P <sub>lac</sub> promoter, <i>lacIq</i> , <i>lacZa</i> <sup>+</sup> , Km <sup>r</sup>                                                                                                                                              | 77                    |
| <b>pSRKGm</b>                 | pBBR1MCS-2 derivative with a P <sub>lac</sub> promoter, <i>lacIq</i> , <i>lacZa</i> <sup>+</sup> , Gm <sup>r</sup>                                                                                                                                              | 77                    |
| <b>pK18Hfq3xFlag</b>          | Suicide plasmid for Hfq tagging                                                                                                                                                                                                                                 | 29                    |
| <b>pK18Δhfq</b>               | Suicide plasmid for <i>hfq</i> deletion                                                                                                                                                                                                                         | 29                    |
| <b>pSRK</b>                   | Engineered pSRKKm lacking the LacIQ operator; Km <sup>r</sup>                                                                                                                                                                                                   | 42                    |
| <b>pSRK-R1</b>                | pSRK derivative constitutively expressing AbcR1                                                                                                                                                                                                                 | 42                    |
| <b>pSRK-R2</b>                | pSRK derivative constitutively expressing AbcR2                                                                                                                                                                                                                 | 42                    |
| <b>pR-EGFP</b>                | Reporter fusion plasmid for cloning of sRNA targets                                                                                                                                                                                                             | 42                    |
| <b>pR<i>SMa0495::egfp</i></b> | pR-EGFP expressing the <i>SMa0495::egfp</i> translational fusion                                                                                                                                                                                                | This work             |
| <b>pR<i>prbA::egfp</i></b>    | pR-EGFP expressing the <i>prbA::egfp</i> translational fusion                                                                                                                                                                                                   | This work             |

**Table S5.** Oligonucleotide sequences

| Name                                       | Nucleotide sequence                                                                                                    |
|--------------------------------------------|------------------------------------------------------------------------------------------------------------------------|
| sinI-Ndel-fwd                              | 5'-CGCCATATGATCAGGATAGTGAACGGAAAC-3'                                                                                   |
| sinI-FX-rev*                               | 5'-CGCTCTAGATC <u>ACTTGT</u> CATCGTCATCCTTGTAAATCGATATCGTGA<br>TCCTTGTAAATCACCATCGTGATCCTTGTAAATCGGCGGCGCGTGCCGTTTC-3' |
| TrueSeq_Sense_primer                       | 5'-AATGATACGGCGACCACCGAGATCTACACTCTTCCCTACACGACGCTCTTCCG<br>ATCT-3'                                                    |
| TrueSeq Antisense NNNNNN<br>primer Barcode | 5'-CAAGCAGAAGACGGCATAACGAGATNNNNNNGTACTGGAGTTCAGACGTGTGC<br>TCTCCGATCTTTTTTTTTTTTTTTTTTTTTTTTTTTT-3'                   |
| Smr7C probe                                | 5'-GATGAGGCCTTTGTCCTCATCTGGT-3'                                                                                        |
| Smr9C probe                                | 5'-CGCGTGATCTTTAATCCGTTTCCGG-3'                                                                                        |
| SmelC457 probe                             | 5'-GAGCAGTTGAACTTCGTTCCCTCCG-3'                                                                                        |
| SmelB126 probe                             | 5'-CCGCTAGTCGAAATTCTGAGGGAGA-3'                                                                                        |
| SmelB075 probe                             | 5'-CGCGATCATTCCAACCGCAACGCAA-3'                                                                                        |
| SMc_Hfq_ncRNA_6 probe                      | 5'-CCGAAAGTAGCGGAAAAGGGGAACA-3'                                                                                        |
| SMc_Hfq_asRNA_18 probe                     | 5'-TGCCTATTACAAGGACCTCGCCGAC-3'                                                                                        |
| SMc01642_F                                 | 5'-GGATCCGAACAGCGCGGATAACGCGCAA-3'                                                                                     |
| SMc01642_R                                 | 5'-GCTAGCTTTGCCGAGCATGACCTGAC-3'                                                                                       |
| SMA0495_F                                  | 5'-GCTAGCCATTGCAACCGCCGACCCCA-3'                                                                                       |
| SMA0495_R                                  | 5'-GGATCCTAGAAGGCATCGAATTTCCA-3'                                                                                       |

\*The 3XFLAG sequence is underlined.

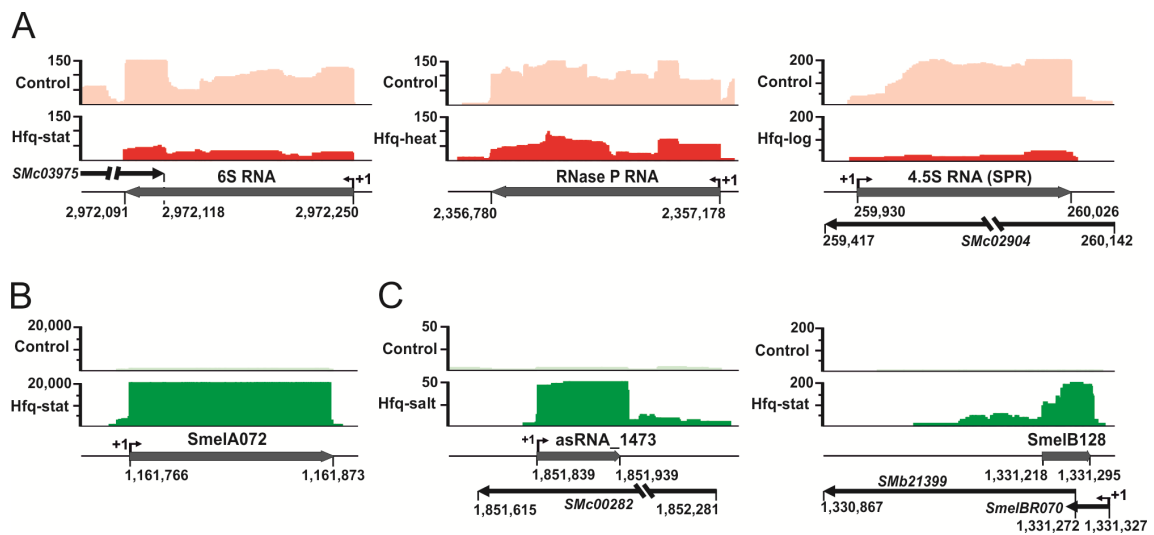

**Figure S1.** Additional examples of Hfq dependent and independent sRNAs. IGB plots and genomic information are as described in the legend to **Fig. 2**. **(A)** Housekeeping Hfq-independent sRNAs. **(B)** The Hfq-bound *trans*-sRNA SmelA072. **(C)** The Hfq-bound asRNAs SMc\_Hfq\_asRNA\_1473 and SmelB128.

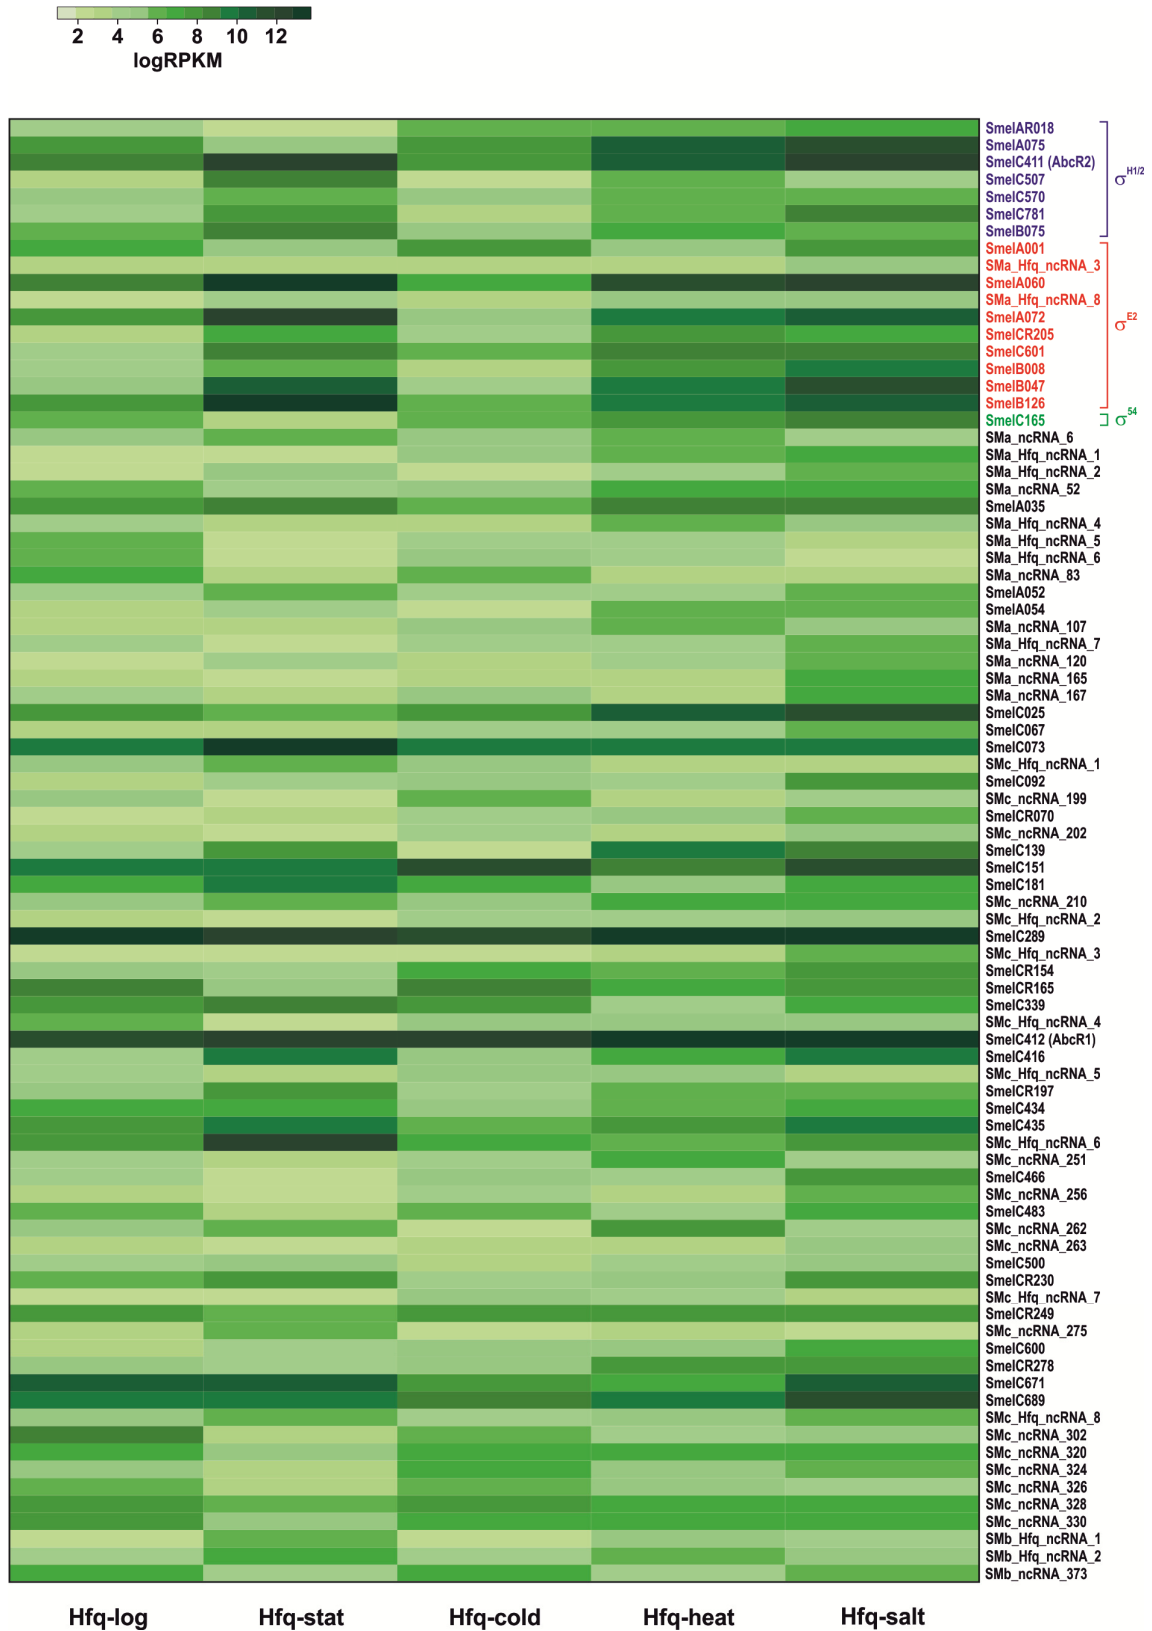

**Figure S2.** Recovery of the Hfq-bound *trans*-sRNAs in the five CoIP-RNA libraries. An RPKM value for each *trans*-sRNA was calculated from the raw read counts and plotted in a heat map according to the colour scale shown on top. sRNAs with predicted  $\sigma^{H1/2}$ ,  $\sigma^{E2}$  and  $\sigma^{54}$  promoters are indicated.



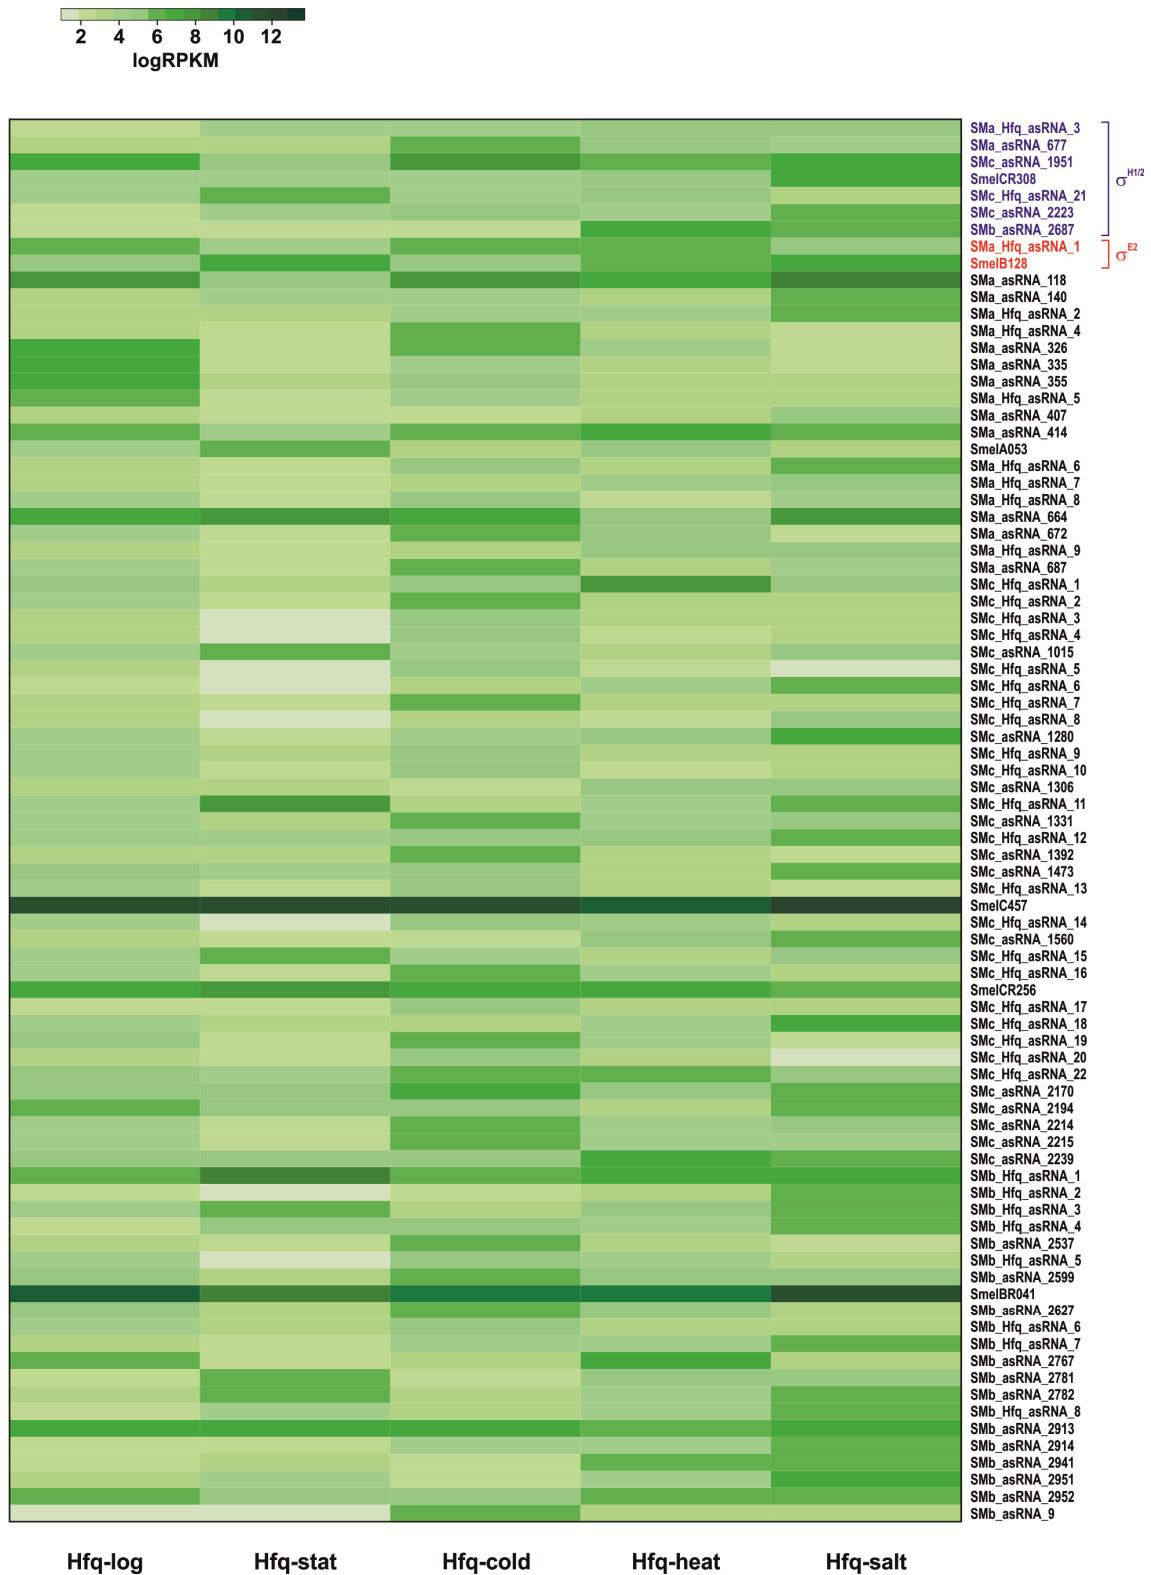

**Figure S3.** Recovery of the Hfq-bound asRNAs in the five CoIP-RNA libraries. An RPKM value for each asRNA was calculated from the raw read counts and plotted in a heat map according to the colour scale shown on top. sRNAs with predicted  $\sigma^{H1/2}$ ,  $\sigma^{E2}$  and  $\sigma^{54}$  promoters are indicated.

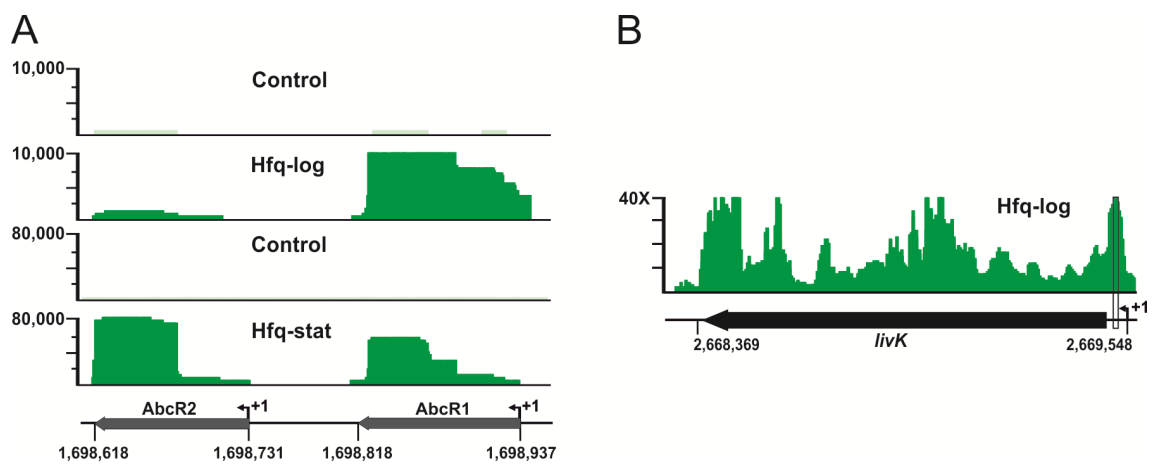

**Figure S4.** Enrichment of the AbcR1 and AbcR2 sRNAs (**A**) and the *livK* mRNA (**B**) in the indicated CoIP-RNA libraries. IGB plots and genomic information are as described in the legends to **Figs. 2** and **5**, respectively. The inset indicates the predicted interaction region of *livK* with AbcR1.
